# Supplementary material for: Non-target and suspect characterisation of organic contaminants in ambient air – Part 1: Combining a novel sample clean-up method with comprehensive two-dimensional gas chromatography
Source: Copernicus journal article supplement (doi:10.5194/acp-21-1697-2021), 2021-02-09
Supplement: Supplementary file 1 [file acp-21-1697-2021-supplement.zip]

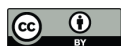

## *Supplement of*

# **Non-target and suspect characterisation of organic contaminants in ambient air – Part 1: Combining a novel sample clean-up method with comprehensive two-dimensional gas chromatography**

**Laura Röhler et al.**

*Correspondence to:* Laura Röhler ([laura.roehler@nmbu.no](mailto:laura.roehler@nmbu.no))

- [acp-21-1697-2021-supplement-title-page.pdf](#)
- [Excel-20200505.xlsx](#)
- [Supplement.pdf](#)

The copyright of individual parts of the supplement might differ from the CC BY 4.0 License.
