# Supplementary material for: Non-target and suspect characterisation of organic contaminants in ambient air – Part 1: Combining a novel sample clean-up method with comprehensive two-dimensional gas chromatography
Source: Copernicus journal article supplement (doi:10.5194/acp-21-1697-2021), 2021-02-09
Supplement: Supplementary file 1 [file Excel-20200505.xlsx]

## Sheet: Birkenes Air
Compound	Level	1st Dimension R.T. (s)	2nd Dimension R.T. (s)	Sample ID	CAS	INCHIKEYs	SMILES created with Jchem	Quant S/N	Quant Mass	Similarity	Reverse	Probability	Formula	Area	Weight	other comments	Found in Arctic air samples (Zeppelin observatory)	logP Jchem	logD pH7 Jchem	Atm. Ox half-life [days] (EPIsuite)	t1/2 fresh water [hrs] (EPIsuite)	t1/2 soil [hrs] (EPIsuite)	t1/2 sediment [hrs] (EPIsuite)	BCF (EPIsuite)	log Kow (EPIsuite)	log KoA (EPIsuite)	log KAw (calc from logKow and logKoA)	Toxcisity	HPV List
Legacy POPs and PAHs
HCB	0	1969.5	1.94	both PUF	118-74-1	CKAPSXZOOQJIBF-UHFFFAOYSA-N	ClC1=C(Cl)C(Cl)=C(Cl)C(Cl)=C1Cl	83139	284	742	745	9691	C6Cl6	8032459	282		GFF+PUF	5.59751	5.59751	633.112	4320	8640	38900	2803	5.73	7.355	-1.625
PCB 153	0	2860.5	1.89	both PUF	35065-27-1	MVWHGTYKUMDIHL-UHFFFAOYSA-N	ClC1=CC(Cl)=C(C=C1Cl)C1=CC(Cl)=C(Cl)C=C1Cl	315.39	360	851	851	9562	C12H4Cl6	15154	370		GFF+PUF	7.24474	7.24474	65.216	4320	8640	38900	22000	7.75	10.777	-3.027
p,p'-DDT	0	2977.5	1.82	both PUF and both GFF	104215-84-1	YVGGHNCTFXOJCH-WCGVKTIYSA-N	ClC1=CC=C(C=C1)C(C1=CC=C(Cl)C=C1)C(Cl)(Cl)Cl	184.57	235	883	890	8932	C14H9Cl5	18833	364		GFF+PUF	6.4575	6.4575	3.114	4320	8640	38900	16840	6.91	10.378	-3.468
a-HCH	1	2030.6	1.8	PUF S1	319-84-6	JLYXXMFPNIAWKQ-SHFUYGGZSA-N	ClC1C(Cl)C(Cl)C(Cl)C(Cl)C1Cl	1197.1	183	712	746	8641	C6H6Cl6	163563	288		PUF	4.34554	4.34554	18.659	4320	8640	38900	250.4	4.14	7.817	-3.677	possibly carcinogenic to humans	SPIN
g-HCH	1	2171.2	1.77	PUF S1	58-89-9	JLYXXMFPNIAWKQ-GNIYUCBRSA-N	ClC1C(Cl)C(Cl)C(Cl)C(Cl)C1Cl	3043	183	680	725	5680	C6H6Cl6	390167	288		PUF	4.34554	4.34554	18.659	4320	8640	38900	250.4	4.14	7.817	-3.677	STOT Rep. Exp. 2, acute&chronic aq. 1	OECD HPV, SPIN, EU (07)
a-HCH	1	2030.6	1.87	PUF S2	319-84-6	JLYXXMFPNIAWKQ-SHFUYGGZSA-N	ClC1C(Cl)C(Cl)C(Cl)C(Cl)C1Cl	812.19	183	718	750	3999	C6H6Cl6	93982	288		PUF	4.34554	4.34554	18.659	4320	8640	38900	250.4	4.14	7.817	-3.677	possibly carcinogenic to humans	SPIN
trans-Nonachlor	1	2585.4	2.17	PUF S2	39765-80-5	OCHOKXCPKDPNQU-DFACZZRHSA-N	ClC1C(Cl)C2C(C1Cl)C1(Cl)C(Cl)=C(Cl)C2(Cl)C1(Cl)Cl	490.57	409	715	747	4033	C10H5Cl9	27026	440		PUF	5.59124	5.59124	2.197	4320	8640	38900	7190	6.35	9.344	-2.994		.
Heptachlor exo epoxide	1	2536	2.03	PUF S2	1024-57-3	ZXFXBSWRVIQKOD-HWKPLSEASA-N	ClC1C2OC2C2C1C1(Cl)C(Cl)=C(Cl)C2(Cl)C1(Cl)Cl	454.62	353	638	646	9520	C10H5Cl7O	17280	386		PUF	4.04376	4.04376	2.067	4320	8640	38900	897	4.98	8.046	-3.066	STOT Rep. Exp. 2, Carc. 2, acute&chronic aq. 1	.
Biphenyl	1	1430.2	1.76	PUF S1	92-52-4	ZUOUZKKEUPVFJK-UHFFFAOYSA-N	C1=CC=C(C=C1)C1=CC=CC=C1	1529.1	154	841	924	8338	C12H10	343295	154			3.62047	3.62047	1.579	360	720	3240	205.5	4.01	5.91	-1.9	vT aq life	ICCA HPV (03), OECD HPV, EU (07), US (10)
Biphenyl	1	1430.2	1.76	PUF S2	92-52-4	ZUOUZKKEUPVFJK-UHFFFAOYSA-N	C1=CC=C(C=C1)C1=CC=CC=C1	1888.9	154	843	927	8394	C12H10	420172	154			3.62047	3.62047	1.579	360	720	3240	205.5	4.01	5.91	-1.9	vT aq life	ICCA HPV (03), OECD HPV, EU (07), US (10)
p,p'-DDE	1	2726	1.86	PUF S1	72-55-9	UCNVFOCBFJOQAL-UHFFFAOYSA-N	ClC(Cl)=C(C1=CC=C(Cl)C=C1)C1=CC=C(Cl)C=C1	1957.6	246	794	898	5808	C14H8Cl4	160430	316		PUF	6.10556	6.10556	1.44	4320	8640	38900	9168	6.51	9.279	-2.769		.
p,p'-DDE	1	2726	1.94	PUF S2	72-55-9	UCNVFOCBFJOQAL-UHFFFAOYSA-N	ClC(Cl)=C(C1=CC=C(Cl)C=C1)C1=CC=C(Cl)C=C1	1188.3	246	709	786	7599	C14H8Cl4	80658	316		PUF	6.10556	6.10556	1.44	4320	8640	38900	9168	6.51	9.279	-2.769		.
Fluorene	1	1855.8	1.86	PUF S2	86-73-7	NIHNNTQXNPWCJQ-UHFFFAOYSA-N	C1C2=CC=CC=C2C2=CC=CC=C12	133.77	168	773	832	9882	C13H10	32602	166			3.73902	3.73902	1.208	360	720	3240	266.1	4.18	6.585	-2.405		SPIN
Dieldrin	1	2737.4	1.95	PUF S1	60-57-1	DFBKLUNHFCTMDC-PICURKEMSA-N	ClC1=C(Cl)C2(Cl)C3C4CC(C5OC45)C3C1(Cl)C2(Cl)Cl	421.13	263	752	817	8033	C12H8Cl6O	26531	378		GFF+PUF	3.94718	3.94718	1.163	4320	8640	38900	1253	5.2	8.588	-3.388	STOT Rep. Exp. 1, Repr. 1B, acute tox 1 inhalation&oral, acute&chronic aq. 1	SPIN
Dieldrin	1	2737.4	2.03	PUF S2	60-57-1	DFBKLUNHFCTMDC-PICURKEMSA-N	ClC1=C(Cl)C2(Cl)C3C4CC(C5OC45)C3C1(Cl)C2(Cl)Cl	421.32	263	828	830	9607	C12H8Cl6O	33880	378		GFF+PUF	3.94718	3.94718	1.163	4320	8640	38900	1253	5.2	8.588	-3.388	STOT Rep. Exp. 1, Repr. 1B, acute tox 1 inhalation&oral, acute&chronic aq. 1	SPIN
Benzo[ghi]fluoranthene	1	3178.2	1.82	PUF S1	203-12-3	YEIHPPOCKIHUQJ-UHFFFAOYSA-N	C1=CC2=C3C(=C1)C1=CC=CC4=C1C3=C(C=C2)C=C4	44490	226	933	935	9882	C18H10	6045992	226		GFF+PUF	4.61566	4.61566	0.172	1440	2880	13000	2041	5.52	9.781	-4.261		.
Benzo[ghi]fluoranthene	1	3178.2	1.81	GFF S1	203-12-3	YEIHPPOCKIHUQJ-UHFFFAOYSA-N	C1=CC2=C3C(=C1)C1=CC=CC4=C1C3=C(C=C2)C=C4	23528	226	904	915	9893	C18H10	2591546	226		GFF+PUF	4.61566	4.61566	0.172	1440	2880	13000	2041	5.52	9.781	-4.261		.
Benzo[ghi]fluoranthene	1	3178.2	1.88	PUF S2	203-12-3	YEIHPPOCKIHUQJ-UHFFFAOYSA-N	C1=CC2=C3C(=C1)C1=CC=CC4=C1C3=C(C=C2)C=C4	48133	226	945	946	9894	C18H10	7078193	226		GFF+PUF	4.61566	4.61566	0.172	1440	2880	13000	2041	5.52	9.781	-4.261		.
Benzo[ghi]fluoranthene	1	3178.2	1.82	GFF S2	203-12-3	YEIHPPOCKIHUQJ-UHFFFAOYSA-N	C1=CC2=C3C(=C1)C1=CC=CC4=C1C3=C(C=C2)C=C4	59397	226	942	950	9893	C18H10	7691155	226		GFF+PUF	4.61566	4.61566	0.172	1440	2880	13000	2041	5.52	9.781	-4.261		.
3xPCB	2	2289	1.84	PUF S1				2404.5	258	731	776	2317	C12H7Cl3	237502	256	TriCl PCB		5.43261	5.43261					180	5.69	7.853	-2.163
3xPCB	2	2289	1.92	PUF S2				1990.3	258	766	815	1420	C12H7Cl3	173677	256	TriCl PCB		5.43261	5.43261					12200	5.81	7.968	-2.158
4x PCB	2	2395.4	1.84	PUF S1				933.63	294	687	804	1362	C12H6Cl4	45116	290	TetraCl PCB		6.03665	6.03665					7090	6.34	8.632	-2.292
4xPCB	2	2395.4	1.91	PUF S2				1357.6	292	740	836	1779	C12H6Cl4	86789	290	TetraCl PCB		6.03665	6.03665					7090	6.34	8.582	-2.242
4xPCB	2	2406.8	1.87	PUF S1				5832.7	290	807	851	1259	C12H6Cl4	419022	290	TetraCl PCB		6.03665	6.03665					7090	6.34	8.632	-2.292
4xPCB	2	2406.8	1.94	PUF S2				2660.9	290	819	892	1103	C12H6Cl4	188438	290	TetraCl PCB		6.03665	6.03665					9250	6.11	8.352	-2.242
4xPCB	2	2482.8	1.9	PUF S2				463.95	290	784	845	1345	C12H6Cl4	21500	290	TetraCl PCB		6.03665	6.03665					9250	6.11	8.352	-2.242
5xPCB	2	2600.6	1.93	PUF S2				643.22	326	739	784	809	C12H5Cl5	33161	324	PentaCl PCB		6.64069	6.64069					2120	6.98	9.403	-2.423
5xPCB	2	2631	1.9	PUF S1				150.69	94	676	724	1108	C12H5Cl5	78029	324	PentaCl PCB		6.64069	6.64069					5070	6.67	9.189	-2.519
5xPCB	2	2646.2	1.98	PUF S2				136.48	328	652	743	662	C12H5Cl5	5976.3	324	PentaCl PCB		6.64069	6.64069					2120	6.98	9.403	-2.423
5xPCB	2	2771.6	1.94	PUF S2				245.26	326	644	757	820	C12H5Cl5	11341	324	PentaCl PCB		6.64069	6.64069					4080	6.79	8.727	-1.937
Known CECs
HBB	0	3277	1.83	both PUF	87-82-1	CAYGQBVSOZLICD-UHFFFAOYSA-N	BrC1=C(Br)C(Br)=C(Br)C(Br)=C1Br	933.49	549	910	927	9861	C6Br6	37435	557		GFF+PUF	6.58576	6.58576	933.944	4320	8640	38900	4699	6.07	9.126	-3.056
Pentabromotoluene	2	2973	1.85	PUF S1				94.627	86	579	637	9759	C7H3Br5	26912	482	no std analysed	PUF	6.33043	6.33043	57.822	4320	8640	38900	1777	5.43	8.042	-2.612
Tris(1,3-dichloroisopropyl)phosphate	1	2931.2	1.79	PUF S1	13674-87-8	ASLWPAWFJZFCKF-UHFFFAOYSA-N	ClCC(CCl)OP(=O)(OC(CCl)CCl)OC(CCl)CCl	802.12	99	770	848	5413	C9H15Cl6O4P	191488	428	TDCPP/ TDCIPP		4.28002	4.28002	0.592	4320	8640	38900	17.8	3.65	10.622	-6.972	STOT RE 2, Carc. 2	OECD HPV, HPVIS, SPIN, EU (07), US (10)
Tris(1,3-dichloroisopropyl)phosphate	1	2931.2	1.79	GFF S1	13674-87-8	ASLWPAWFJZFCKF-UHFFFAOYSA-N	ClCC(CCl)OP(=O)(OC(CCl)CCl)OC(CCl)CCl	1713.1	99	855	869	5448	C9H15Cl6O4P	832112	428	TDCPP/ TDCIPP		4.28002	4.28002	0.592	4320	8640	38900	17.8	3.65	10.622	-6.972	STOT RE 2, Carc. 2	OECD HPV, HPVIS, SPIN, EU (07), US (10)
Triisobutyl phosphate	1	1502.4	1.91	GFF S1	126-71-6	HRKAMJBPFPHCSD-UHFFFAOYSA-N	CC(C)COP(=O)(OCC(C)C)OCC(C)C	919.16	99	788	854	9463	C12H27O4P	598570	266			3.84669	3.84669	0.136	360	720	3240	16.44	3.6	7.485	-3.885		OECD HPV, SPIN, EU (07)
Isomer of Cresyl diphenylphosphate	2	3235.2	1.69	GFF S1				469.1	340	714	786	8618	C19H17O4P	23297	340	RT doesn´t match standard		5.60108	5.60108	0.907	900	1800	8100	65.74	4.51	9.62	-5.11		OECD HPV, SPIN, EU (07)
Positional isomer of Tris(4-isoopropylphenyl) phosphate	2	3455.6	2.14	PUF S2				105.53	160	622	695	9087	C27H33O4P	23413	452	Isomer of TiPPP		8.82	8.82	0.538	1440	2880	13000	193	9.07	13.992	-4.922		.
Positional isomer of Tris(4-isoopropylphenyl) phosphate	2	3516.4	2.37	PUF S2				104.1	160	557	700	8353	C27H33O4P	13102	452	Isomer of TiPPP		8.82	8.82	0.538	1440	2880	13000	193	9.07	13.992	-4.922		.
Isomer of Di(isoopropyl phenyl) phenyl phosphate	2	3318.8	1.87	GFF S1				362.17	118	633	755	7707	C24H27O4P	108046	410			7.57767	7.57767	0.423	900	1800	8100	997.5	7.61	12.819	-5.209		.
Isomer of Di(isoopropyl phenyl) phenyl phosphate	2	3318.8	1.93	PUF S2				383.14	118	787	836	8751	C24H27O4P	108284	410			7.57767	7.57767	0.423	900	1800	8100	997.5	7.61	12.819	-5.209		.
Isomer of Di(isoopropyl phenyl) phenyl phosphate	2	3391	2.09	PUF S2				165.73	118	551	695	6943	C24H27O4P	64731	410			7.57767	7.57767	0.423	900	1800	8100	997.5	7.61	12.819	-5.209		.
Isomer of Di(isoopropyl phenyl) phenyl phosphate	2	3470.8	2.07	PUF S2				54.247	118	646	756	9080	C24H27O4P	11679	410			7.57767	7.57767	0.423	900	1800	8100	997.5	7.61	12.819	-5.209		.
Positional isomer of Tris(1-chloro-2-propyl)phosphate	2	2167.4	1.75	PUF S1				548.83	277	692	829	9586	C9H18Cl3O4P	36195	326			3.35697	3.35697	0.239	1440	2880	13000	4.077	2.68	9.446	-6.766	STOT Rep. Exp. 2, Repr. 2	OECD HPV, SPIN, EU (07), US (1990)
Isomer of Isopropylphenyl diphenyl phosphate	2	3242.8	1.82	PUF S2				283.89	118	725	755	9708	C21H21O4P	86115	368	RT doesn´t match standard		6.33266	6.33266	0.592	900	1800	8100	221.6	5.31	10.81	-5.5
Isomer of Triisobutyl phosphate	2	1703.8	1.93	PUF S2				151.54	99	514	713	9163	C12H27O4P	41472	266	RT doesn´t match standard		3.84669	3.84669	0.136	360	720	3240	16.44	3.6	7.485	-3.885
Potential CECs with LRATP
1,4-Benzenedicarbonitrile	1	1373.2	1.46	PUF S1	623-26-7	BHXFKXOIODIUJO-UHFFFAOYSA-N	N#CC1=CC=C(C=C1)C#N	350.11	128	850	888	3114	C8H4N2	111043	128		PUF	1.68544	1.68544	237.334	360	720	3240	3.162	0.99	5.677	-4.687	T air pollutant
1,4-Benzenedicarbonitrile	1	1373.2	1.46	PUF S2	623-26-7	BHXFKXOIODIUJO-UHFFFAOYSA-N	N#CC1=CC=C(C=C1)C#N	467.15	128	901	912	3853	C8H4N2	159522	128		PUF	1.68544	1.68544	237.334	360	720	3240	3.162	0.99	5.677	-4.687	T air pollutant
Benzenesulfonamide	1	2004	1.5	PUF S1	98-10-2	KHBQMWCZKVMBLN-UHFFFAOYSA-N	NS(=O)(=O)C1=CC=CC=C1	524.13	157	663	845	9293	C6H7NO2S	79525	157		GFF	0.579277	0.579054	25.658	360	720	3240	3.162	0.31	5.073	-4.763	STOT Rep. Exp. 1 and 2	SPIN
Benzenesulfonamide	1	2004	1.56	PUF S2	98-10-2	KHBQMWCZKVMBLN-UHFFFAOYSA-N	NS(=O)(=O)C1=CC=CC=C1	814.52	157	722	879	9616	C6H7NO2S	131886	157		GFF	0.579277	0.579054	25.658	360	720	3240	3.162	0.31	5.073	-4.763	STOT Rep. Exp. 1 and 2	SPIN
Benzenesulfonamide	1	2004	1.5	GFF S2	98-10-2	KHBQMWCZKVMBLN-UHFFFAOYSA-N	NS(=O)(=O)C1=CC=CC=C1	465.06	157	810	905	8822	C6H7NO2S	89538	157		GFF	0.579277	0.579054	25.658	360	720	3240	3.162	0.31	5.073	-4.763	STOT Rep. Exp. 1 and 2	SPIN
Benzene, 1-methyl-2-nitro-	1	1008.4	1.68	PUF S1	88-72-2	PLAZTCDQAHEYBI-UHFFFAOYSA-N	CC1=CC=CC=C1[N+]([O-])=O	326.23	120	758	835	9230	C7H7NO2	146512	137			2.42665	2.42665	13.852	900	1800	8100	15.29	2.3	5.592	-3.292	Muta&Carc. 1B, Repr2	OECD HPV, EU (07), US (1990)
Benzene, 1-methyl-2-nitro-	1	1008.4	1.64	PUF S2	88-72-2	PLAZTCDQAHEYBI-UHFFFAOYSA-N	CC1=CC=CC=C1[N+]([O-])=O	346.26	120	816	861	9505	C7H7NO2	143687	137			2.42665	2.42665	13.852	900	1800	8100	15.29	2.3	5.592	-3.292	Muta&Carc. 1B, Repr2	OECD HPV, EU (07), US (1990)
p-Toluenesulfonamide	1	2178.8	1.54	PUF S1	70-55-3	LMYRWZFENFIFIT-UHFFFAOYSA-N	CC1=CC=C(C=C1)S(N)(=O)=O	266.09	171	762	854	4512	C7H9NO2S	20568	171			1.0927	1.09256	8.737	900	1800	8100	3.162	0.82	5.54	-4.72	moderat toxic	EU (04), US (10)
p-Toluenesulfonamide	1	2178.8	1.54	GFF S1	70-55-3	LMYRWZFENFIFIT-UHFFFAOYSA-N	CC1=CC=C(C=C1)S(N)(=O)=O	63.241	171	576	800	3133	C7H9NO2S	5707	171			1.0927	1.09256	8.737	900	1800	8100	3.162	0.82	5.54	-4.72	moderat toxic	EU (04), US (10)
p-Toluenesulfonamide	1	2178.8	1.54	GFF S2	70-55-3	LMYRWZFENFIFIT-UHFFFAOYSA-N	CC1=CC=C(C=C1)S(N)(=O)=O	162.9	171	739	890	6581	C7H9NO2S	20615	171			1.0927	1.09256	8.737	900	1800	8100	3.162	0.82	5.54	-4.72	moderat toxic	EU (04), US (10)
9,10-Anthraquinone	1	2608.2	1.7	PUF S1	84-65-1	RZVHIXYEVGDQDX-UHFFFAOYSA-N	O=C1C2=CC=CC=C2C(=O)C2=CC=CC=C12	30567	152	938	942	9758	C14H8O2	10013492	208		GFF	2.91871	2.91871	7.138	900	1800	8100	20.83	3.39	9.407	-6.017	STOT Rep. Exp. 2, carc.2, acute&chronic aq. 1	OECD HPV, SPIN, EU (07), US (10)
9,10-Anthraquinone	1	2608.2	1.77	PUF S2	84-65-1	RZVHIXYEVGDQDX-UHFFFAOYSA-N	O=C1C2=CC=CC=C2C(=O)C2=CC=CC=C12	26027	152	941	946	9716	C14H8O2	11605500	208		GFF	2.91871	2.91871	7.138	900	1800	8100	20.83	3.39	9.407	-6.017	STOT Rep. Exp. 2, carc.2, acute&chronic aq. 1	OECD HPV, SPIN, EU (07), US (10)
Tetrachloroveratrole	1	2007.8	1.88	PUF S1	944-61-6	NCYHCGGUQGDEQW-UHFFFAOYSA-N	COC1=C(Cl)C(Cl)=C(Cl)C(Cl)=C1OC	27656	261	740	777	9625	C8H6Cl4O2	1869231	274		PUF	4.07408	4.07408	4.377	4320	8640	38900	747.5	4.86	8.494	-3.634	pos. P	.
Tetrachloroveratrole	1	2007.8	1.95	PUF S2	944-61-6	NCYHCGGUQGDEQW-UHFFFAOYSA-N	COC1=C(Cl)C(Cl)=C(Cl)C(Cl)=C1OC	20820	261	750	771	9621	C8H6Cl4O2	1415345	274		PUF	4.07408	4.07408	4.377	4320	8640	38900	747.5	4.86	8.494	-3.634	pos. P	.
2-Methyl-9,10-Anthraquinone	1	2771.6	1.73	PUF S1	84-54-8	NJWGQARXZDRHCD-UHFFFAOYSA-N	CC1=CC=C2C(=O)C3=CC=CC=C3C(=O)C2=C1	6348.3	222	920	926	9823	C15H10O2	994695	222		GFF	3.43213	3.43213	3.765	900	1800	8100	44.63	3.89	10.733	-6.843		.
2-Methyl-9,10-Anthraquinone	1	2771.6	1.74	GFF S1	84-54-8	NJWGQARXZDRHCD-UHFFFAOYSA-N	CC1=CC=C2C(=O)C3=CC=CC=C3C(=O)C2=C1	1062.7	222	717	802	9202	C15H10O2	169262	222		GFF	3.43213	3.43213	3.765	900	1800	8100	44.63	3.89	10.733	-6.843		.
2-Methyl-9,10-Anthraquinone	1	2771.6	1.81	PUF S2	84-54-8	NJWGQARXZDRHCD-UHFFFAOYSA-N	CC1=CC=C2C(=O)C3=CC=CC=C3C(=O)C2=C1	5887.1	222	910	925	9762	C15H10O2	997963	222		GFF	3.43213	3.43213	3.765	900	1800	8100	44.63	3.89	10.733	-6.843		.
2-Methyl-9,10-Anthraquinone	1	2771.6	1.74	GFF S2	84-54-8	NJWGQARXZDRHCD-UHFFFAOYSA-N	CC1=CC=C2C(=O)C3=CC=CC=C3C(=O)C2=C1	3076.7	222	900	900	9881	C15H10O2	464951	222		GFF	3.43213	3.43213	3.765	900	1800	8100	44.63	3.89	10.733	-6.843		.
Benzene, 1-methoxy-2-nitro-	1	1491	1.56	PUF S1	91-23-6	CFBYEGUGFPZCNF-UHFFFAOYSA-N	COC1=CC=CC=C1[N+]([O-])=O	908.03	106	952	952	9720	C7H7NO3	207344	153	2-Nitroanisole	PUF	1.75556	1.75556	3.041	900	1800	8100	6.434	1.73	6.486	-4.756	Carc. 1B	OECD HPV, EU (07)
Benzene, 1-methoxy-2-nitro-	1	1491	1.57	PUF S2	91-23-6	CFBYEGUGFPZCNF-UHFFFAOYSA-N	COC1=CC=CC=C1[N+]([O-])=O	214.41	106	769	803	9332	C7H7NO3	53692	153		PUF	1.75556	1.75556	3.041	900	1800	8100	6.434	1.73	6.486	-4.756	Carc. 1B	OECD HPV, EU (07)
2-Naphthalenecarbonitrile	1	1817.8	1.65	PUF S1	613-46-7	AZKDTTQQTKDXLH-UHFFFAOYSA-N	N#CC1=CC2=CC=CC=C2C=C1	7953.4	153	910	910	5937	C11H7N	1725774	153		PUF	2.81882	2.81882	2.804	360	720	3240	28.78	2.72	6.403	-3.683		.
2-Naphthalenecarbonitrile	1	1817.8	1.7	PUF S2	613-46-7	AZKDTTQQTKDXLH-UHFFFAOYSA-N	N#CC1=CC2=CC=CC=C2C=C1	7920.3	153	934	947	6370	C11H7N	1781409	153		PUF	2.81882	2.81882	2.804	360	720	3240	28.78	2.72	6.403	-3.683		.
4H-Cyclopenta[def]phenanthren-4-one	1	2710.8	1.74	PUF S1	5737-13-3	IFCBMPOMNSORDG-UHFFFAOYSA-N	O=C1C2=CC=CC3=C2C2=C(C=CC=C12)C=C3	41119	204	788	804	9748	C15H8O	4411825	204		GFF+PUF	3.43831	3.43831	2.141	900	1800	8100	64.96	4.14	9.604	-5.464		.
4H-Cyclopenta[def]phenanthren-4-one	1	2710.8	1.74	GFF S1	5737-13-3	IFCBMPOMNSORDG-UHFFFAOYSA-N	O=C1C2=CC=CC3=C2C2=C(C=CC=C12)C=C3	3649	204	803	885	9873	C15H8O	401301	204		GFF+PUF	3.43831	3.43831	2.141	900	1800	8100	64.96	4.14	9.604	-5.464		.
4H-Cyclopenta[def]phenanthren-4-one	1	2710.8	1.81	PUF S2	5737-13-3	IFCBMPOMNSORDG-UHFFFAOYSA-N	O=C1C2=CC=CC3=C2C2=C(C=CC=C12)C=C3	40241	204	789	832	9786	C15H8O	4550573	204		GFF+PUF	3.43831	3.43831	2.141	900	1800	8100	64.96	4.14	9.604	-5.464		.
4H-Cyclopenta[def]phenanthren-4-one	1	2710.8	1.74	GFF S2	5737-13-3	IFCBMPOMNSORDG-UHFFFAOYSA-N	O=C1C2=CC=CC3=C2C2=C(C=CC=C12)C=C3	9051.8	204	855	915	9850	C15H8O	1030888	204		GFF+PUF	3.43831	3.43831	2.141	900	1800	8100	64.96	4.14	9.604	-5.464		.
Positional isomer of 1,2-benzenedicarbonitrile	2	1388.4	1.44	PUF S1				238.39	128	826	881	2874	C8H4N2	77398	128	RT doesn´t match standard		1.68544	1.68544	237.334	360	720	3240	3.162	0.99	5.677	-4.687	T air pollutant
Nitrapyrin	2	1609.5	1.66	PUF S2									C6H3Cl4N			No peakmarker possible		3.46355	3.46355	212.756	4320	8640	38900	82.59	3.41	6.491	-3.081	aq chronic 2	SPIN
Positional isomer of 1,2-benzenedicarbonitrile	2	1487.2	1.51	PUF S1				729.64	128	844	909	6012	C8H4N2	201802	128	RT doesn´t match standard		1.68544	1.68544	175.947	360	720	3240	3.162	0.8	5.487	-4.687	T air pollutant
Positional isomer of 1,2-benzenedicarbonitrile	2	1487.2	1.51	PUF S2				522.03	128	848	909	6076	C8H4N2	168931	128	RT doesn´t match standard		1.68544	1.68544	175.947	360	720	3240	3.162	0.8	5.487	-4.687	T air pollutant
2,6-Dichlorobenzoic acid	2	2118	1.79	PUF S2				2032.2	190	676	708	1966	C7H4Cl2O2	245279	190	Differences in logP/ logD		2.83892	-0.583172	16.005	900	1800	8100	3.162	2.82	8.434	-5.614
2,6-Dichlorobenzoic acid	2	2118	1.73	PUF S1				680.07	190	800	841	2075	C7H4Cl2O2	134352	190	Differences in logP/ logD		2.83892	-0.674007	12.192	900	1800	8100	3.162	2.23	7.844	-5.614
Dibenzothiophene sulfone	2	2942.6	1.6	PUF S1				1992	216	930	930	9852	C12H8O2S	170377	216		GFF	2.60206	2.60206	7.385	900	1800	8100	24.38	2.61	8.059	-5.449
Dibenzothiophene sulfone	2	2942.6	1.66	PUF S2				1199.7	216	926	926	9855	C12H8O2S	109371	216		GFF	2.60206	2.60206	7.385	900	1800	8100	24.38	2.61	8.059	-5.449
Isomer of 9,10-anthraquinone	2	2448.6	1.85	PUF S2				1021	208	636	739	4359	C14H8O2	153244	208	RT doesn´t match standard	this isomer not in AA	2.91871	2.91871	7.138	900	1800	8100	20.83	3.39	9.407	-6.017	STOT Rep. Exp. 2, carc.2, acute&chronic aq. 1	EU, SPIN
3-Methylacetophenone	2	1692.4	1.24	GFF S1				131.4	119	757	882	3924	C9H10O	2151883	134			2.04431	2.04431	4.425	360	720	3240	3.166	2.15	5.505	-3.355
1,5-Dichloro-2-methoxy-3-methylbenzene	2	1399.8	1.81	PUF S1				1229.1	190	822	826	6322	C8H8Cl2O	180302	190		PUF	3.53709	3.53709	3.401	1440	2880	13000	176.6	3.91	6.013	-2.103
1,5-Dichloro-2-methoxy-3-methylbenzene	2	1403.6	1.81	PUF S2				927.08	190	777	797	6047	C8H8Cl2O	132103	190		PUF	3.53709	3.53709	3.401	1440	2880	13000	176.6	3.91	6.013	-2.103
Diphenylethanedione	2	2311.8	1.66	PUF S1				5976	105	920	937	1435	C14H10O2	3613838	210			3.24473	3.24473	3.009	360	720	3240	78.91	3.38	9.88	-6.5
Diphenylethanedione	2	2311.8	1.73	PUF S2				4203.7	105	919	942	1609	C14H10O2	2148968	210			3.24473	3.24473	3.009	360	720	3240	78.91	3.38	9.88	-6.5
1-Naphthalenecarbonitrile	2	1760.8	1.66	PUF S1				4129.5	153	941	941	6411	C11H7N	995574	153	no std analysed		2.81882	2.81882	2.804	360	720	3240	28.78	2.72	6.403	-3.683		.
1-Naphthalenecarbonitrile	2	1760.8	1.7	PUF S2				2633.6	153	939	939	5764	C11H7N	750942	153	no std analysed		2.81882	2.81882	2.804	360	720	3240	28.78	2.72	6.403	-3.683		.
Isomer of 1,2,3-trichloro-4,5-dimethoxybenzene	2	1612.6	1.87	PUF S1				107.02	225	651	654	5059	C8H7Cl3O2	6278.3	240	RT doesn´t match standard	PUF	3.47004	3.47004	2.461	1440	2880	13000	205.5	4.01	7.514	-3.504
Isomer of 1,2,3-trichloro-4,5-dimethoxybenzene	2	1905.2	1.77	PUF S1				25619	225	717	717	7885	C8H7Cl3O2	2135860	240	RT doesn´t match standard	PUF	3.47004	3.47004	2.461	1440	2880	13000	205.5	4.01	7.514	-3.504
Isomer of 1,2,3-trichloro-4,5-dimethoxybenzene	2	1612.6	1.9	PUF S2				109.47	225	699	711	7903	C8H7Cl3O2	6189.9	240	RT doesn´t match standard	PUF	3.47004	3.47004	2.461	1440	2880	13000	205.5	4.01	7.514	-3.504
Isomer of 1,2,3-trichloro-4,5-dimethoxybenzene	2	1905.2	1.83	PUF S2				9092.4	225	786	786	9254	C8H7Cl3O2	765819	240	RT doesn´t match standard	PUF	3.47004	3.47004	2.461	1440	2880	13000	205.5	4.01	7.514	-3.504
Isomer of methyl-acetophenone	2	1700	1.74	GFF S1				440.01	119	763	829	2284	C9H10O	178120	134	RT doesn´t match standard		2.04431	2.04431	2.193	360	720	3240	3.526	2.22	5.575	-3.355
Isomer of methyl-acetophenone	2	1726.6	1.74	GFF S1				730.13	119	822	863	2535	C9H10O	368041	134	RT doesn´t match standard		2.04431	2.04431	2.193	360	720	3240	3.526	2.22	5.575	-3.355
5-Methylisobenzofuran-1(3H)-one	2	1760.8	1.61	GFF S2				237.51	119	825	868	3380	C9H8O2	79885	148			2.04137	2.04137	2.064	360	720	3240	3.158	1.26	4.502	-3.242
Potential CECs without LRATP
9-Fluorenone	1	2194	1.73	PUF S1	486-25-9	YLQWCDOCJODRMT-UHFFFAOYSA-N	O=C1C2=CC=CC=C2C2=CC=CC=C12	151434	180	949	950	9659	C13H8O	40314733	180		PUF	3.10658	3.10658	1.732	360	720	3240	27.8	3.58	8.138	-4.558		.
9-Fluorenone	1	2194	1.8	PUF S2	486-25-9	YLQWCDOCJODRMT-UHFFFAOYSA-N	O=C1C2=CC=CC=C2C2=CC=CC=C12	145090	180	958	958	9689	C13H8O	43166407	180		PUF	3.10658	3.10658	1.732	360	720	3240	27.8	3.58	8.138	-4.558		.
1,2-Benzanthraquinone	1	3444.2	1.97	PUF S1	2498-66-0	LHMRXAIRPKSGDE-UHFFFAOYSA-N	O=C1C2=CC=CC=C2C(=O)C2=C3C=CC=CC3=CC=C12	1064.2	258	885	907	9683	C18H10O2	120690	258		GFF	3.90818	3.90818	1.182	900	1800	8100	96.61	4.4	12.297	-7.897		.
1,2-Benzanthraquinone	1	3444.2	1.93	GFF S1	2498-66-0	LHMRXAIRPKSGDE-UHFFFAOYSA-N	O=C1C2=CC=CC=C2C(=O)C2=C3C=CC=CC3=CC=C12	5438	258	875	881	9725	C18H10O2	523655	258		GFF	3.90818	3.90818	1.182	900	1800	8100	96.61	4.4	12.297	-7.897		.
1,2-Benzanthraquinone	1	3444.2	1.95	PUF S2	2498-66-0	LHMRXAIRPKSGDE-UHFFFAOYSA-N	O=C1C2=CC=CC=C2C(=O)C2=C3C=CC=CC3=CC=C12	545.84	258	831	879	9824	C18H10O2	58484	258		GFF	3.90818	3.90818	1.182	900	1800	8100	96.61	4.4	12.297	-7.897		.
1,2-Benzanthraquinone	1	3444.2	1.93	GFF S2	2498-66-0	LHMRXAIRPKSGDE-UHFFFAOYSA-N	O=C1C2=CC=CC=C2C(=O)C2=C3C=CC=CC3=CC=C12	13346	258	907	917	9642	C18H10O2	1595370	258		GFF	3.90818	3.90818	1.182	900	1800	8100	96.61	4.4	12.297	-7.897		.
o-Terphenyl	1	2357.4	1.77	PUF S1	84-15-1	OIAQMFOKAXHPNH-UHFFFAOYSA-N	C1=CC=C(C=C1)C1=CC=CC=C1C1=CC=CC=C1	49961	230	801	851	8761	C18H14	4324505	230		PUF	5.2677	5.2677	1.163	900	1800	8100	2041	5.52	8.122	-2.602	acute&chronic aq. 1	SPIN, US (10)
o-Terphenyl	1	2357.4	1.84	PUF S2	84-15-1	OIAQMFOKAXHPNH-UHFFFAOYSA-N	C1=CC=C(C=C1)C1=CC=CC=C1C1=CC=CC=C1	22025	230	697	770	7963	C18H14	1853858	230		PUF	5.2677	5.2677	1.163	900	1800	8100	2041	5.52	8.122	-2.602	acute&chronic aq. 1	SPIN, US (10)
p-Terphenyl	1	2828.6	1.77	PUF S1	92-94-4	XJKSTNDFUHDPQJ-UHFFFAOYSA-N	C1=CC=C(C=C1)C1=CC=C(C=C1)C1=CC=CC=C1	3144.8	230	732	801	9082	C18H14	606559	230		PUF	5.2677	5.2677	1.163	900	1800	8100	4422	6.03	8.632	-2.602	vT aq life with long lasting effects	SPIN, US (10)
p-Terphenyl	1	2824.8	1.85	PUF S2	92-94-4	XJKSTNDFUHDPQJ-UHFFFAOYSA-N	C1=CC=C(C=C1)C1=CC=C(C=C1)C1=CC=CC=C1	4693	230	737	803	8673	C18H14	506093	230		PUF	5.2677	5.2677	1.163	900	1800	8100	4422	6.03	8.632	-2.602	vT aq life with long lasting effects	SPIN, US (10)
m-Terphenyl	1	2764	1.77	PUF S1	92-06-8	YJTKZCDBKVTVBY-UHFFFAOYSA-N	C1=CC=C(C=C1)C1=CC(=CC=C1)C1=CC=CC=C1	17028	230	904	917	6586	C18H14	1707179	230		GFF+PUF	5.2677	5.2677	0.845	900	1800	8100	2041	5.52	8.122	-2.602	vT aq life with long lasting effects	SPIN, US (10)
m-Terphenyl	1	2764	1.77	GFF S1	92-06-8	YJTKZCDBKVTVBY-UHFFFAOYSA-N	C1=CC=C(C=C1)C1=CC(=CC=C1)C1=CC=CC=C1	699.55	230	692	757	4907	C18H14	40654	230		GFF+PUF	5.2677	5.2677	0.845	900	1800	8100	2041	5.52	8.122	-2.602	vT aq life with long lasting effects	SPIN, US (10)
m-Terphenyl	1	2764	1.84	PUF S2	92-06-8	YJTKZCDBKVTVBY-UHFFFAOYSA-N	C1=CC=C(C=C1)C1=CC(=CC=C1)C1=CC=CC=C1	14062	230	893	909	4718	C18H14	1300616	230		GFF+PUF	5.2677	5.2677	0.845	900	1800	8100	2041	5.52	8.122	-2.602	vT aq life with long lasting effects	SPIN, US (10)
m-Terphenyl	1	2764	1.77	GFF S2	92-06-8	YJTKZCDBKVTVBY-UHFFFAOYSA-N	C1=CC=C(C=C1)C1=CC(=CC=C1)C1=CC=CC=C1	1590.5	230	700	756	4494	C18H14	154612	230		GFF+PUF	5.2677	5.2677	0.845	900	1800	8100	2041	5.52	8.122	-2.602	vT aq life with long lasting effects	SPIN, US (10)
Dichlofluanid	1	2490.4	1.74	PUF S1	1085-98-9	WURGXGVFSMYFCG-UHFFFAOYSA-N	CN(C)S(=O)(=O)N(SC(F)(Cl)Cl)C1=CC=CC=C1	38899	224	870	872	9560	C9H11Cl2FN2O2S2	3274992	332		GFF+PUF	3.22097	3.22097	0.716	1440	2880	13000	128.3	3.7	9.511	-5.811	Repr. 2	OECD HPV, SPIN, EU (07)
Dichlofluanid	1	2490.4	1.81	PUF S2	1085-98-9	WURGXGVFSMYFCG-UHFFFAOYSA-N	CN(C)S(=O)(=O)N(SC(F)(Cl)Cl)C1=CC=CC=C1	8384.3	224	842	853	9853	C9H11Cl2FN2O2S2	756904	332		GFF+PUF	3.22097	3.22097	0.716	1440	2880	13000	128.3	3.7	9.511	-5.811	Repr. 2	OECD HPV, SPIN, EU (07)
1,9-Benz-10-anthrone	1	3364.4	1.84	PUF S1	82-05-3	HUKPVYBUJRAUAG-UHFFFAOYSA-N	O=C1C2=CC=CC=C2C2=CC=CC3=CC=CC1=C23	6161.5	230	923	930	9874	C17H10O	794336	230		GFF	4.09606	4.09606	0.594	900	1800	8100	180.1	4.81	10.378	-5.568		.
1,9-Benz-10-anthrone	1	3368.2	1.81	GFF S1	82-05-3	HUKPVYBUJRAUAG-UHFFFAOYSA-N	O=C1C2=CC=CC=C2C2=CC=CC3=CC=CC1=C23	23441	230	932	936	9882	C17H10O	3001433	230		GFF	4.09606	4.09606	0.594	900	1800	8100	180.1	4.81	10.378	-5.568		.
1,9-Benz-10-anthrone	1	3364.4	1.86	PUF S2	82-05-3	HUKPVYBUJRAUAG-UHFFFAOYSA-N	O=C1C2=CC=CC=C2C2=CC=CC3=CC=CC1=C23	1694.1	230	755	889	9716	C17H10O	203310	230		GFF	4.09606	4.09606	0.594	900	1800	8100	180.1	4.81	10.378	-5.568		.
1,9-Benz-10-anthrone	1	3368.2	1.82	GFF S2	82-05-3	HUKPVYBUJRAUAG-UHFFFAOYSA-N	O=C1C2=CC=CC=C2C2=CC=CC3=CC=CC1=C23	60917	230	922	924	9717	C17H10O	9760280	230		GFF	4.09606	4.09606	0.594	900	1800	8100	180.1	4.81	10.378	-5.568		.
6H-Benzo[cd]pyren-6-one	1	3904	2.49	GFF S1	3074-00-8	CLIKSBRDCNSYNO-UHFFFAOYSA-N	O=C1C2=CC=CC3=C2C2=C(C=C3)C=CC3=C2C1=CC=C3	18152	254	920	925	9899	C19H10O	2398557	254		GFF	4.42778	4.42778	0.557	1440	2880	13000	387.7	5.31	11.785	-6.475		.
6H-Benzo[cd]pyren-6-one	1	3904	2.5	GFF S2	3074-00-8	CLIKSBRDCNSYNO-UHFFFAOYSA-N	O=C1C2=CC=CC3=C2C2=C(C=C3)C=CC3=C2C1=CC=C3	33464	254	929	934	9899	C19H10O	5674834	254		GFF	4.42778	4.42778	0.557	1440	2880	13000	387.7	5.31	11.785	-6.475		.
Carbamic acid, butyl-, 3-iodo-2-propynyl ester	1	2057.2	1.57	PUF S1	55406-53-6	WYVVKGNFXHOCQV-UHFFFAOYSA-N	CCCCNC(=O)OCC#CI	716.46	182	644	796	9546	C8H12INO2	86673	281		PUF	2.5439	2.5439	0.419	360	720	3240	19.33	2.45	7.759	-5.309	STOT Rep. Exp. 1, acute&chronic aq. 1	HPVIS, SPIN, EU (04), US (10)
Carbamic acid, butyl-, 3-iodo-2-propynyl ester	1			PUF S2	55406-53-6	WYVVKGNFXHOCQV-UHFFFAOYSA-N	CCCCNC(=O)OCC#CI						C8H12INO2			No peakmarker possible	PUF	2.5439	2.5439	0.419	360	720	3240	19.33	2.45	7.759	-5.309	STOT Rep. Exp. 1, acute&chronic aq. 1	HPVIS, SPIN, EU (04), US (10)
Triallate	1	2133.2	1.91	PUF S1	2303-17-5	MWBPRDONLNQCFV-UHFFFAOYSA-N	CC(C)N(C(C)C)C(=O)SCC(Cl)=C(Cl)Cl	15524	86	737	796	9694	C10H16Cl3NOS	6862893	303		GFF+PUF	3.80041	3.80041	0.321	1440	2880	13000	503.6	4.6	7.909	-3.309	STOT Rep. Exp. 2, acute&chronic aq. 1	OECD HPV, SPIN, EU (07)
Triallate	1	2133.2	1.98	PUF S2	2303-17-5	MWBPRDONLNQCFV-UHFFFAOYSA-N	CC(C)N(C(C)C)C(=O)SCC(Cl)=C(Cl)Cl	2278.5	86	544	650	7982	C10H16Cl3NOS	540772	303		GFF+PUF	3.80041	3.80041	0.321	1440	2880	13000	503.6	4.6	7.909	-3.309	STOT Rep. Exp. 2, acute&chronic aq. 1	OECD HPV, SPIN, EU (07)
Carbazole	1	2418.2	1.64	PUF S1	86-74-8	UJOBWOGCFQCDNV-UHFFFAOYSA-N	N1C2=C(C=CC=C2)C2=C1C=CC=C2	14523	167	910	932	9860	C12H9N	2972906	167		GFF+PUF	3.09089	3.09089	0.267	360	720	3240	132.3	3.72	9.044	-5.324	STOT Rep. Exp. 2. carc. 2, chrnic aq. 1	OECD HPV, SPIN, EU (07)
Carbazole	1	2418.2	1.64	GFF S1	86-74-8	UJOBWOGCFQCDNV-UHFFFAOYSA-N	N1C2=C(C=CC=C2)C2=C1C=CC=C2	1520.6	167	768	815	9859	C12H9N	243450	167		GFF+PUF	3.09089	3.09089	0.267	360	720	3240	132.3	3.72	9.044	-5.324	STOT Rep. Exp. 2. carc. 2, chrnic aq. 1	OECD HPV, SPIN, EU (07)
Carbazole	1	2418.2	1.71	PUF S2	86-74-8	UJOBWOGCFQCDNV-UHFFFAOYSA-N	N1C2=C(C=CC=C2)C2=C1C=CC=C2	15802	167	910	929	9827	C12H9N	2890638	167		GFF+PUF	3.09089	3.09089	0.267	360	720	3240	132.3	3.72	9.044	-5.324	STOT Rep. Exp. 2. carc. 2, chrnic aq. 1	OECD HPV, SPIN, EU (07)
Carbazole	1	2418.2	1.65	GFF S2	86-74-8	UJOBWOGCFQCDNV-UHFFFAOYSA-N	N1C2=C(C=CC=C2)C2=C1C=CC=C2	1873.4	167	784	872	9820	C12H9N	346978	167		GFF+PUF	3.09089	3.09089	0.267	360	720	3240	132.3	3.72	9.044	-5.324	STOT Rep. Exp. 2. carc. 2, chrnic aq. 1	OECD HPV, SPIN, EU (07)
Phenanthrene, 3,6-dimethyl-	1	2532.2	1.84	PUF S1	1576-67-6	OMIBPZBOAJFEJS-UHFFFAOYSA-N	CC1=CC2=C(C=C1)C=CC1=C2C=C(C)C=C1	8244.6	206	876	901	8651	C16H14	775474	206			4.97904	4.97904	0.255	900	1800	8100	8259	5.44	8.033	-2.593		.
Phenanthrene, 3,6-dimethyl-	1	2532.2	1.92	PUF S2	1576-67-6	OMIBPZBOAJFEJS-UHFFFAOYSA-N	CC1=CC2=C(C=C1)C=CC1=C2C=C(C)C=C1	5016.7	206	869	877	9173	C16H14	497470	206			4.97904	4.97904	0.255	900	1800	8100	8259	5.44	8.033	-2.593		.
2-(Methylmercapto)benzothiazole	1	1962.2	1.69	PUF S1	615-22-5	UTBVIMLZIRIFFR-UHFFFAOYSA-N	CSC1=NC2=CC=CC=C2S1	2363.3	181	737	805	9827	C8H7NS2	240769	181		PUF	3.42594	3.42594	0.232	360	720	3240	55.64	3.15	9.501	-6.351		.
2-(Methylmercapto)benzothiazole	1	1962.2	1.75	PUF S2	615-22-5	UTBVIMLZIRIFFR-UHFFFAOYSA-N	CSC1=NC2=CC=CC=C2S1	513.12	148	642	716	9786	C8H7NS2	111232	181		PUF	3.42594	3.42594	0.232	360	720	3240	55.64	3.15	9.501	-6.351		.
p-Cresol	2	776.6	1.6	PUF S1				184.83	107	855	890	4413	C7H8O	118998	108			2.1831	2.18291	0.26	360	720	3240	8.851	1.94	6.328	-4.388
Phenol, 2,5-dimethyl-	2	909.6	1.68	GFF S1				86.704	122	656	780	1067	C8H10O	58793	122			2.69652	2.69638	0.1	360	720	3240	16.01	2.33	6.669	-4.339
Phenol, 2,4-dimethyl-	2	913.4	1.67	GFF S2				139.13	122	758	835	9792	C8H10O	98399	122			2.69652	2.69644	0.212	360	720	3240	15.29	2.3	6.71	-4.41
Morpholine, 4-nitroso-	2	959	1.43	GFF S1				149.22	116	844	915	9743	C4H8N2O2	52712	116			-0.179887	-0.179897	0.143	900	1800	8100	3.162	-0.44	5.559	-5.999
Propofol	2	1171.8	1.84	GFF S1				276.4	163	729	776	9606	C12H18O	101673	178			4.1597	4.15965	0.202	900	1800	8100	147.1	3.79	7.852	-4.062
Ethanone, 1-[4-(1-methylethyl)phenyl]-	2	1244	1.78	GFF S1				91.09	147	627	768	7875	C11H14O	42828	162		GFF	2.7759	2.7759	1.622	900	1800	8100	11.17	2.98	6.087	-3.107
Isomer of quinoline	2	1342.8	1.59	PUF S2				184.97	129	728	833	5628	C9H7N	35308	129	RT doesn´t match standard	This isomer not in AA	2.1309	2.12958	0.922	360	720	3240	10.15	2.03	6.196	-4.166
4-Acetylanisole	2	1441.6	1.63	PUF S1				180.98	150	872	894	3253	C9H10O2	46327	150			1.37322	1.37322	0.521	360	720	3240	1.698	1.74	6.365	-4.625
4-Acetylanisole	2	1441.6	1.64	PUF S2				455.42	150	918	918	3844	C9H10O2	94318	150			1.37322	1.37322	0.521	360	720	3240	1.698	1.74	6.365	-4.625
Ethanone, 1-(2,3-dihydro-1H-inden-5-yl)-	2	1445.4	1.74	PUF S1				512.11	145	778	827	4361	C11H12O	76938	160			2.53858	2.53858	1.361	900	1800	8100	14.4	3.15	6.694	-3.544
Ethanone, 1-[4-(1-methylethenyl)phenyl]-	2	1445.4	1.74	GFF S1				316.39	145	692	720	9733	C11H12O	52897	160			2.56699	2.56699	0.201	360	720	3240	13.88	3.12	6.611	-3.491
2,4-dimethoxyamphetamine	2	1472	1.79	PUF S1				804.18	152	742	757	3731	C11H17NO2	157297	195			1.48891	-1.20811	0.043	900	1800	8100	6.632	1.75	8.562	-6.812
Phenol, 2,6-bis(1,1-dimethylethyl)-	2	1513.8	1.95	GFF S1				50218	191	864	865	9754	C14H22O	11412783	206			4.75979	4.75977	0.218	900	1800	8100	491.2	4.92	8.736	-3.816
Phenol, 2,6-bis(1,1-dimethylethyl)-	2	1513.8	1.95	GFF S2				31789	191	866	867	9757	C14H22O	7462970	206			4.75979	4.75977	0.218	900	1800	8100	491.2	4.92	8.736	-3.816
Ethanone, 1-[4-(1-methylethyl)phenyl]-	2	1734.2	1.52	GFF S2				774.35	147	796	815	8530	C11H14O	4036332	162		this isomer not in GFF AA	2.7759	2.7759	1.622	900	1800	8100	11.17	2.98	6.087	-3.107
Ethanone, 1-[4-(1-methylethyl)phenyl]-	2	1806.4	1.49	PUF S1				2294.5	147	808	823	8984	C11H14O	6341538	162		GFF	2.7759	2.7759	1.622	900	1800	8100	11.17	2.98	6.087	-3.107
Ethanone, 1-[4-(1-methylethyl)phenyl]-	2	1810.2	1.53	PUF S2				517.72	147	778	818	7753	C11H14O	1126042	162		GFF	2.7759	2.7759	1.622	900	1800	8100	11.17	2.98	6.087	-3.107
Ethanone, 1-[4-(1-methylethyl)phenyl]-	2	1814	1.48	GFF S1				741.3	147	789	813	8764	C11H14O	2198332	162		GFF	2.7759	2.7759	1.622	900	1800	8100	11.17	2.98	6.087	-3.107
BHA	2	1871	1.59	PUF S1				4036.6	165	719	719	9689	C11H16O2	1002347	180	no std analysed		3.05707	3.05695	0.297	900	1800	8100	57.07	3.5	8.956	-5.456
Ethanone, 1-(3,4-dimethoxyphenyl)-	2	1871	1.65	PUF S2				3205.8	165	880	890	7867	C10H12O3	896229	180			1.21555	1.21555	0.571	900	1800	8100	0.8952	1.32	7.173	-5.853
3,4-dimethoxyphenylacetone	2	1886.2	1.6	PUF S1				1432.1	151	775	828	9550	C11H14O3	336143	194			1.62528	1.62528	0.22	900	1800	8100	2.538	1.12	7.362	-6.242
Coumarin, 7-methyl-	2	1897.6	1.64	PUF S1				8245.9	160	855	898	4016	C10H8O2	909148	160			2.29678	2.29678	0.654	360	720	3240	10.62	2.06	5.564	-3.504
Coumarin, 8-methyl-	2	1897.6	1.7	PUF S2				6343.8	132	867	881	3631	C10H8O2	1943979	160			2.29678	2.29678	0.716	360	720	3240	10.62	2.06	5.564	-3.504
2-Naphthyl methyl ketone	2	1954.6	1.7	PUF S1				11759	155	965	965	4510	C12H10O	2139640	170			2.52037	2.52037	0.54	360	720	3240	9.164	2.85	7.257	-4.407
2-Naphthyl methyl ketone	2	1954.6	1.76	PUF S2				10071	155	961	961	4623	C12H10O	2136623	170			2.52037	2.52037	0.54	360	720	3240	9.164	2.85	7.257	-4.407
2H-1-Benzopyran-2-one, 7-methyl-	2	1958.4	1.63	PUF S1				2046.7	160	859	925	5798	C10H8O2	331168	160			2.29678	2.29678	0.654	360	720	3240	10.62	2.06	5.564	-3.504
2H-1-Benzopyran-2-one, 7-methyl-	2	1958.4	1.69	PUF S2				1630.4	132	842	915	5462	C10H8O2	565625	160			2.29678	2.29678	0.654	360	720	3240	10.62	2.06	5.564	-3.504
1H-Indene, 2,3-dihydro-1,1,3-trimethyl-3-phenyl-	2	2030.6	2.01	PUF S2				5236.6	221	817	825	9838	C18H20	904407	236			5.28887	5.28887	0.985	900	1800	8100	3681	5.91	7.438	-1.528
1,7-di-iso-propylnaphthalene	2	2061	2	PUF S1				1853	212	663	711	2427	C16H20	161460	212			5.45274	5.45274	0.162	900	1800	8100	4778	6.08	7.365	-1.285
1H-Indene, 2,3-dihydro-1,1,3-trimethyl-3-phenyl-	2	2068.6	1.94	PUF S1				24200	221	756	775	9814	C18H20	5524438	236			5.28887	5.28887	0.985	900	1800	8100	3681	5.91	7.438	-1.528
1H-Indene, 2,3-dihydro-1,1,3-trimethyl-3-phenyl-	2	2133.2	1.89	GFF S2				941.29	221	732	766	9803	C18H20	90201	236			5.28887	5.28887	0.985	900	1800	8100	3681	5.91	7.438	-1.528
Positional isomer of 1,1-Bis(3,4-dimethylphenyl)ethane	2	2205.4	1.84	PUF S1				31875	223	841	844	9884	C18H22	4266825	238	RT doesn´t match standard	this isomer not in GFF AA	6.40574	6.40574	0.332	900	1800	8100	7072	6.34	7.753	-1.413
Isomer of dibenzothiophene	2	2209.2	1.76	PUF S1				10008	185	958	958	5169	C12H8S	1020785	184			3.94485	3.94485	1.32	360	720	3240	360.5	4.38	7.24	-2.86
Isomer of dibenzothiophene	2	2209.2	1.82	PUF S2				5188	185	945	945	5245	C12H8S	619503	184			3.94485	3.94485	1.32	360	720	3240	360.5	4.38	7.24	-2.86
Positional isomer of 1,1-Bis(3,4-dimethylphenyl)ethane	2	2235.8	1.8	PUF S1				3750.5	223	688	721	9782	C18H22	524837	238	RT doesn´t match standard	this isomer not in GFF AA	6.40574	6.40574	0.332	900	1800	8100	7072	6.34	7.753	-1.413
Ethanone, 1-[2,3-dihydro-1,1,2,6-tetramethyl-3-(1-methylethyl)-1H-inden-5-yl]-	2	2258.6	2.12	PUF S1				4840.7	215	729	804	9867	C18H26O	855286	258			4.94469	4.94469	0.548	1440	2880	13000	1757	6.31	9.073	-2.763
Isolongifolol	2	2281.4	1.79	GFF S2				3589.2	137	818	819	3877	C15H26O	1892915	222			3.14801	3.14801	0.613	900	1800	8100	209.1	4.02	7.322	-3.302
4-Acetyl-2,6-dimethoxyphenyl acetate	2	2292.8	1.59	GFF S1				515.08	196	762	814	7297	C12H14O5	47512	238			0.82	0.82	0.142	900	1800	8100	1.064	1.43	9.203	-7.773
4-Acetyl-2,6-dimethoxyphenyl acetate	2	2292.8	1.59	GFF S2				2506.6	196	878	888	7656	C12H14O5	310307	238			0.82	0.82	0.142	900	1800	8100	1.064	1.43	9.203	-7.773
3-Phenylbutyrophenone	2	2323.2	1.75	PUF S1				3172.7	224	844	856	7911	C16H16O	312209	224			4.09682	4.09682	0.713	900	1800	8100	81.75	4.29	8.532	-4.242
á-Phenylpropiophenone	2	2330.8	1.71	PUF S1				8279.4	105	837	910	5583	C15H14O	4256306	210			3.8098	3.8098	0.961	900	1800	8100	43.35	3.87	8.237	-4.367
á-Phenylpropiophenone	2	2330.8	1.78	PUF S2				4536.9	105	779	854	3553	C15H14O	3530424	210			3.8098	3.8098	0.961	900	1800	8100	43.35	3.87	8.237	-4.367
p-Dicyclohexylbenzene	2	2353.6	2.03	PUF S1				19984	242	847	865	9855	C18H26	2161439	242	2 isomers detected	PUF	6.20322	6.20322	0.418	900	1800	8100	6559	7.63	7.682	-0.052
p-Dicyclohexylbenzene	2	2353.6	2.11	PUF S2				7202.4	242	828	862	9860	C18H26	676027	242	2 isomers detected	PUF	6.20322	6.20322	0.418	900	1800	8100	6559	7.63	7.682	-0.052
p-Dicyclohexylbenzene	2	2425.8	2.05	PUF S1				12963	242	856	859	9821	C18H26	876490	242	2 isomers detected	this isomer not in PUF AA	6.20322	6.20322	0.418	900	1800	8100	6559	7.63	7.682	-0.052
p-Dicyclohexylbenzene	2	2425.8	2.12	PUF S2				4336.3	242	778	843	9754	C18H26	423348	242	2 isomers detected	this isomer not in PUF AA	6.20322	6.20322	0.418	900	1800	8100	6559	7.63	7.682	-0.052
1,7-Dimethyldibenzothiophene	2	2486.6	1.85	PUF S1				7616.3	212	880	891	2815	C14H12S	687326	212			4.9717	4.9717	0.408	900	1800	8100	1372	5.26	8.117	-2.857
2,6-Dimethyldibenzothiophene	2	2494.2	1.84	PUF S1				7247.7	212	823	880	2999	C14H12S	1055317	212			4.9717	4.9717	0.408	900	1800	8100	1372	5.26	8.117	-2.857
Isodextropimaraldehyde	2	2604.4	2.11	GFF S1				481.42	271	878	878	4753	C20H30O	36476	286			4.90857	4.90857	0.066	1440	2880	13000	5663	6.19	7.71	-1.52
Isodextropimaraldehyde	2	2604.4	2.12	GFF S2				1087.4	271	867	869	6052	C20H30O	95987	286			4.90857	4.90857	0.066	1440	2880	13000	5663	6.19	7.71	-1.52
cyclohexane, [1,1'-biphenyl]-4-yl-	2	2634.8	1.98	PUF S2				3796.4	236	897	932	9170	C18H20	470598	236			5.74	5.74	0.612	900	1800	8100	10100	6.57	8.039	-1.469
Ethanone, 1-phenyl-, (1-phenylethylidene)hydrazone	2	2653.8	1.72	PUF S1				1051.1	118	846	846	9302	C16H16N2	292353	236			3.13055	3.13055	1.198	900	1800	8100	4120	6.79	9.347	-2.557
Naphtho[1,2-c]furan-1,3-dione	2	2767.8	1.71	PUF S2				667.33	198	872	872	1823	C12H6O3	82132	198			2.41206	2.41206	1.289	360	720	3240	64.26	3.24	7.837	-4.597
1-Phenanthrenecarboxylic acid, 1,2,3,4,4a,10a-hexahydro-1,4a-dimethyl-7-(1-methylethyl)-, methyl ester, [1R-(1à,4aá,10aà)]-	2	2900.8	1.9	GFF S1				3506	237	892	894	9626	C21H28O2	445487	312			5.61544	5.61544	0.149	1440	2880	13000	10410	6.59	9.607	-3.017
1-Phenanthrenecarboxylic acid, 1,2,3,4,4a,10a-hexahydro-1,4a-dimethyl-7-(1-methylethyl)-, methyl ester, [1R-(1à,4aá,10aà)]-	2	2900.8	1.9	GFF S2				6121.7	237	919	919	9732	C21H28O2	827947	312			5.61544	5.61544	0.149	1440	2880	13000	10410	6.59	9.607	-3.017
Isomer of p-quaterphenyl	2	3782.4	2.43	GFF S1				6181	306	813	824	9837	C24H18	638929	306	RT doesn´t match standard	GFF	6.91492	6.91492	0.921	900	1800	8100	9646	7.28	11.281	-4.001
Isomer of p-quaterphenyl	2	3782.4	2.43	PUF S2				211.22	306	548	701	9758	C24H18	16163	306	RT doesn´t match standard	GFF	6.91492	6.91492	0.921	900	1800	8100	9646	7.28	11.281	-4.001
Isomer of p-quaterphenyl	2	3782.4	2.43	GFF S2				14118	306	798	811	9837	C24H18	1585262	306	RT doesn´t match standard	GFF	6.91492	6.91492	0.921	900	1800	8100	9646	7.28	11.281	-4.001
Isomer of p-quaterphenyl	2	3782.4	2.51	PUF S1				685.12	306	747	828	9855	C24H18	67178	306	RT doesn´t match standard	GFF	6.91492	6.91492	0.921	900	1800	8100	9646	7.28	11.281	-4.001
Isomer of p-quaterphenyl	2	3942	2.63	GFF S1				290.11	307	603	635	9076	C24H18	24954	306	RT doesn´t match standard	this isomer not in GFF AA	6.91492	6.91492	0.921	900	1800	8100	9646	7.28	11.281	-4.001
L3 Compounds
C a e	3	2539.8	2.14	PUF S1				1118.2	94	686	829	2283	C19H30O3	949527	306	Carbonic acid ester
C a e	3	2840	2.01	GFF S2				516.91	94	739	830	4765	C19H30O3	289662	306	Carbonic acid ester
C a e	3	2931.2	2.02	PUF S1				6388.8	94	879	887	3834	C25H42O3	3993397	390	Carbonic acid ester
C a e	3	2931.2	2.02	GFF S1				12908	94	862	869	2491	C25H42O3	8744944	390	Carbonic acid ester
C a e	3	2931.2	2.03	GFF S2				25645	94	884	895	3659	C23H38O3	22849081	362	Carbonic acid ester
C a e	3	2931.2	2.11	PUF S2				11698	94	879	887	3550	C25H42O3	8649517	390	Carbonic acid ester
C a e	3	2938.8	2.02	PUF S1				5692.3	94	890	899	3361	C23H38O3	2388640	362	Carbonic acid ester
C a e	3	2938.8	2.03	GFF S1				11805	94	894	905	5099	C23H38O3	6147325	362	Carbonic acid ester
C a e	3	2938.8	2.04	GFF S2				23780	94	884	893	3935	C23H38O3	16726370	362	Carbonic acid ester
C a e	3	2938.8	2.11	PUF S2				10029	94	879	889	3470	C23H38O3	5383661	362	Carbonic acid ester
C a e	3	2954	2.02	PUF S1				6027.3	94	855	892	3801	C23H38O3	3026249	362	Carbonic acid ester
C a e	3	2954	2.03	GFF S1				11998	94	810	900	2919	C21H34O3	7347628	334	Carbonic acid ester
C a e	3	2954	2.03	GFF S2				23459	94	856	892	3201	C23H38O3	20137030	362	Carbonic acid ester
C a e	3	2954	2.11	PUF S2				11404	94	867	893	3053	C23H38O3	6979278	362	Carbonic acid ester
C a e	3	2984.4	2.02	PUF S1				6080.5	94	917	917	3201	C21H34O3	3183932	334	Carbonic acid ester
C a e	3	2984.4	2.02	GFF S1				14411	94	880	888	2744	C25H42O3	8110087	390	Carbonic acid ester
C a e	3	2984.4	2.03	GFF S2				28030	94	884	892	3228	C23H38O3	21139877	362	Carbonic acid ester
C a e	3	2984.4	2.1	PUF S2				11652	94	872	895	2690	C23H38O3	6806677	362	Carbonic acid ester
C a e	3	3037.6	2.15	GFF S1				16.152	238	459	711	3623	C11H14O	473.73	162	Carbonic acid ester
C a e	3	3045.2	2.01	PUF S1				5623.1	94	872	883	3350	C23H38O3	6509225	362	Carbonic acid ester
C a e	3	3045.2	2.01	GFF S1				17562	94	937	937	2669	C19H30O3	25413641	306	Carbonic acid ester
C a e	3	3045.2	2.02	GFF S2				32800	94	881	884	2077	C25H42O3	63205068	390	Carbonic acid ester
C a e	3	3045.2	2.1	PUF S2				12014	94	865	870	2355	C23H38O3	19029168	362	Carbonic acid ester
C a e	3	3064.2	2.04	PUF S1				2000.4	94	865	891	3729	C25H42O3	1351760	390	Carbonic acid ester
C a e	3	3064.2	2.14	PUF S2				5200.3	94	880	892	3373	C25H42O3	4406036	390	Carbonic acid ester
C a e	3	3068	2.04	GFF S1				6687.2	94	900	908	4952	C23H38O3	5865754	362	Carbonic acid ester
C a e	3	3068	2.05	GFF S2				12458	94	877	882	3120	C25H42O3	14917538	390	Carbonic acid ester
C a e	3	3094.6	2.04	PUF S1				2437.2	94	856	865	1930	C23H38O3	1281126	362	Carbonic acid ester
C a e	3	3094.6	2.04	GFF S1				10214	94	864	894	3637	C25H42O3	6399043	390	Carbonic acid ester
C a e	3	3094.6	2.06	GFF S2				17941	94	883	889	3726	C25H42O3	17293878	390	Carbonic acid ester
C a e	3	3094.6	2.12	PUF S2				7545.3	94	915	915	2153	C21H34O3	4955261	334	Carbonic acid ester
C a e	3	3102.2	1.95	GFF S1				222.56	94	404	800	613	C16H24O3	89194	264	Carbonic acid ester
C a e	3	3109.8	2	PUF S1				3611.6	94	828	882	2699	C23H38O3	1593559	362	Carbonic acid ester
C a e	3	3109.8	2.01	GFF S2				29516	94	885	887	3130	C23H38O3	26136218	362	Carbonic acid ester
C a e	3	3109.8	2.08	PUF S2				11702	94	926	926	2254	C19H30O3	7257494	306	Carbonic acid ester
C a e	3	3144	2.07	GFF S1				3136.3	94	883	916	4041	C25H42O3	3390823	390	Carbonic acid ester
C a e	3	3144	2.08	GFF S2				5097.9	94	913	913	3472	C21H34O3	7872625	334	Carbonic acid ester
C a e	3	3155.4	2.04	PUF S1				2582.7	94	835	880	1808	C19H30O3	1310766	306	Carbonic acid ester
C a e	3	3155.4	2.04	GFF S1				14706	94	888	894	3531	C23H38O3	9318726	362	Carbonic acid ester
C a e	3	3155.4	2.05	GFF S2				26863	94	926	926	3206	C21H34O3	25380028	334	Carbonic acid ester
C a e	3	3155.4	2.11	PUF S2				9650.9	94	863	866	2197	C23H38O3	6241583	362	Carbonic acid ester
C a e	3	3174.4	2.08	GFF S1				2845	94	871	913	3494	C21H34O3	1596000	334	Carbonic acid ester
C a e	3	3174.4	2.08	GFF S2				5291.6	94	830	886	4242	C25H42O3	3956998	390	Carbonic acid ester
C a e	3	3204.8	2.06	GFF S1				3141.7	94	890	931	4502	C25H42O3	13583515	390	Carbonic acid ester
C a e	3	3204.8	2.07	GFF S2				5187.5	94	835	867	2729	C23H38O3	4078081	362	Carbonic acid ester
C a e	3	3212.4	1.98	GFF S1				10813	94	876	894	3956	C23H38O3	5787398	362	Carbonic acid ester
C a e	3	3212.4	1.99	PUF S1				976.97	94	814	866	2030	C23H38O3	393546	362	Carbonic acid ester
C a e	3	3212.4	1.99	GFF S2				20812	94	883	900	4205	C23H38O3	16058822	362	Carbonic acid ester
C a e	3	3212.4	2.05	PUF S2				6400.4	94	873	890	3483	C23H38O3	3135264	362	Carbonic acid ester
C a e	3	3212.4	2.16	GFF S1				32.417	199	637	772	782	C34H58O4	3609.8	530	Carbonic acid ester
C a e	3	3220	2.02	GFF S1				14837	94	884	890	2962	C23H38O3	7636860	362	Carbonic acid ester
C a e	3	3220	2.03	PUF S1				1518.8	94	859	873	4240	C13H18O3	661064	222	Carbonic acid ester
C a e	3	3220	2.03	GFF S2				26958	94	929	929	2479	C19H30O3	21735222	306	Carbonic acid ester
C a e	3	3220	2.1	PUF S2				8602.5	94	928	928	2569	C19H30O3	4685701	306	Carbonic acid ester
C a e	3	3220	2.23	GFF S1				45.774	293	319	605	534	C23H38O3	1348.9	362	Carbonic acid ester
C a e	3	3242.8	2.1	GFF S1				1275.8	94	850	886	2731	C19H30O3	964112	306	Carbonic acid ester
C a e	3	3242.8	2.1	GFF S2				1893.2	94	854	854	3444	C25H42O3	2929104	390	Carbonic acid ester
C a e	3	3258	2.09	GFF S1				824.65	94	707	831	1982	C14H20O3	348540	236	Carbonic acid ester
C a e	3	3261.8	2.06	GFF S1				4227.3	94	839	929	3308	C21H34O3	2830188	334	Carbonic acid ester
C a e	3	3261.8	2.07	GFF S2				7098.9	94	867	929	3625	C25H42O3	6143848	390	Carbonic acid ester
C a e	3	3261.8	2.13	PUF S2				2657.1	94	743	834	3260	C19H30O3	1466952	306	Carbonic acid ester
C a e	3	3277	1.98	GFF S1				390.24	94	816	887	7642	C18H26O3	142772	290	Carbonic acid ester
C a e	3	3277	1.99	GFF S2				672.88	94	821	839	5589	C18H26O3	591367	290	Carbonic acid ester
C a e	3	3277	2.1	GFF S1				1070.2	94	720	833	4013	C14H20O3	652972	236	Carbonic acid ester
C a e	3	3296	1.97	GFF S1				261.81	94	506	784	1349	C11H14O3	143177	194	Carbonic acid ester
C a e	3	3307.4	2.1	GFF S1				1301.6	94	773	824	2358	C20H32O3	545726	320	Carbonic acid ester
C a e	3	3307.4	2.12	GFF S2				2037.8	94	808	853	2442	C25H42O3	1551100	390	Carbonic acid ester
C a e	3	3311.2	2.11	GFF S1				22.008	211	435	679	167	C17H26O3	814.01	278	Carbonic acid ester
C a e	3	3318.8	2.03	GFF S1				8798.1	94	879	896	4286	C23H38O3	4558485	362	Carbonic acid ester
C a e	3	3318.8	2.04	GFF S2				16040	94	887	905	4492	C23H38O3	11018552	362	Carbonic acid ester
C a e	3	3318.8	2.05	PUF S1				329.82	94	594	726	2114	C25H42O3	107829	390	Carbonic acid ester
C a e	3	3318.8	2.1	PUF S2				4846.8	94	838	902	3866	C23H38O3	2364667	362	Carbonic acid ester
C a e	3	3326.4	2.09	GFF S1				4412.3	94	819	858	1591	C23H38O3	2211988	362	Carbonic acid ester
C a e	3	3326.4	2.09	GFF S2				7409.5	94	888	923	2472	C21H34O3	5782678	334	Carbonic acid ester
C a e	3	3326.4	2.15	PUF S2				2412.9	94	855	886	2638	C23H38O3	1344988	362	Carbonic acid ester
C a e	3	3337.8	2.09	PUF S2				153.25	94	573	841	4229	C14H20O3	287377	236	Carbonic acid ester
C a e	3	3349.2	2.03	GFF S1				375.08	94	564	846	2514	C18H26O3	280313	290	Carbonic acid ester
C a e	3	3360.6	2.06	GFF S2				579.8	94	596	757	638	C18H26O3	513576	290	Carbonic acid ester
C a e	3	3364.4	2.18	GFF S1				997.3	94	782	865	2900	C19H30O3	771014	306	Carbonic acid ester
C a e	3	3364.4	2.19	GFF S2				1644	94	824	874	2122	C23H38O3	1581839	362	Carbonic acid ester
C a e	3	3375.8	2.09	GFF S1				487.83	94	837	837	3409	C25H42O3	840323	390	Carbonic acid ester
C a e	3	3375.8	2.1	GFF S2				713.34	94	886	899	6075	C18H26O3	515207	290	Carbonic acid ester
C a e	3	3398.6	0.97	PUF S1				91.762	106	585	809	1065	C17H14O4	17741	282	Carbonic acid ester
C a e	3	3398.6	2.09	GFF S1				513.08	94	860	908	6531	C18H26O3	229078	290	Carbonic acid ester
C a e	3	3398.6	2.09	GFF S2				843.1	94	888	909	6557	C18H26O3	871742	290	Carbonic acid ester
C a e	3	3410	2.14	GFF S1				31.787	289	430	785	1689	C19H30O3	1671.7	306	Carbonic acid ester
C a e	3	3413.8	2.18	PUF S2				141.25	94	604	804	2383	C18H26O3	163229	290	Carbonic acid ester
C a e	3	3421.4	2.21	GFF S1				2629.6	94	864	886	3694	C23H38O3	1182863	362	Carbonic acid ester
C a e	3	3421.4	2.21	GFF S2				4358.8	94	860	892	3163	C23H38O3	3503892	362	Carbonic acid ester
C a e	3	3429	2.26	GFF S1				1470.9	94	916	916	2957	C19H30O3	593497	306	Carbonic acid ester
C a e	3	3429	2.27	GFF S2				2082.7	94	921	921	2159	C21H34O3	1703030	334	Carbonic acid ester
C a e	3	3451.8	2.17	GFF S2				339.81	94	451	730	1135	C18H26O3	1251529	290	Carbonic acid ester
C a e	3	3451.8	2.19	PUF S2				103.72	94	582	821	1898	C13H18O3	127974	222	Carbonic acid ester
C a e	3	3463.2	2.18	GFF S1				475.86	94	756	853	3370	C18H26O3	652910	290	Carbonic acid ester
C a e	3	3474.6	2.25	GFF S2				332.39	94	552	779	1658	C16H24O3	570862	264	Carbonic acid ester
C a e	3	3478.4	2.27	GFF S1				297.96	94	627	788	3220	C25H42O3	202348	390	Carbonic acid ester
C a e	3	3478.4	2.28	GFF S2				32.893	302	561	819	1332	C18H26O3	1525.1	290	Carbonic acid ester
C a e	3	3478.4	2.3	PUF S2				113.92	94	546	798	3566	C18H26O3	87005	290	Carbonic acid ester
C a e	3	3501.2	2.29	GFF S1				350.94	94	819	819	5301	C18H26O3	389967	290	Carbonic acid ester
C a e	3	3501.2	2.29	GFF S2				486.51	94	919	919	8489	C18H26O3	564646	290	Carbonic acid ester
C a e	3	3501.2	2.3	PUF S2				150.41	94	601	798	1619	C19H30O3	160973	306	Carbonic acid ester
C a e	3	3512.6	2.3	PUF S2				89.42	94	570	843	1623	C13H18O3	115926	222	Carbonic acid ester
C a e	3	3516.4	2.21	GFF S2				153.33	286	630	826	3965	C18H26O3	21157	290	Carbonic acid ester
C a e	3	3524	2.34	PUF S2				81.791	94	538	850	1585	C13H18O3	38696	222	Carbonic acid ester
C a e	3	3524	2.43	GFF S1				865.22	94	921	921	3160	C21H34O3	499643	334	Carbonic acid ester
C a e	3	3524	2.44	GFF S2				1279	94	753	840	1942	C23H38O3	931419	362	Carbonic acid ester
C a e	3	3524	2.45	PUF S2				527.59	94	822	862	2470	C21H34O3	267546	334	Carbonic acid ester
C a e	3	3531.6	2.36	PUF S2				71.338	94	393	779	1109	C11H14O3	35732	194	Carbonic acid ester
C a e	3	3565.8	2.36	PUF S2				88.957	94	469	845	3685	C16H24O3	72136	264	Carbonic acid ester
C a e	3	3584.8	2.3	GFF S2				414.97	94	837	861	4891	C18H26O3	207778	290	Carbonic acid ester
C a e	3	3588.6	2.43	PUF S2				39.933	94	419	808	4996	C13H18O3	21412	222	Carbonic acid ester
C a e	3	3630.4	2.52	PUF S2				45.497	94	349	776	1005	C13H18O3	92746	222	Carbonic acid ester
C a e	3	3634.2	2.52	GFF S2				166.4	94	507	763	1143	C18H26O3	470984	290	Carbonic acid ester
C a e	3	3687.4	2.6	PUF S2				51.224	94	382	769	1197	C18H26O3	32243	290	Carbonic acid ester
Esters	3	1570.8	2.42	GFF S1				103.69	112	816	816	6360	C17H34O2	55393	270	Hexanoic acid ester
Esters	3	1570.8	2.42	GFF S2				61.419	112	850	850	7487	C17H34O2	40869	270	Hexanoic acid ester
C a e	3	1631.6	2.29	PUF S1				185.15	90	828	892	700	C14H26O3	32884	242	Carbonic acid ester
Esters	3	1654.4	1.69	PUF S2				1472.3	163	762	817	2115	C11H10O4	528876	206	Terephthalic acid ester
Esters	3	1776	1.9	GFF S1				188.11	115	808	888	1469	C13H24O4	233219	244	Glutaric acid ester m(x)~189
Esters	3	1787.4	1.96	GFF S1				1937.9	185	927	927	4028	C14H26O4	212105	258	Hexanedioic acid ester
Esters	3	1787.4	1.96	GFF S2				1780.8	185	916	916	3314	C14H26O4	205422	258	Hexanedioic acid ester
Esters	3	1798.8	2.52	GFF S1				54.387	96	815	815	789	C18H32O4	49670	312	Oxalic acid ester
Esters	3	2045.8	2.1	PUF S2				40493	119	885	885	3835	C16H24O2	27832455	248	Toluic- or Benzoic acid ester
Esters	3	2049.6	2.03	PUF S1				51401	119	887	887	3956	C16H24O2	90321083	248	Toluic- or Benzoic acid ester
Esters	3	2057.2	2.26	PUF S1				56993	74	931	931	8048	C17H34O2	141947163	270	Hexadecanoic a e
Esters	3	2064.8	2	GFF S1				1480.2	105	817	863	3620	C14H20O2	1008579	220	Benzoic acid ester
Esters	3	2064.8	2	GFF S2				1112.5	105	857	907	4367	C14H20O2	881573	220	Benzoic acid ester
Esters	3	2095.2	2.06	GFF S1				301.03	105	842	842	6780	C17H26O2	342873	262	Benzoic acid ester
Esters	3	2102.8	2	GFF S2				1164.9	123	850	861	2061	C20H32O2	765679	304	Benzoic acid ester
Esters	3	2106.6	2.05	GFF S1				10981	105	889	889	7847	C17H26O2	7656458	262	Benzoic acid ester
Esters	3	2106.6	2.05	GFF S2				7680.5	105	887	887	7909	C17H26O2	5809262	262	Benzoic acid ester
Esters	3	2220.6	2.38	GFF S1				295.48	145	832	868	3336	C20H40O2	109310	312	Hexadecanoic acid ester
C a e	3	2266.2	2.11	GFF S1				3062	94	778	847	1623	C17H26O3	1467493	278	Carbonic acid ester
C a e	3	2266.2	2.12	PUF S1				35752	94	807	854	3211	C11H14O3	24338688	194	Carbonic acid ester
C a e	3	2266.2	2.12	GFF S2				1173.5	94	711	851	4386	C18H26O3	623709	290	Carbonic acid ester
C a e	3	2266.2	2.2	PUF S2				10076	94	806	858	1501	C14H20O3	4606662	236	Carbonic acid ester
C a e	3	2270	2.19	PUF S2				1611.4	94	648	816	3339	C18H26O3	711720	290	Carbonic acid ester
Esters	3	2327	2.35	GFF S1				459.19	56	805	809	3892	C20H40O2	422225	312	Hexadecanoic acid ester
Esters	3	2437.2	1.47	GFF S1				583.7	99	823	823	3642	C19H34O2	321866	294	Hexanedioic acid ester
Esters	3	2726	2.19	GFF S1				66026	129	925	925	5238	C22H42O4	46193972	370	Hexanedioic acid ester
Halogenated	3	1810.2	1.77	PUF S1				1867.2	220	646	706	5172	C7H6BrClO	142013	220	2-Bromo-4-chloroanisole
Halogenated	3	1810.2	1.82	PUF S2				807.83	220	548	651	2060	C7H6BrClO	49155	220	2-Bromo-4-chloroanisole
Halogenated	3	2878	0.97	PUF S1				115.19	281	637	719	5759	C14H13Cl2NO	6706.9	281	4[h]-Pyridone, 1-benzyl-3,5-dichloro-2,6-dimethyl-
Misc	3	822.2	1.58	PUF S1				5264.1	105	943	944	9796	C8H8O	7267011	120	Acetophenone
Misc	3	852.6	1.56	PUF S1				66.348	120	736	813	9697	C8H8O	14061	120	Acetophenone
Misc	3	1023.6	1.64	PUF S1				186.45	132	854	881	6134	C9H8O	51681	132	2-Phenylpropenal
Misc	3	1156.6	1.63	PUF S1				2172.7	139	808	846	7296	C7H9NO2	651602	139	1H-Pyrrole-2,5-dione, 3-ethyl-4-methyl-
Misc	3	1441.6	1.63	PUF S1				180.98	150	832	882	5926	C9H10O2	46327	150	3-Methoxyacetophenone
Misc	3	1449.2	1.6	PUF S1				197.87	149	764	877	9190	C8H6O3	57236	150	Piperonal
Misc	3	1449.2	1.6	PUF S1				197.87	149	842	935	9642	C8H6O3	57236	150	Piperonal
Misc	3	1449.2	1.7	PUF S1				463.06	178	834	859	9814	C11H14O2	68708	178	4-allyl-1,2-(dimethoxy)-benzene
Misc	3	1491	2.37	PUF S1				96.824	88	908	908	9883	C16H32O2	35422	256	2-Ethylhexyl 2-ethylhexanoate
Misc.	3	822.2	1.56	PUF S2				1459.9	105	939	945	9804	C8H8O	1936440	120	Acetophenone
Misc.	3	898.2	1.53	GFF S1				108.58	99	660	836	2667	C7H12O2	84063	128	2(3H)-Furanone, 5-ethyldihydro-3-methyl-
Misc.	3	1023.6	1.59	PUF S2				54.862	132	813	902	7164	C9H8O	14285	132	2-Phenylpropenal
Misc.	3	1156.6	1.6	PUF S2				3696.8	139	867	889	8895	C7H9NO2	996828	139	1H-Pyrrole-2,5-dione, 3-ethyl-4-methyl-
Misc.	3	1255.4	1.6	GFF S1				60.066	135	616	825	7366	C8H8O2	16104	136	4-methoxybenzaldehyde
Misc.	3	1396	1.24	PUF S2				48.588	105	594	822	8796	C8H8O	1042359	120	Acetophenone
Misc.	3	1449.2	1.61	PUF S2				184.23	149	843	918	9492	C8H6O3	49125	150	Piperonal
Misc.	3	1449.2	1.71	PUF S2				543.18	178	798	865	9661	C11H14O2	107340	178	4-allyl-1,2-(dimethoxy)-benzene
Misc.	3	1472	1.67	PUF S2				220.42	167	725	755	7029	C10H14O3	29687	182	Benzene, 1,2,3-trimethoxy-5-methyl-
Misc.	3	1639.2	1.57	PUF S1				365.98	65	768	802	3114	C6H6N2O2	275078	138	p-Nitroaniline
Misc.	3	1722.8	1.67	PUF S1				7009.4	163	809	809	5790	C11H14O2	2162072	178	Ethanone, 1-[4-(1-hydroxy-1-methylethyl)phenyl]-
Misc.	3	1764.6	1.14	GFF S2				38.801	120	616	789	8837	C8H8O	330369	120	Acetophenone
Misc.	3	1768.4	1.16	PUF S2				348.02	105	823	899	9651	C8H8O	7568664	120	Acetophenone
Misc.	3	1772.2	1.78	PUF S2				8195.1	111	926	934	7735	C11H16O2	3902416	180	2(4H)-Benzofuranone, 5,6,7,7a-tetrahydro-4,4,7a-trimethyl-
Misc.	3	1814	1.53	PUF S2				499.77	147	648	740	6533	C11H14O	1977479	162	Ethanone, 1-[4-(1-methylethyl)phenyl]-
Misc.	3	1905.2	1.64	PUF S1				5868.2	103	853	872	8949	C9H8O	2679022	132	trans-Cinnamaldehyde
Misc.	3	1905.2	1.7	PUF S2				3681.3	103	845	851	5266	C9H8O	1828282	132	trans-Cinnamaldehyde
Misc.	3	1909	2.29	PUF S1				2803.3	91	917	917	7944	C19H32	4449157	260	Benzene, (1-pentyloctyl)-
Misc.	3	1909	2.36	PUF S2				1971.7	91	806	864	4888	C19H32	3199431	260	Benzene, (1-pentyloctyl)-
Misc.	3	1912.8	1.89	PUF S1				1056.9	210	824	852	5910	C16H18	183388	210	Benzene, 1,1'-(1-methyl-1,3-propanediyl)bis-
Misc.	3	1924.2	1.67	PUF S2				1015.2	196	734	745	9143	C10H12O4	133858	196	3,4,5-Trimethoxybenzaldehyde
Misc.	3	1950.8	1.63	PUF S1				2652.7	167	734	759	1771	C10H14O3	297044	182	5-tert-Butylpyrogallol
Misc.	3	1950.8	1.69	PUF S2				3477.4	182	758	769	5109	C12H19NO3	383275	225	2,4,5-Trimethoxyamphetamine
Misc.	3	1985	1.66	PUF S2				53523	131	847	847	2084	C11H12O	18774274	160
Misc.	3	2004	1.63	PUF S1				1865.6	165	894	912	6653	C11H14O3	359778	194
Misc.	3	2057.2	1.78	PUF S1				2751.4	180	780	856	2605	C14H12	550625	180	Stilbene
Misc.	3	2076.2	1.7	PUF S1				4971.6	146	845	857	2117	C10H10O	859315	146	Cinnamaldehyde, á-methyl-
Misc.	3	2106.6	1.58	PUF S1				5742.1	200	766	766	1446	C8H12N2O2S	720460	200	Sulfamide, N,N-dimethyl-N'-phenyl-
Misc.	3	2148.4	1.67	PUF S2				2009.7	191	877	877	9450	C12H14O3	458733	206	3,4-Dimethoxybenzylideneacetone
Misc.	3	2159.8	1.91	PUF S1				10442	91	862	865	8339	C18H20	11003035	236
Misc.	3	2178.8	1.56	PUF S1				4026.6	182	848	855	3211	C11H12O5	477599	224	4-Acetoxy-3,5-dimethoxybenzaldehyde
Misc.	3	2178.8	1.56	GFF S1				247.82	182	623	729	2190	C11H12O5	27055	224	4-Acetoxy-3,5-dimethoxybenzaldehyde
Misc.	3	2178.8	1.56	GFF S2				956.28	182	797	824	3522	C11H12O5	110954	224	4-Acetoxy-3,5-dimethoxybenzaldehyde
Misc.	3	2178.8	1.63	PUF S2				1036.6	182	772	783	3957	C11H12O5	104389	224	4-Acetoxy-3,5-dimethoxybenzaldehyde
Misc.	3	2213	2.29	PUF S1				131.38	286	652	740	794	C13H18O2	14893	206	Dioxolane
Misc.	3	2273.8	2.26	PUF S1				7286.3	257	885	885	6468	C20H34O	1243771	290	1H-Naphtho[2,1-b]pyran, 3-ethenyldodecahydro-3,4a,7,7,10a-pentamethyl-, [3R-(3à,4aá,6aà,10aá,10bà)]-
Misc.	3	2292.8	1.59	GFF S1				515.08	196	883	891	5377	C12H14O5	47512	238	4-Acetyl-2,6-dimethoxyphenyl acetate
Misc.	3	2292.8	1.59	GFF S2				2506.6	196	917	917	7593	C12H14O5	316732	238	4-Acetyl-2,6-dimethoxyphenyl acetate
Misc.	3	2300.4	2.29	PUF S1				35021	275	894	894	7550	C20H34O	7462748	290	1H-Naphtho[2,1-b]pyran, 3-ethenyldodecahydro-3,4a,7,7,10a-pentamethyl-, [3R-(3à,4aá,6aà,10aá,10bà)]-
Misc.	3	2311.8	1.66	PUF S1				5976	105	982	982	560	C14H10O2	3262218	210	Ethanedione, diphenyl-
Misc.	3	2323.2	2.23	PUF S2				165.87	270	609	710	9888	C8H9NO2	19611	151	Acetaminophen
Misc.	3	2387.8	1.78	GFF S1				16855	77	731	797	1643	C9H12	21097666	120	Benzene, 1,2,4-trimethyl-
Misc.	3	2387.8	1.84	PUF S2				43490	120	795	830	7319	C13H20O2	29379570	208	Peroxide, 1,1-dimethylethyl 1-methyl-1-phenylethyl
Misc.	3	2387.8	1.86	PUF S2				37605	238	729	746	3814	C18H22	3984049	238	Benzene, 1,1'-(1,4-dimethyl-1,4-butanediyl)bis-
Misc.	3	2403	1.71	GFF S2				5681.4	186	722	755	2060	C12H15N3	909532	201	1,2,4,4,6-Pentamethyl-1,4-dihydropyridine-3,5-dicarbonitrile
Misc.	3	2422	1.56	PUF S1				474.74	180	672	693	2864	C9H12N2O2	73909	180	Benzenamine, N-ethyl-2-methyl-5-nitro-
Misc.	3	2422	1.9	PUF S1				3801.7	193	809	852	5509	C16H16	1687927	208	Benzene, 1,1'-ethenylidenebis-[4-methyl-
Misc.	3	2460	1.88	GFF S1				355.67	57	616	639	8184	C15H24O	422651	220	Butylated Hydroxytoluene
Misc.	3	2524.6	1.76	GFF S2				302.66	192	643	758	8096	C14H11N	130332	193	Iminostilbene
Misc.	3	2604.4	2.11	PUF S1				1930.9	271	880	880	3839	C20H30O	162341	286	(1R,4aR,4bS,7R,10aR)-1,4a,7-Trimethyl-7-vinyl-1,2,3,4,4a,4b,5,6,7,9,10,10a-dodecahydrophenanthrene-1-carbaldehyde
PAC	3	1297.2	1.78	PUF S2				202.2	142	688	826	9643	C11H10	41504	142	Me-PAH
PAC	3	1529	1.79	PUF S1				345.34	154	626	787	3648	C12H10	79909	154	PAH, not Biphenyl
PAC	3	1529	1.8	PUF S2				805.01	154	648	679	4940	C12H10	191951	154	PAH, not Biphenyl
PAC	3	1578.4	1.71	PUF S1				2594.8	179	820	842	7859	C12H18O2	408487	194
PAC	3	1608.8	1.8	PUF S1				1411.1	168	763	820	4449	C13H12	213271	168	PAH Me Biphenyl
PAC	3	1608.8	1.83	PUF S2				977.14	168	741	832	3193	C13H12	104944	168	PAH Me Biphenyl
PAC	3	1635.4	1.74	PUF S1				665.06	152	777	871	9828	C12H8	210447	152	PAH
PAC	3	1635.4	1.74	GFF S2				587.66	152	662	777	9390	C12H8	240642	152
PAC	3	1696.2	1.93	PUF S2				563.01	170	865	865	2144	C13H14	56961	170	TriMe PAH
PAC	3	1753.2	1.14	PUF S1				1225.8	105	871	913	9210	C8H8O	32325072	120	PAH
PAC	3	1772.2	1.83	PUF S1				803.7	182	790	845	1635	C14H14	110660	182
PAC	3	1776	1.65	PUF S1				5165.8	160	823	864	1915	C10H8O2	765146	160
PAC	3	1776	1.7	PUF S2				4779.1	160	854	901	2960	C10H8O2	832536	160
PAC	3	1783.6	1.67	PUF S1				2517.3	156	941	949	8140	C11H8O	455879	156
PAC	3	1783.6	1.71	PUF S2				687.04	156	746	766	1578	C11H8O	118323	156
PAC	3	1787.4	1.81	PUF S2				1696.4	168	800	848	7478	C12H8O	304936	168
PAC	3	1821.6	1.63	PUF S1				2390.2	160	834	870	4129	C10H8O2	356653	160
PAC	3	1821.6	1.68	PUF S2				2514.1	160	901	901	3971	C10H8O2	382210	160
PAC	3	1863.4	1.83	PUF S1				1413.2	182	855	877	1391	C14H14	278923	182
PAC	3	1863.4	1.89	PUF S2				509.38	182	808	857	1137	C14H14	61746	182	DiMe PAH
PAC	3	1886.2	1.83	PUF S1				8414.9	182	935	939	4124	C13H10O	1713443	182
PAC	3	1886.2	1.88	PUF S2				6596	182	882	885	3566	C13H10O	1287405	182
PAC	3	1905.2	1.84	PUF S1				16929	181	887	890	3001	C13H10O	4309657	182
PAC	3	1905.2	1.9	PUF S2				13403	181	895	899	4271	C13H10O	3748366	182
PAC	3	1920.4	1.86	PUF S1				2113.2	196	836	880	3239	C15H16	174055	196
PAC	3	1935.6	1.72	PUF S1				3042.8	147	735	792	3632	C13H18O	1564485	190
PAC	3	1935.6	1.78	PUF S2				3239.2	147	744	772	9331	C13H18O	1688229	190
PAC	3	1935.6	1.86	PUF S1				3763.3	196	842	896	2582	C15H16	699535	196
PAC	3	1947	1.82	PUF S1				3118.4	182	826	872	5311	C13H10O	660439	182
PAC	3	1950.8	1.83	PUF S2				723.1	166	645	766	9857	C13H10	81798	166	PAH, not Fluorene
PAC	3	1954.6	1.96	PUF S1				89784	221	834	835	9751	C18H20	38828976	236
PAC	3	1969.8	2.21	PUF S2				891.35	221	640	769	9580	C16H28O	155974	236
PAC	3	2030.6	1.94	PUF S1				21809	221	828	831	9855	C18H20	3721203	236
PAC	3	2030.6	2.01	PUF S2				5236.6	221	814	820	9842	C18H20	904407	236
PAC	3	2045.8	1.84	PUF S2				1687.2	188	809	843	5115	C12H12O2	240762	188
PAC	3	2068.6	2	PUF S2				6797.7	221	704	727	9597	C18H20	1463821	236
PAC	3	2087.6	1.67	PUF S1				61970	140	931	941	9441	C12H8O	9788154	168	PAH
PAC	3	2087.6	1.74	PUF S2				57535	140	926	936	9386	C12H8O	9894737	168	PAH
PAC	3	2095.2	1.93	PUF S1				1392.6	128	684	707	9828	C18H20	377121	236
PAC	3	2099	1.7	PUF S1				2739.1	179	850	850	1664	C13H9N	658820	179
PAC	3	2102.8	1.93	PUF S1				13407	221	796	809	6328	C18H20	1957338	236
PAC	3	2102.8	2	PUF S2				1385.2	236	778	796	9760	C18H20	170117	236
PAC	3	2114.2	1.87	PUF S1				4881.5	196	823	830	7066	C14H12O	1197817	196
PAC	3	2114.2	1.91	PUF S1				14867	221	738	756	3498	C18H20	3435657	236
PAC	3	2133.2	1.89	PUF S1				71765	221	842	843	6233	C18H20	16118569	236
PAC	3	2133.2	1.89	PUF S1				71765	221	858	858	9754	C18H20	16118569	236
PAC	3	2133.2	1.89	GFF S1				953.64	221	695	717	9656	C18H20	110540	236
PAC	3	2133.2	1.96	PUF S2				34207	221	868	871	9806	C18H20	5239584	236
PAC	3	2140.8	1.58	GFF S2				400.76	164	835	911	7493	C8H8N2S	84955	164	Thiazole
PAC	3	2159.8	1.74	PUF S1				16501	169	877	905	8019	C13H12O	2553015	184
PAC	3	2159.8	1.81	PUF S2				8627.6	169	805	899	7481	C13H12O	1486940	184
PAC	3	2163.6	1.91	PUF S1				31892	221	761	812	9798	C18H20	6402548	236	or L4 pos mol formula
PAC	3	2190.2	1.89	PUF S1				5238.1	91	746	748	4419	C18H20	9279398	236
PAC	3	2190.2	1.96	PUF S2				27512	221	859	861	9759	C18H20	3579119	236
PAC	3	2194	1.75	PUF S2				58.282	216	634	704	9798	C12H8	3206.6	152	PAH
PAC	3	2201.6	1.99	PUF S2				3368.9	221	651	659	9240	C18H20	584793	236
PAC	3	2220.6	1.94	PUF S2				6402.1	179	885	903	3562	C15H14	2441783	194
PAC	3	2224.4	1.74	PUF S1				9286.1	184	834	859	2646	C12H8S	1317631	184
PAC	3	2235.8	1.85	PUF S1				4143.7	194	800	855	4794	C15H14	1433731	194
PAC	3	2239.6	1.71	PUF S1				2591.8	181	829	885	4774	C14H12O	277945	196
PAC	3	2239.6	1.78	PUF S2				2272.2	181	853	872	4316	C14H12O	381829	196
PAC	3	2243.4	1.72	PUF S1				3591.3	182	738	826	4649	C12H10N2	882244	182
PAC	3	2243.4	1.79	PUF S2				3649.4	182	765	840	5101	C12H10N2	946297	182
PAC	3	2251	1.78	PUF S1				132479	178	774	775	9786	C14H10	80700183	178	PAH
PAC	3	2251	1.85	PUF S2				27047	88	904	917	9883	C14H10	21365762	178	PAH
PAC	3	2254.8	1.76	PUF S1				18249	151	923	934	6626	C14H10	12691970	178	PAH
PAC	3	2254.8	1.81	PUF S2				127515	178	890	890	9880	C14H10	118840916	178	PAH
PAC	3	2262.4	1.77	PUF S1				74748	178	956	969	9892	C14H10	20178003	178	PAH
PAC	3	2262.4	1.84	PUF S2				80497	178	966	980	9892	C14H10	16380349	178	PAH
PAC	3	2262.4	1.93	PUF S2				3381	194	801	851	5835	C15H14	882035	194
PAC	3	2285.2	1.78	PUF S2				2562.5	182	726	798	4662	C12H10N2	393659	182	mainlib Hit or Hit2 2.3-Dihydro-1-oxo-1H-phenalene
PAC	3	2285.2	1.93	PUF S2				3025.5	194	884	922	2729	C15H14	547994	194
PAC	3	2296.6	1.84	PUF S2				24958	194	867	896	1626	C14H10O	4475315	194
PAC	3	2323.2	2.06	GFF S2				10986	159	809	809	2269	C19H28	2700790	256
PAC	3	2334.6	1.81	PUF S1				18150	197	920	930	3872	C13H10S	3872923	198
PAC	3	2334.6	1.87	PUF S2				8320.2	197	933	933	3176	C13H10S	1646966	198
PAC	3	2349.8	1.74	PUF S1				33.638	72	659	702	9860	C16H10	10267	202	PAH
PAC	3	2349.8	1.75	PUF S1				78617	204	926	939	1803	C16H12	9000129	204
PAC	3	2349.8	1.81	PUF S2				60309	204	945	950	2927	C16H12	7010589	204	ethyl PAH
PAC	3	2353.6	1.67	PUF S1				3694.1	182	820	846	6462	C13H10O	855346	182
PAC	3	2353.6	1.74	PUF S2				2976.3	182	821	839	4956	C13H10O	542836	182	mainlib Hit or Hit with C13H10O
PAC	3	2357.4	1.82	PUF S2				362.58	204	868	913	4515	C14H10O	68003	194
PAC	3	2361.2	1.75	PUF S1				749.11	196	813	895	2731	C14H10O	155956	194
PAC	3	2376.4	1.84	PUF S2				15975	194	812	855	1445	C14H10O	3637330	194
PAC	3	2380.2	1.76	PUF S1				12351	194	827	891	1586	C14H10O	2935172	194
PAC	3	2395.4	1.81	PUF S1				33295	191	908	928	1792	C15H12	12171191	192	Me PAH
PAC	3	2395.4	1.81	GFF S1				933.66	192	765	824	1303	C15H12	143633	192	PAH Me-Phen/Anthr
PAC	3	2395.4	1.81	GFF S2				1773.8	192	792	832	2318	C15H12	321304	192
PAC	3	2395.4	1.88	PUF S2				30690	191	919	936	2633	C15H12	10298652	192	Me PAH
PAC	3	2406.8	1.88	PUF S2				69630	192	930	947	1988	C15H12	23156375	192	Me-Phen or Me-Anthr
PAC	3	2410.6	1.8	PUF S1				94336	192	902	921	1738	C15H12	30381066	192	Me PAH
PAC	3	2414.4	1.67	PUF S1				6532.7	182	825	833	4777	C13H10O	1025260	182
PAC	3	2422	1.83	PUF S2				3392.1	164	836	863	3076	C14H10O	1017942	194
PAC	3	2433.4	1.72	PUF S1				2420.4	207	842	864	6956	C16H14O	744344	222
PAC	3	2441	1.74	PUF S2				1793.1	182	764	811	4399	C12H10N2	483407	182	mainlib Hit or 2.3-Dihydro-1-oxo-1H-phenalene
PAC	3	2441	1.88	PUF S2				6650	192	803	849	1656	C15H12	917369	192	Me-Phen or Me-Anthr
PAC	3	2452.4	1.79	PUF S1				62761	192	911	932	1512	C15H12	12293117	192	Me PAH
PAC	3	2452.4	1.79	GFF S1				793.94	192	668	747	1355	C15H12	97334	192	PAH Me-Phen/Anthr
PAC	3	2452.4	1.87	PUF S2				52202	192	920	937	1654	C15H12	8360872	192	Me PAH
PAC	3	2463.8	1.79	PUF S1				97367	192	911	934	2304	C15H12	25981583	192	Me PAH
PAC	3	2463.8	1.84	PUF S1				20629	212	910	910	2343	C14H12S	1914430	212
PAC	3	2463.8	1.86	PUF S2				78753	192	925	944	2460	C15H12	21018457	192	Me PAH
PAC	3	2463.8	1.91	PUF S2				7280.7	212	839	858	1985	C14H12S	623344	212
PAC	3	2471.4	1.78	PUF S1				120973	190	905	905	4899	C15H10	26023522	190
PAC	3	2471.4	1.78	GFF S1				978.67	190	823	907	6162	C15H10	175188	190	PAH
PAC	3	2471.4	1.78	GFF S2				2728.3	190	903	935	6680	C15H10	580142	190
PAC	3	2471.4	1.85	PUF S2				97488	190	910	910	5227	C15H10	21760447	190
PAC	3	2475.2	1.66	PUF S1				4583.5	182	813	829	4835	C13H10O	688139	182
PAC	3	2475.2	1.73	PUF S2				5086.2	182	803	816	3363	C13H10O	819705	182	mainlib Hit or Hit3 Styrylpyridazine
PAC	3	2479	1.76	PUF S1				5010.1	203	850	872	5017	C17H14	996290	218
PAC	3	2486.6	1.7	PUF S1				1506	180	835	869	2434	C13H11N	154093	181
PAC	3	2501.8	1.74	PUF S1				6948.7	221	731	736	9602	C18H20	1003734	236
PAC	3	2501.8	1.82	PUF S2				1474.2	221	656	676	9633	C18H20	265894	236
PAC	3	2509.4	1.74	PUF S1				91.937	192	829	835	3282	C14H12O	16847	196
PAC	3	2509.4	1.91	PUF S2				4490	206	926	930	9528	C16H14	884170	206	Et PAH
PAC	3	2513.2	1.83	PUF S1				7326.1	206	868	912	8561	C16H14	1316646	206	Et PAH
PAC	3	2513.2	1.88	PUF S2				2169.4	208	845	866	3547	C15H12O	1256816	208
PAC	3	2513.2	1.91	PUF S2				4452.5	206	873	896	8346	C16H14	884170	206	Et PAH
PAC	3	2524.6	1.77	PUF S1				141096	204	959	959	4619	C16H12	20980670	204
PAC	3	2524.6	1.82	PUF S2				823.94	210	645	794	3508	C16H12	93920	204
PAC	3	2524.6	1.85	PUF S2				136274	204	959	959	4757	C16H12	18687186	204
PAC	3	2528.4	1.9	PUF S2				2815.2	206	680	785	2615	C14H10N2	360871	206
PAC	3	2539.8	1.83	PUF S1				19923	206	929	942	8675	C16H14	5171650	206	Et PAH
PAC	3	2539.8	1.91	PUF S2				11596	206	927	939	8801	C16H14	2974647	206	Et PAH
PAC	3	2543.6	1.85	PUF S2				3009.9	218	838	840	2954	C17H14	263370	218
PAC	3	2555	1.65	PUF S1				58527	152	935	936	9603	C13H8O	17372626	180	PAH
PAC	3	2555	1.72	PUF S2				55267	152	926	928	9616	C13H8O	19332056	180	PAH
PAC	3	2555	1.9	PUF S2				7954.7	206	797	854	1227	C16H14	2500537	206	PAH
PAC	3	2558.8	1.84	PUF S1				12072	206	906	917	8929	C16H14	3060067	206	Me PAH
PAC	3	2566.4	1.62	PUF S1				5411	155	858	858	4423	C12H8O2	1172991	184
PAC	3	2566.4	1.7	PUF S2				4019.7	155	848	848	4246	C12H8O2	1015640	184
PAC	3	2566.4	1.82	PUF S1				7341.9	206	874	892	8326	C16H14	825271	206	Et PAH
PAC	3	2566.4	1.89	PUF S2				4118.7	206	840	851	4913	C16H14	450841	206	Et PAH
PAC	3	2566.4	1.96	PUF S1				39545	223	868	873	5125	C18H22	6193058	238
PAC	3	2566.4	2.04	PUF S2				16036	223	875	878	5937	C18H22	1883108	238
PAC	3	2570.2	1.88	PUF S2				2695	208	889	909	4127	C15H12O	756245	208
PAC	3	2577.8	1.69	PUF S1				45003	196	876	883	4960	C13H8O2	7761338	196	OH PAH
PAC	3	2577.8	1.7	GFF S1				1026.7	168	852	873	5720	C13H8O2	178424	196	OH PAH
PAC	3	2577.8	1.7	GFF S2				4472.4	196	874	880	6543	C13H8O2	621922	196	OH PAH
PAC	3	2577.8	1.74	PUF S1				9866.3	221	752	773	9538	C18H20	1201670	236
PAC	3	2577.8	1.74	GFF S2				1919.4	221	706	733	4755	C18H20	197877	236	PAH
PAC	3	2577.8	1.77	PUF S2				47134	196	880	887	4853	C13H8O2	7706342	196	OH PAH
PAC	3	2581.6	1.78	PUF S2				112.98	204	875	881	8384	C13H8O2	10735	196	OH PAH
PAC	3	2581.6	1.84	PUF S1				18412	206	874	891	8294	C16H14	4598287	206	Me PAH
PAC	3	2581.6	1.86	PUF S2				202.15	232	739	775	8179	C13H8O2	13930	196	OH PAH
PAC	3	2581.6	1.92	PUF S2				11804	206	882	910	8245	C16H14	3042899	206	Me PAH
PAC	3	2593	1.74	PUF S1				1736.9	218	809	892	3884	C17H14	264260	218
PAC	3	2596.8	1.63	PUF S1				2700.4	155	840	850	2492	C12H8O2	417695	184
PAC	3	2596.8	1.63	GFF S1				736.26	155	788	795	2087	C12H8O2	167483	184	possible
PAC	3	2596.8	1.63	GFF S2				1503	155	857	869	5550	C12H8O2	485526	184	possible
PAC	3	2596.8	1.7	PUF S2				2419.3	155	818	828	1272	C12H8O2	428027	184
PAC	3	2596.8	1.84	PUF S1				21938	206	918	933	8639	C16H14	5103651	206	Me PAH
PAC	3	2596.8	1.85	GFF S2				171.78	222	635	736	1880	C16H14	33444	206	Me PAH
PAC	3	2596.8	1.88	PUF S1				24646	220	829	829	6967	C17H16	3105895	220
PAC	3	2596.8	1.92	PUF S2				13378	206	920	930	8552	C16H14	2218847	206	Me PAH
PAC	3	2596.8	1.96	PUF S2				9485.1	220	822	822	5947	C17H16	1086956	220	Me/Et/iPr PAH
PAC	3	2604.4	1.62	PUF S1				7305.2	155	916	916	8539	C12H8O2	1582327	184
PAC	3	2604.4	1.62	GFF S1				505.03	184	803	815	4530	C12H8O2	61803	184	possible, slice of #10010?
PAC	3	2604.4	1.62	GFF S2				2088.5	184	922	922	8307	C12H8O2	308329	184	possible, slice of #10158?
PAC	3	2604.4	1.69	PUF S2				4886.2	155	931	931	8397	C12H8O2	1079969	184
PAC	3	2608.2	1.77	PUF S1				975.57	232	634	738	6258	C18H16	72662	232
PAC	3	2608.2	1.81	PUF S1				267.37	224	794	839	8143	C16H14	55101	206	Me PAH
PAC	3	2608.2	1.85	PUF S2				511.96	232	699	742	5732	C18H16	40031	232
PAC	3	2608.2	1.9	PUF S1				18425	221	755	759	9165	C18H20	2818435	236
PAC	3	2608.2	1.99	PUF S2				7593.9	221	715	717	8292	C18H20	1188739	236
PAC	3	2612	1.83	PUF S1				72172	206	948	953	9149	C16H14	11379076	206	Me PAH
PAC	3	2612	1.84	GFF S2				1928.9	206	727	805	8241	C16H14	229678	206	PAH diMe Phen/ Anthr
PAC	3	2612	1.9	PUF S2				10803	189	861	863	8363	C16H14	3924671	206
PAC	3	2615.8	1.89	PUF S1				5827.7	197	916	924	7517	C18H24O2	1036207	272
PAC	3	2615.8	1.89	GFF S2				1047.7	197	809	830	6367	C18H24O2	203867	272
PAC	3	2615.8	1.96	PUF S2				2184.6	197	904	910	8681	C18H24O2	453737	272
PAC	3	2615.8	2.01	GFF S2				9208.6	241	876	878	8914	C19H28	1114996	256
PAC	3	2619.6	1.82	PUF S1				8458.7	204	721	763	220	C16H12	699019	204
PAC	3	2631	1.8	GFF S2				685.29	202x0.053156	843	902	2889	C16H12	141240	204
PAC	3	2634.8	1.8	PUF S1				2102	204	695	853	2319	C16H12	371471	204
PAC	3	2634.8	1.83	PUF S1				9354.2	206	889	897	6069	C16H14	1154609	206	Me PAH
PAC	3	2634.8	1.9	PUF S2				4316.6	206	874	893	8018	C16H14	622176	206	Me PAH
PAC	3	2646.2	1.68	PUF S1				750.74	168	807	814	7809	C14H12O	194833	196
PAC	3	2646.2	1.89	PUF S2				7815.6	204	875	875	5680	C16H12	1188471	204
PAC	3	2650	1.82	PUF S1				7069.5	204	776	798	352	C16H12	1110289	204
PAC	3	2657.6	1.83	PUF S1				2157.5	239	702	792	8809	C16H14	160590	206	Me PAH
PAC	3	2657.6	1.87	PUF S2				7974	218	855	855	3943	C17H14	1466490	218
PAC	3	2657.6	1.89	PUF S2				3369.7	206	866	890	8753	C16H14	646115	206	Me PAH
PAC	3	2661.4	1.8	PUF S1				10273	218	878	878	3076	C17H14	1870604	218
PAC	3	2661.4	1.82	PUF S1				4409.2	206	825	872	8506	C16H14	842768	206	Me PAH
PAC	3	2661.4	1.87	PUF S1				1684	220	802	818	6413	C17H16	275867	220	propyl PAH
PAC	3	2665.2	1.7	PUF S1				2001.7	196	760	775	1063	C14H12O	265752	196
PAC	3	2669	1.67	PUF S1				557.67	140	724	773	8725	C13H8O2	138057	196	OH PAH
PAC	3	2669	1.77	PUF S1				752.66	181	803	819	5515	C15H12O	625099	208
PAC	3	2669	1.84	PUF S2				1155.7	181	802	862	4177	C15H12O	339420	208
PAC	3	2672.8	1.79	PUF S1				6248.2	218	846	869	1447	C17H14	911247	218
PAC	3	2680.4	1.8	PUF S1				4686.4	218	778	829	695	C17H14	453353	218
PAC	3	2688	1.7	PUF S1				1832.9	194	844	880	3073	C14H10O	564361	194
PAC	3	2688	1.76	PUF S2				1256	194	840	972	3177	C13H10N2	404925	194
PAC	3	2688	1.82	PUF S1				7251	206	876	883	5251	C16H14	946951	206	Et PAH
PAC	3	2688	1.9	PUF S2				6098.5	206	878	886	4847	C16H14	948721	206	Et PAH
PAC	3	2695.6	1.66	PUF S1				1836.1	168	820	850	8657	C13H8O2	279457	196	OH PAH
PAC	3	2695.6	1.66	GFF S2				581.94	168	659	804	8921	C13H8O2	106933	196	OH PAH
PAC	3	2695.6	1.73	PUF S2				1919.1	168	857	872	9305	C13H8O2	338534	196	OH PAH
PAC	3	2699.4	1.79	GFF S2				99576	202	955	957	9831	C16H10	12760653	202	PAH
PAC	3	2699.4	1.82	PUF S1				217103	202	891	903	5111	C16H10	86199103	202	PAH
PAC	3	2699.4	1.84	PUF S2				197052	202	882	889	9895	C16H10	44051256	202	PAH
PAC	3	2703.2	1.76	PUF S1				106.97	232	863	870	4803	C16H10	12199	202	PAH, part of #20583?
PAC	3	2703.2	1.89	PUF S2				2317.6	241	815	869	7320	C16H10	159191	202	PAH
PAC	3	2707	1.74	GFF S1				1009.2	222	736	810	9677	C15H10O2	79010	222	oxy PAH
PAC	3	2707	1.75	PUF S1				3746.9	222	708	795	9791	C15H10O2	353053	222	oxy PAH
PAC	3	2707	1.75	GFF S2				2245.1	222	745	802	9819	C15H10O2	180124	222	oxy PAH
PAC	3	2707	1.82	PUF S2				3917.5	222	733	798	9769	C15H10O2	360975	222	oxy PAH
PAC	3	2710.8	1.87	PUF S2				3707.6	218	816	851	5249	C17H14	369608	218	PAH
PAC	3	2718.4	1.96	PUF S2				2213.3	220	693	746	3091	C17H16	335087	220	tri Me PAH
PAC	3	2722.2	1.74	PUF S1				2887.8	210	791	821	2472	C14H10O2	694476	210
PAC	3	2733.6	1.66	PUF S1				632.2	140	714	793	8410	C13H8O2	102421	196	OH PAH
PAC	3	2733.6	1.73	PUF S2				250.75	168	631	751	8525	C13H8O2	27044	196	OH PAH
PAC	3	2733.6	1.87	PUF S1				25977	205	868	868	5055	C17H16	10241161	220	TriMe PAH
PAC	3	2733.6	1.94	PUF S2				11994	205	854	854	4642	C17H16	2211456	220	TriMe PAH
PAC	3	2748.8	1.6	PUF S1				143.71	233	667	796	9304	C12H11NO2S	7526.1	233
PAC	3	2752.6	1.81	GFF S1				4273.2	218	901	901	3927	C16H10O	357805	218
PAC	3	2752.6	1.82	PUF S1				113677	218	926	926	4557	C16H10O	11964957	218
PAC	3	2752.6	1.82	GFF S2				10684	218	901	901	3541	C16H10O	1075901	218
PAC	3	2752.6	1.89	PUF S2				113940	218	926	926	4568	C16H10O	12963985	218
PAC	3	2760.2	1.74	GFF S1				1349.5	203	923	923	3092	C15H9N	219303	203
PAC	3	2760.2	1.74	GFF S2				2623.3	203	914	914	2913	C15H9N	417403	203
PAC	3	2760.2	1.9	PUF S2				202.73	101	686	831	2527	C16H12	129195	204	PAH
PAC	3	2767.8	1.73	PUF S2				182.61	168	656	781	7968	C13H8O2	19408	196	OH PAH
PAC	3	2767.8	1.74	GFF S2				2654.6	222	826	911	9728	C15H10O2	464951	222	oxy PAH
PAC	3	2775.4	1.71	PUF S1				994.34	203	742	830	3268	C15H9N	149408	203
PAC	3	2783	1.78	PUF S1				10083	204	945	953	4046	C16H12	928024	204
PAC	3	2783	1.86	PUF S2				9537	204	953	961	3983	C16H12	1009566	204
PAC	3	2786.8	1.71	PUF S1				229.13	202	801	821	2140	C15H9N	16705	203
PAC	3	2786.8	1.8	PUF S2				2060	203x0.169978	825	832	2872	C15H9N	371643	203
PAC	3	2786.8	1.91	GFF S1				14678	219	852	857	5748	C18H18	1552556	234	Me/i-Prop PAH
PAC	3	2786.8	1.92	GFF S2				30385	219	865	865	6582	C18H18	3574830	234	Me/i-prop PAH
PAC	3	2786.8	1.99	PUF S1				83.033	264	912	912	8129	C18H18	10141	234
PAC	3	2794.4	1.65	PUF S1				1108.9	168	810	837	9323	C13H8O2	167749	196	OH PAH
PAC	3	2794.4	1.66	GFF S2				920.64	168	713	807	8568	C13H8O2	225632	196	OH PAH
PAC	3	2794.4	1.72	PUF S2				833.91	168	824	847	8723	C13H8O2	143292	196	OH PAH
PAC	3	2794.4	1.8	PUF S1				42009	218	922	922	4798	C16H10O	4635577	218
PAC	3	2794.4	1.83	PUF S1				970.89	232	671	787	5552	C18H16	213956	232
PAC	3	2794.4	1.87	PUF S2				45206	218	921	921	3635	C16H10O	5027908	218
PAC	3	2805.8	1.77	GFF S1				32187	202	789	885	9667	C16H10	4278954	202	PAH
PAC	3	2805.8	1.78	PUF S1				217244	202	937	943	9777	C16H10	66482059	202	PAH
PAC	3	2805.8	1.78	GFF S2				84394	202	904	919	9846	C16H10	14064036	202	PAH
PAC	3	2805.8	1.83	PUF S2				205067	202	876	884	4836	C16H10	59579439	202	PAH
PAC	3	2805.8	1.86	PUF S2				537.7	224	870	895	4908	C16H10	91495	202	PAH
PAC	3	2805.8	1.89	PUF S2				75.436	238	883	892	5733	C16H10	23900	202	PAH
PAC	3	2809.6	0.76	PUF S2				34.394	203	460	728	2377	C16H12	1929	204
PAC	3	2809.6	1.81	GFF S2				3262.9	218	944	944	4888	C16H10O	457667	218
PAC	3	2809.6	1.89	PUF S2				21102	218	891	891	5045	C16H10O	3263767	218
PAC	3	2809.6	1.97	PUF S2				281.86	234	604	747	9731	C16H10	29394	202	PAH
PAC	3	2809.6	2	PUF S2				545.01	210	678	789	9763	C16H10	58788	202	PAH
PAC	3	2809.6	2.02	PUF S2				35.644	130	812	839	9885	C16H10	6501.8	202	PAH
PAC	3	2809.6	2.24	PUF S2				20.579	217	644	753	9846	C16H10	908.73	202	PAH
PAC	3	2813.4	1.44	PUF S2				33.656	203	498	738	9413	C16H10	2532.8	202	PAH
PAC	3	2813.4	1.8	PUF S1				18957	218	932	932	4768	C16H10O	2760892	218
PAC	3	2821	1.86	PUF S2				590.07	243	864	891	6353	C18H12O	35234	244
PAC	3	2832.4	1.83	PUF S1				11463	215	933	933	4179	C17H12	1414921	216	Me PAH
PAC	3	2832.4	1.83	GFF S1				1689.4	216	807	889	2650	C17H12	171065	216	PAH
PAC	3	2832.4	1.9	PUF S2				12802	215	926	926	3267	C17H12	1698526	216	Me PAH
PAC	3	2836.2	1.71	PUF S1				1684.3	203	817	856	2998	C15H9N	148271	203
PAC	3	2836.2	1.78	PUF S2				1938.6	203	894	894	5278	C15H9N	231499	203
PAC	3	2840	1.83	PUF S1				14141	215	900	900	4155	C17H12	1302938	216	Me PAH
PAC	3	2840	1.9	PUF S2				14063	215	928	928	4529	C17H12	1313835	216	Me PAH
PAC	3	2855.2	1.91	PUF S1				2539.8	234	860	863	4582	C18H18	270507	234	TetraMe PAH
PAC	3	2859	1.8	PUF S1				10632	218	917	917	4282	C16H10O	1011171	218
PAC	3	2859	1.87	PUF S2				8205.7	218	923	923	4616	C16H10O	1027545	218
PAC	3	2862.8	1.7	PUF S1				1674.1	203	909	909	2925	C15H9N	173249	203
PAC	3	2862.8	1.77	PUF S2				1766.3	203	880	887	2736	C15H9N	234101	203
PAC	3	2874.2	1.86	PUF S1				3554.2	220	818	818	3047	C17H16	399375	220	TriMe PAH
PAC	3	2874.2	1.88	PUF S2				3436.7	215	724	805	4662	C18H14	466241	230	PAH
PAC	3	2874.2	1.93	PUF S2				3047.7	220	886	886	7718	C17H16	359245	220	TriMe/MeEt PAH
PAC	3	2881.8	1.77	PUF S1				881.84	236	691	731	9540	C16H12O2	114754	236
PAC	3	2885.6	1.96	PUF S1				6165.2	233	878	878	9311	C19H20	1026177	248
PAC	3	2885.6	2.04	PUF S2				1928.1	233	865	870	9228	C19H20	315345	248
PAC	3	2889.4	1.82	PUF S1				29155	216	930	930	4405	C17H12	4178834	216	Me PAH
PAC	3	2889.4	1.82	GFF S1				3581.5	216	858	912	2879	C17H12	715947	216	PAH/ Me-PAH
PAC	3	2889.4	1.89	PUF S2				30522	216	922	922	4034	C17H12	4406875	216	Me PAH
PAC	3	2893.2	1.77	PUF S1				1247.8	242	683	846	1596	C19H14	101333	242	PAH
PAC	3	2897	1.81	GFF S2				6388.2	216	889	894	2301	C17H12	1096356	216	Me PAH
PAC	3	2897	1.88	PUF S2				19269	216	909	909	2126	C17H12	3076170	216	Me PAH
PAC	3	2897	1.93	PUF S2				7066.2	232	838	904	8122	C17H12O	1139896	232	or C16H12N2
PAC	3	2900.8	1.8	PUF S1				19085	216	901	930	1668	C17H12	2897819	216	or MePAH
PAC	3	2904.6	1.73	GFF S1				1517.9	203	942	942	6295	C15H9N	244012	203
PAC	3	2904.6	1.73	GFF S2				2707.5	203	912	912	5034	C15H9N	325984	203
PAC	3	2908.4	1.91	PUF S2				2249.3	232	821	896	7693	C17H12O	165314	232	or C16H12N2
PAC	3	2919.8	1.8	GFF S1				1507.4	216	762	856	3085	C17H12	166734	216	part of ISTD+PAH
PAC	3	2919.8	1.81	PUF S1				15226	215	901	940	3519	C17H12	1734914	216	or MePAH
PAC	3	2919.8	1.81	GFF S2				4587.3	216	876	904	5460	C17H12	465708	216	PAH
PAC	3	2919.8	1.88	PUF S2				16657	215	880	890	4095	C17H12	1888769	216	or MePAH
PAC	3	2927.4	1.74	PUF S1				443.54	220	827	851	4430	C16H12O	56209	220
PAC	3	2927.4	1.78	PUF S1				1020.2	236	655	721	9756	C16H12O2	114436	236
PAC	3	2927.4	1.85	PUF S2				598.45	236	673	746	9782	C16H12O2	66483	236
PAC	3	2935	1.8	PUF S1				10764	215	894	894	2407	C17H12	2218977	216	Me PAH
PAC	3	2935	1.83	PUF S2				706.11	236	711	751	9674	C16H12O2	95327	236
PAC	3	2935	1.87	PUF S2				12295	215	905	957	2072	C17H12	2341039	216
PAC	3	2938.8	1.81	GFF S1				2723.2	216	896	933	3273	C17H12	378769	216	PAH/ ME-PAH
PAC	3	2938.8	1.82	GFF S2				8475.6	216	922	922	3355	C17H12	1276324	216	Me PAH
PAC	3	2965.4	1.73	PUF S1				855.63	242	738	771	8131	C19H14	58906	242	oxy PAH
PAC	3	2965.4	1.8	PUF S2				588.23	242	656	740	6883	C19H14	46465	242	oxy PAH
PAC	3	2973	1.74	PUF S1				8429	205	941	941	5372	C16H12O	1157484	220
PAC	3	2973	1.74	GFF S1				1932.3	205	881	881	4831	C16H12O	285802	220	Acetyl-PAH
PAC	3	2973	1.75	GFF S2				3198.1	205	910	910	6001	C16H12O	492091	220	Acetyl PAH
PAC	3	2973	1.81	PUF S2				1349.6	205	871	871	5111	C16H12O	210179	220
PAC	3	2980.6	1.81	PUF S2				379.65	221	617	698	221	C16H16O2	46885	240
PAC	3	2984.4	1.81	PUF S1				19851	216	941	941	5954	C17H12	1935214	216	Me PAH
PAC	3	2984.4	1.81	GFF S1				3603.4	216	876	876	3740	C17H12	257516	216	Me-PAH
PAC	3	2984.4	1.81	GFF S2				11161	216	934	934	4944	C17H12	1138021	216	Me PAH
PAC	3	2984.4	1.88	PUF S2				18171	216	948	948	5247	C17H12	1919565	216
PAC	3	2992	1.77	GFF S2				1081.3	228	679	837	8642	C18H12	126754	228
PAC	3	2995.8	1.75	PUF S1				987.62	221	700	726	9503	C16H12O2	146691	236
PAC	3	2995.8	1.81	PUF S1				14447	216	940	940	4020	C17H12	1639473	216	Me PAH
PAC	3	2995.8	1.81	GFF S1				2389.9	216	928	928	6888	C17H12	228424	216	Me-PAH
PAC	3	2995.8	1.82	PUF S2				1823.5	236	740	745	9603	C16H12O2	206714	236
PAC	3	2995.8	1.82	GFF S2				7530.7	216	941	941	4023	C17H12	1010972	216	Me PAH
PAC	3	2995.8	1.88	PUF S2				13791	216	943	943	4339	C17H12	1707628	216	Me PAH
PAC	3	2999.6	1.94	PUF S2				482.44	230	595	683	9091	C18H14	146149	230	PAH
PAC	3	3011	1.8	PUF S1				1383.5	242	703	854	1888	C19H14	98899	242
PAC	3	3011	1.87	PUF S2				1370.2	242	762	799	2857	C19H14	109933	242	or Me-PAH
PAC	3	3045.2	1.92	PUF S2				881.04	230	641	745	9077	C18H14	626749	230	PAH
PAC	3	3064.2	1.86	GFF S2				2081.4	230	712	792	8426	C18H14	489847	230	PAH
PAC	3	3068	1.91	PUF S2				2365.8	215	799	809	9195	C18H14	1098669	230	PAH
PAC	3	3068	1.93	PUF S2				477.48	231	602	750	4707	C18H14	81079	230	PAH
PAC	3	3071.8	1.84	PUF S1				2654.4	215	731	781	8457	C18H14	2692059	230	PAH
PAC	3	3071.8	1.85	GFF S2				1913.9	230	675	750	8989	C18H14	417518	230	PAH
PAC	3	3083.2	1.85	PUF S1				32.696	249	692	781	9331	C18H14	3875.1	230	PAH
PAC	3	3090.8	1.73	PUF S1				9465.3	220	811	819	8736	C14H8N2O	1043994	220
PAC	3	3090.8	1.74	GFF S2				17940	220	814	821	8705	C14H8N2O	2034388	220
PAC	3	3090.8	1.8	PUF S2				7540.9	220	800	809	8175	C14H8N2O	906515	220
PAC	3	3102.2	1.87	GFF S2				1225.6	230	660	753	7068	C18H14	312012	230	PAH
PAC	3	3102.2	1.93	PUF S2				250.63	215	687	787	7881	C18H14	95308	230	PAH
PAC	3	3117.4	1.98	PUF S1				4409.8	221	645	647	25	C16H15N	613345	221	should be 1H-Indene, 2,3-dihydro-1,1,3-trimethyl-3-phenyl-
PAC	3	3117.4	1.98	PUF S1				4409.8	221	803	803	9585	C18H20	613345	236
PAC	3	3117.4	1.99	GFF S1				541.44	221	664	722	9723	C18H20	79441	236
PAC	3	3117.4	2.06	PUF S2				1391.4	221	754	776	9805	C18H20	198197	236
PAC	3	3125	1.78	PUF S1				11019	230	874	895	9824	C17H10O	997426	230	oxy PAH
PAC	3	3125	1.78	GFF S1				7869.8	230	858	879	9818	C17H10O	669500	230	oxy PAH
PAC	3	3125	1.79	GFF S2				18130	230	877	886	9803	C17H10O	1694687	230	oxy PAH
PAC	3	3125	1.85	PUF S2				9321.4	230	858	878	9839	C17H10O	869046	230	oxy PAH
PAC	3	3128.8	1.86	PUF S1				431.8	232	698	786	6029	C18H16	57559	232
PAC	3	3132.6	1.72	PUF S1				405.18	254	805	833	1557	C20H14	37718	254
PAC	3	3132.6	1.79	PUF S2				321.9	254	871	915	2528	C20H14	29932	254
PAC	3	3132.6	1.81	PUF S1				1101	242	788	861	2726	C19H14	96255	242	PAH
PAC	3	3132.6	1.88	PUF S2				1269.9	242	751	807	3638	C19H14	103971	242	PAH
PAC	3	3147.8	1.78	GFF S1				15537	219	892	892	9617	C17H14O	1753249	234	Me/ Acetyl PAH
PAC	3	3147.8	1.79	GFF S2				16737	219	897	897	9624	C17H14O	1864788	234	Me/ Acetyl PAH
PAC	3	3155.4	1.81	PUF S1				11898	234	965	965	4158	C16H10S	1140110	234	Thiophene
PAC	3	3155.4	1.81	GFF S1				5512.7	234	923	932	5221	C16H10S	568873	234	Thiphene
PAC	3	3155.4	1.81	GFF S2				12451	234	957	957	3461	C16H10S	1530343	234	Thiophene
PAC	3	3155.4	1.87	PUF S2				3513.5	234	958	958	5633	C16H10S	384898	234	Thiophene
PAC	3	3159.2	1.73	PUF S1				370.55	203	639	874	3211	C16H12	54214	204	PAH
PAC	3	3159.2	1.79	PUF S2				296.8	203	592	718	1828	C22H24	56902	288
PAC	3	3159.2	1.86	GFF S2				1493.3	230	657	786	8484	C18H14	237676	230	no o/m/p Terphenyl match
PAC	3	3166.8	1.81	PUF S1				802.81	242	658	717	8286	C19H14	94285	242	oxy PAH
PAC	3	3166.8	1.87	PUF S2				993.61	242	773	818	2785	C19H14	112803	242
PAC	3	3174.4	1.77	GFF S1				3955.6	230	852	866	9877	C17H10O	275451	230	oxy PAH
PAC	3	3174.4	1.78	PUF S1				2827.2	202	882	898	9870	C17H10O	260158	230	oxy PAH
PAC	3	3174.4	1.78	GFF S2				10495	230	826	839	9841	C17H10O	1128027	230	oxy PAH
PAC	3	3174.4	1.84	PUF S2				2663.3	230	752	759	5087	C17H10O	202304	230
PAC	3	3178.2	1.78	PUF S1				881.13	230	750	770	9239	C18H12	360803	228	PAH
PAC	3	3178.2	1.79	GFF S1				5788.5	228	831	837	7610	C18H12	545087	228	PAH
PAC	3	3178.2	1.8	GFF S2				14325	228	727	764	9553	C18H12	1561247	228	PAH
PAC	3	3178.2	1.8	GFF S2				14325	228	769	769	9731	C18H12	1561247	228	PAH
PAC	3	3178.2	1.86	PUF S2				18989	228	745	764	9546	C18H12	2112652	228	PAH
PAC	3	3193.4	1.78	GFF S1				847	228	916	922	7874	C17H11N	77235	229
PAC	3	3193.4	1.79	GFF S2				1158.1	228	911	911	7604	C17H11N	132862	229
PAC	3	3201	1.8	PUF S1				2092.7	234	922	938	6831	C16H10S	200759	234	Thiophene
PAC	3	3208.6	1.77	GFF S1				10951	230	853	887	9805	C17H10O	1073878	230	oxy PAH
PAC	3	3208.6	1.79	PUF S1				8567.7	230	884	904	9819	C17H10O	836132	230	oxy PAH
PAC	3	3208.6	1.79	GFF S2				32100	230	861	887	9798	C17H10O	3731559	230	oxy PAH
PAC	3	3208.6	1.84	PUF S2				5797.7	230	857	880	9781	C17H10O	574491	230	oxy PAH
PAC	3	3223.8	1.87	PUF S1				2564.3	258	699	722	9792	C18H10O2	316740	258	oxy PAH
PAC	3	3223.8	1.92	PUF S2				3004.9	258	750	939	1637	C18H10O2	392472	258
PAC	3	3227.6	1.86	GFF S2				4512	258	608	692	9413	C18H10O2	543613	258	oxy PAH
PAC	3	3242.8	1.81	GFF S1				18554	228	902	944	9738	C18H12	1560128	228	PAH
PAC	3	3242.8	1.81	GFF S1				18554	228	964	964	6611	C18H12	1560128	228	PAH
PAC	3	3242.8	1.82	GFF S2				61756	228	935	960	9665	C18H12	6585254	228	PAH
PAC	3	3242.8	1.82	GFF S2				61756	228	969	969	9495	C18H12	6585254	228	PAH
PAC	3	3242.8	1.84	PUF S1				585.68	242	603	680	5823	C19H14	38306	242	Me PAH
PAC	3	3242.8	1.87	PUF S2				11843	228	915	943	9701	C18H12	1319079	228	PAH
PAC	3	3242.8	1.9	PUF S2				587.31	242	664	752	6010	C19H14	54279	242	Me PAH
PAC	3	3250.4	1.98	PUF S1				681.96	221	683	720	9558	C18H20	115797	236
PAC	3	3269.4	1.8	GFF S1				54922	228	946	946	5029	C18H12	6008199	228	PAH
PAC	3	3269.4	1.81	GFF S2				129632	228	934	934	4760	C18H12	19369219	228	part of BDE ISTD + PAH
PAC	3	3269.4	1.82	PUF S1				81738	228	922	952	9649	C18H12	9824232	228	high conc.
PAC	3	3269.4	1.87	PUF S2				77152	228	921	952	9694	C18H12	10042120	228	PAH
PAC	3	3273.2	2.08	PUF S2				50.355	256	612	777	5162	C18H12	3821.3	228	PAH
PAC	3	3280.8	1.8	PUF S1				1510.3	253	849	854	2030	C20H14	274010	254
PAC	3	3280.8	1.84	PUF S2				1161.2	253	888	906	2510	C20H14	204793	254
PAC	3	3284.6	1.76	GFF S2				3667.3	254	840	887	2034	C20H14	556416	254	PAH
PAC	3	3284.6	1.8	PUF S1				586.59	228	684	852	9153	C18H12	100310	228	PAH
PAC	3	3288.4	1.77	GFF S1				1675.1	229	835	869	6380	C17H11N	113387	229
PAC	3	3288.4	1.78	GFF S2				3149	229	678	727	6990	C18H12	333515	228
PAC	3	3292.2	1.84	PUF S2				337.93	228	680	845	9280	C18H12	25572	228	PAH
PAC	3	3296	1.79	GFF S1				850.69	254	838	876	1727	C20H14	68789	254	PAH
PAC	3	3296	1.8	GFF S2				2211.4	254	828	896	1759	C20H14	228349	254	PAH
PAC	3	3296	1.82	PUF S1				801.83	254	859	943	2437	C20H14	86861	254
PAC	3	3296	1.86	PUF S2				751.71	254	899	905	2526	C20H14	69897	254
PAC	3	3296	1.89	PUF S2				606.35	227	718	915	6964	C18H12	78212	228	PAH; MS partly #19545 and #19599
PAC	3	3299.8	1.9	PUF S2				522.88	242	605	697	650	C19H14	48246	242	PAH
PAC	3	3311.2	1.75	GFF S1				2019.4	217	898	920	5148	C16H11N	188393	217
PAC	3	3311.2	1.75	GFF S2				4747	217	951	957	5916	C16H11N	546702	217
PAC	3	3315	1.84	PUF S2				151.45	228	516	735	7730	C18H12	9965.7	228	PAH
PAC	3	3326.4	1.87	GFF S1				4161.6	242	675	726	8647	C19H14	395077	242	oxy PAH
PAC	3	3326.4	1.88	GFF S2				12303	242	747	772	339	C19H14	1374413	242	Me PAH
PAC	3	3326.4	1.9	PUF S1				2582.3	242	710	755	451	C19H14	274189	242	Me PAH
PAC	3	3334	1.82	PUF S1				407.7	203	671	815	1860	C16H12	73020	204	PAH
PAC	3	3334	1.85	PUF S2				413.64	203	655	802	1805	C16H12	78298	204	PAH
PAC	3	3337.8	1.87	GFF S2				7801.5	242	665	689	9155	C19H14	553414	242	Me PAH
PAC	3	3337.8	1.89	PUF S1				3420.9	242	717	727	430	C19H14	331187	242	Me PAH
PAC	3	3337.8	1.91	PUF S2				3997.6	242	858	858	8749	C18H10O	354662	242
PAC	3	3345.4	1.9	GFF S1				389.8	241	658	761	6054	C19H14	121481	242	Me PAH
PAC	3	3345.4	1.91	GFF S2				4755.7	242	748	784	1504	C19H14	530317	242	PAH Me
PAC	3	3345.4	3.24	GFF S2				938.46	276	796	936	5147	C22H12	259262	276	PAH
PAC	3	3360.6	1.94	GFF S2				449.21	256	689	797	779	C19H14	37008	242	PAH Me
PAC	3	3364.4	1.93	PUF S1				1096.5	242	690	698	229	C19H14	124122	242	Me PAH
PAC	3	3364.4	1.93	GFF S2				7711.5	242	816	878	900	C19H14	1390285	242	PAH Me
PAC	3	3364.4	1.94	PUF S2				816.18	242	718	718	224	C19H14	90613	242	Me PAH
PAC	3	3372	1.92	GFF S1				3186.2	242	816	862	7421	C19H14	845579	242	Me PAH
PAC	3	3372	1.95	PUF S1				2096.3	242	917	917	8759	C19H14	459321	242	Me PAH
PAC	3	3372	1.96	PUF S2				1509.7	242	815	827	8177	C19H14	290343	242	Me PAH
PAC	3	3375.8	1.93	GFF S2				9558.7	242	865	900	7985	C19H14	2059896	242	Me PAH
PAC	3	3375.8	1.96	PUF S1				2314	242	840	897	7826	C19H14	459321	242	Me PAH
PAC	3	3379.6	1.88	GFF S2				5692.9	256	808	815	3771	C19H12O	408072	256
PAC	3	3391	1.94	GFF S1				3863.1	242	810	861	7693	C19H14	356728	242	Me PAH
PAC	3	3391	1.94	GFF S2				12702	242	886	902	8134	C19H14	1229805	242	Me PAH
PAC	3	3391	1.97	PUF S1				2972.5	242	907	913	8300	C19H14	261582	242	Me PAH
PAC	3	3391	1.97	PUF S2				1472.3	242	754	804	8359	C19H14	130281	242	oxy PAH
PAC	3	3402.4	1.96	GFF S2				1954.4	242	700	729	1795	C20H16	275717	256	PAH Me
PAC	3	3413.8	1.96	GFF S1				2182.4	242	808	899	917	C19H14	213725	242	Me PAH
PAC	3	3413.8	1.97	GFF S2				6342.3	242	845	863	7456	C19H14	1106010	242	Me PAH
PAC	3	3413.8	2	PUF S1				669.42	242	743	839	7672	C19H14	106830	242	Me PAH
PAC	3	3413.8	2	PUF S2				379.81	242	706	813	6098	C19H14	24830	242	Me PAH
PAC	3	3417.6	1.94	GFF S2				3234.3	252	858	858	3750	C20H14	522501	254	Me PAH
PAC	3	3417.6	1.97	PUF S1				2109.2	254	959	959	6898	C20H14	244236	254
PAC	3	3417.6	1.97	PUF S2				1251.5	254	925	932	6012	C20H14	135680	254	Me PAH
PAC	3	3421.4	1.93	GFF S1				1250.1	252	932	932	5674	C20H14	160170	254	PAH
PAC	3	3432.8	1.99	GFF S2				11746	242	824	830	5600	C19H14	1799975	242	Me PAH
PAC	3	3432.8	2.01	PUF S2				1407.3	242	832	859	8169	C19H14	175579	242	Me PAH
PAC	3	3432.8	2.03	PUF S1				2602.1	242	894	908	8091	C19H14	329434	242	Me PAH
PAC	3	3436.6	1.99	GFF S1				3958	242	825	844	8029	C19H14	514739	242	Me PAH
PAC	3	3444.2	1.83	GFF S1				1791	217	918	934	3667	C16H11N	247025	217
PAC	3	3444.2	1.83	GFF S2				3246.7	217	924	936	3660	C16H11N	549921	217
PAC	3	3444.2	2.02	PUF S2				1883	240	921	921	9411	C19H12	255708	240
PAC	3	3444.2	2.04	PUF S1				1981.1	240	935	935	9468	C19H12	285318	240
PAC	3	3448	1.96	GFF S1				2633.6	254	772	872	5112	C20H14	194748	254	PAH
PAC	3	3448	1.96	GFF S2				186.71	283	946	946	6796	C20H14	33340	254	PAH
PAC	3	3448	1.98	PUF S2				361.21	254	829	919	5922	C20H14	31883	254
PAC	3	3448	2	PUF S1				973.7	254	754	843	2368	C20H14	91760	254
PAC	3	3448	2	GFF S1				2920.4	240	911	911	9341	C19H12	336710	240	PAH
PAC	3	3448	2	GFF S2				9096.7	240	933	933	9428	C19H12	1291101	240	PAH
PAC	3	3459.4	2	GFF S1				2366	240	904	904	9151	C19H12	252764	240	PAH
PAC	3	3459.4	2.01	GFF S2				10102	240	902	902	9004	C19H12	1191058	240	PAH
PAC	3	3459.4	2.02	PUF S2				1290.4	240	924	924	9321	C19H12	141246	240
PAC	3	3459.4	2.05	PUF S1				1602.6	240	893	893	9024	C19H12	175259	240
PAC	3	3467	1.99	GFF S1				5609.1	254	956	956	6518	C20H14	489066	254	PAH
PAC	3	3467	2	GFF S2				14304	254	958	958	6328	C20H14	1552300	254	PAH
PAC	3	3467	2.02	PUF S2				1365.4	254	945	945	5814	C20H14	131683	254
PAC	3	3467	2.04	PUF S1				2322.9	254	951	951	6224	C20H14	275530	254
PAC	3	3467	2.1	GFF S2				934.48	241	835	864	1580	C20H16	811431	256	DiME PAH
PAC	3	3470.8	1.97	GFF S1				1326.8	244	804	826	3408	C19H16	90863	244	PAH
PAC	3	3470.8	1.98	GFF S2				3072	244	802	824	3560	C19H16	276582	244	PAH
PAC	3	3478.4	1.92	GFF S1				446.37	230	657	751	8019	C17H10O	49759	230	oxy PAH
PAC	3	3482.2	1.99	GFF S1				1373	244	835	858	7694	C19H16	243268	244	PAH
PAC	3	3482.2	1.99	GFF S2				3049.2	244	862	875	7246	C19H16	380777	244	PAH
PAC	3	3493.6	2.12	GFF S2				1341.5	241	869	899	3561	C20H16	242738	256	DiMe PAH
PAC	3	3501.2	1.94	GFF S1				1818.5	202	875	896	9379	C17H10O	212293	230	oxy PAH
PAC	3	3501.2	1.95	GFF S2				1376.9	230	860	902	9488	C17H10O	139670	230	oxy PAH
PAC	3	3505	3.33	GFF S2				252.14	279	734	792	9840	C22H14	61015	278	PAH
PAC	3	3524	3.39	GFF S2				3823.9	276	873	941	5615	C22H12	1081172	276	PAH
PAC	3	3550.6	3.41	GFF S2				228.16	276	624	870	8340	C22H12	64526	276	PAH
PAC	3	3554.4	2.22	GFF S2				3028.8	256	853	853	1694	C20H16	1158856	256	DiME PAH
PAC	3	3558.2	2.06	GFF S1				1490.3	258	834	860	9653	C18H10O2	152237	258	oxy PAH
PAC	3	3558.2	2.06	GFF S2				2862.7	258	771	821	9532	C18H10O2	440953	258	oxy PAH
PAC	3	3558.2	2.21	GFF S1				770.9	256	852	852	1535	C20H16	135505	256	DiMe PAH
PAC	3	3558.2	3.42	GFF S2				365.4	276	543	867	6459	C22H12	47852	276
PAC	3	3565.8	2.09	GFF S1				748.17	244	831	848	3909	C19H16	77893	244	PAH
PAC	3	3600	2.19	GFF S1				753.35	278	601	729	8227	C22H14	46060	278
PAC	3	3603.8	2.19	GFF S1				1131.2	254	692	826	9877	C19H10O	179737	254	oxy PAH
PAC	3	3603.8	2.19	GFF S2				3154.7	254	717	785	9877	C19H10O	434975	254	oxy PAH
PAC	3	3603.8	2.27	GFF S1				2027.7	256	904	904	1976	C20H16	205366	256	DiMe PAH
PAC	3	3603.8	2.28	GFF S2				3785	256	894	894	3091	C20H16	426186	256	DiMe PAH
PAC	3	3611.4	2.29	GFF S1				966.05	268	814	844	5899	C20H12O	105293	268
PAC	3	3611.4	2.29	GFF S2				2565.9	268	881	881	4515	C20H12O	505142	268	PAH with OH or furan
PAC	3	3611.4	3.49	GFF S2				10700	276	886	943	7275	C22H12	3217985	276	or Benzo[ghi]perylene
PAC	3	3638	3.47	GFF S2				851.72	278	755	833	9761	C22H14	306510	278	PAH
PAC	3	3645.6	2.29	GFF S1				58478	252	933	938	5720	C20H12	7346026	252	P&B if Benzo(b)fluranthene of Benzo(a)pyrene
PAC	3	3645.6	2.29	PUF S2				2390.7	252	879	894	6776	C20H12	419109	252	P&B if Benzo(b)fluranthene of Benzo(a)pyrene
PAC	3	3645.6	2.3	GFF S2				113331	252	947	951	6962	C20H12	21248550	252	P&B Benzo[b]fluoranthene or Benzo[a]pyrene
PAC	3	3645.6	2.35	PUF S1				6101.6	252	894	905	7597	C20H12	1096634	252	P&B if Benzo(b)fluranthene of Benzo(a)pyrene
PAC	3	3653.2	2.33	GFF S1				2404.2	268	929	929	7810	C20H12O	313391	268
PAC	3	3653.2	2.34	GFF S2				6237.9	268	923	923	7180	C20H12O	1001947	268	PAH with OH or furan
PAC	3	3657	2.23	GFF S1				3086.8	254	874	901	9897	C19H10O	347518	254	oxy PAH
PAC	3	3657	2.24	GFF S2				5127.8	254	880	906	9896	C19H10O	790267	254	oxy PAH
PAC	3	3657	2.3	GFF S1				19271	252	934	937	6179	C20H12	2471411	252	P&B Benzo[b]fluoranthene or Benzo[a]pyrene
PAC	3	3657	2.3	PUF S2				262.79	252	624	791	2448	C20H12	20300	252	P&B if Benzo(b)fluranthene of Benzo(a)pyrene
PAC	3	3657	2.31	GFF S2				42860	252	940	942	6670	C20H12	6467457	252	P&B Benzo[b]fluoranthene or Benzo[a]pyrene
PAC	3	3657	2.37	PUF S1				1004.2	252	841	882	6410	C20H12	169934	252	P&B Benzo[b]fluoranthene or Benzo[a]pyrene
PAC	3	3668.4	2.29	GFF S1				23632	252	883	884	6283	C20H12	3470761	252	P&B if Benzo(b)fluranthene of Benzo(a)pyrene
PAC	3	3668.4	2.29	PUF S2				559.98	252	849	888	5559	C20H12	82168	252	P&B L2-3 PAH
PAC	3	3668.4	2.31	GFF S2				54754	252	943	944	6285	C20H12	11397586	252	P&B Benzo[b]fluoranthene or Benzo[a]pyrene
PAC	3	3668.4	2.35	PUF S1				1725.3	252	918	924	5821	C20H12	302586	252	P&B if Benzo(b)fluranthene of Benzo(a)pyrene
PAC	3	3679.8	2.37	GFF S1				1165.6	268	915	915	5294	C20H12O	111039	268	PAH with OH or furan
PAC	3	3679.8	2.38	GFF S2				2953.7	268	922	922	5360	C20H12O	452878	268	PAH with OH or furan
PAC	3	3691.2	2.35	PUF S1				95.772	254	571	818	9634	C19H10O	12809	254	oxy PAH
PAC	3	3695	2.27	GFF S1				3864.7	254	865	886	9897	C19H10O	468205	254	oxy PAH
PAC	3	3695	2.27	GFF S2				6649.1	254	874	895	9897	C19H10O	1062483	254	oxy PAH
PAC	3	3702.6	2.35	GFF S1				2248.3	252	841	867	5502	C20H12	309689	252	P&B if Benzo(b)fluranthene of Benzo(a)pyrene
PAC	3	3702.6	2.36	GFF S2				10386	252	892	904	5560	C20H12	1843767	252	P&B Benzo[b]fluoranthene or Benzo[a]pyrene
PAC	3	3714	2.34	GFF S1				434.16	252	630	842	5763	C20H12	77774	252	P&B if Benzo(b)fluranthene of Benzo(a)pyrene
PAC	3	3714	2.35	GFF S2				767.36	250	805	918	3969	C20H12	146025	252	P&B Benzo[b]fluoranthene or Benzo[a]pyrene
PAC	3	3714	2.39	GFF S1				2792	268	931	931	7282	C20H12O	461616	268
PAC	3	3714	2.4	PUF S2				207.89	268	837	842	6102	C20H12O	24187	268
PAC	3	3714	2.4	GFF S2				7231.7	268	893	899	4597	C20H12O	1448301	268	PAH with OH or furan
PAC	3	3714	2.46	PUF S1				341.83	268	854	854	6427	C20H12O	50054	268
PAC	3	3714	2.51	GFF S1				470.31	270	812	818	1831	C21H18	52268	270	TriMe PAH
PAC	3	3729.2	2.43	GFF S2				816.47	268	876	876	5102	C20H12O	143003	268	PAH with OH or furan
PAC	3	3740.6	2.43	GFF S1				1310.5	268	892	892	5207	C20H12O	192605	268
PAC	3	3740.6	2.44	GFF S2				3148.2	268	853	859	5725	C20H12O	678226	268	PAH with OH or furan
PAC	3	3744.4	3.56	GFF S2				388.59	278	648	825	9820	C22H14	91840	278	PAH
PAC	3	3752	2.41	GFF S1				783.74	278	686	761	9643	C22H14	79234	278	PAH
PAC	3	3752	2.41	GFF S2				1712.9	278	777	825	6372	C22H14	186066	278	PAH
PAC	3	3752	2.48	PUF S1				105.03	278	487	736	8241	C22H14	8675.2	278	PAH
PAC	3	3763.4	2.46	GFF S1				1348.8	268	875	875	3654	C20H12O	310812	268
PAC	3	3763.4	2.46	GFF S2				3185.6	268	901	901	5147	C20H12O	852334	268
PAC	3	3767.2	2.54	GFF S1				577.55	266	819	841	3343	C21H14	123063	266	PAH
PAC	3	3767.2	2.55	GFF S2				1163.5	266	858	866	2967	C21H14	334071	266	PAH
PAC	3	3793.8	2.56	GFF S1				1670.3	266	879	879	2827	C21H14	451409	266	PAH
PAC	3	3793.8	2.57	GFF S2				3790.5	266	904	904	3295	C21H14	1227729	266	PAH
PAC	3	3797.6	2.46	PUF S2				281.63	264	632	825	8530	C20D12	41890	264	PAH; NO D12 perylene in sample!!
PAC	3	3805.2	3.6	GFF S2				378.71	276	789	846	9803	C22H14	135704	278	PAH
PAC	3	3812.8	2.47	GFF S1				30313	252	946	948	6170	C20H12	5709298	252	P&B if Benzo(b)fluranthene of Benzo(a)pyrene
PAC	3	3812.8	2.47	PUF S2				328.28	252	775	875	6104	C20H12	50332	252	P&B if Benzo(b)fluranthene of Benzo(a)pyrene
PAC	3	3812.8	2.48	GFF S2				63396	252	937	939	6304	C20H12	15496024	252	P&B if Benzo(b)fluranthene of Benzo(a)pyrene
PAC	3	3812.8	2.54	PUF S1				1557.8	252	907	916	5566	C20H12	284986	252	P&B if Benzo(b)fluranthene of Benzo(a)pyrene
PAC	3	3812.8	2.58	GFF S2				1456.7	266	896	896	4646	C21H14	286943	266	PAH
PAC	3	3816.6	0.15	GFF S2				14.058	273	444	721	2673	C20H12	771.41	252	P&B if Benzo(b)fluranthene of Benzo(a)pyrene
PAC	3	3820.4	2.6	GFF S2				2209.2	266	885	885	2952	C21H14	665552	266	PAH
PAC	3	3824.2	2.61	GFF S1				1072.2	266	892	892	3582	C21H14	335404	266	Me PAH
PAC	3	3835.6	2.5	GFF S1				8956.4	252	898	925	6080	C20H12	1606086	252
PAC	3	3835.6	2.51	GFF S2				33504	252	919	939	5226	C20H12	7224113	252	P&B Benzo[b]fluoranthene or Benzo[a]pyrene
PAC	3	3835.6	2.76	GFF S2				26.52	215	640	710	2468	C20H12	2654.8	252	P&B if Benzo(b)fluranthene of Benzo(a)pyrene
PAC	3	3835.6	2.78	GFF S2				44.406	284	638	755	1760	C20H12	3489.7	252	P&B if Benzo(b)fluranthene of Benzo(a)pyrene
PAC	3	3850.8	2.45	GFF S2				565.48	254	620	758	9854	C19H10O	86060	254	oxy PAH
PAC	3	3854.6	2.59	GFF S1				1435.9	278	735	810	9809	C22H14	165294	278
PAC	3	3854.6	2.59	GFF S2				3055.2	278	705	791	9753	C22H14	401822	278
PAC	3	3869.8	2.66	GFF S1				957.95	266	908	908	3955	C21H14	176080	266	PAH
PAC	3	3869.8	2.66	GFF S2				1856.6	266	892	892	2961	C21H14	440693	266	PAH
PAC	3	3885	2.65	GFF S1				659.96	266	902	902	3657	C21H14	124937	266	PAH
PAC	3	3904	2.56	GFF S1				2165.7	252	836	855	4970	C20H12	312635	252
PAC	3	3904	2.57	GFF S2				7029.9	252	867	879	5501	C20H12	1432217	252	P&B Benzo[b]fluoranthene or Benzo[a]pyrene
PAC	3	3919.2	3.78	GFF S2				8524	276	895	944	4591	C22H12	3554699	276	PAH
PAC	3	3923	2.67	GFF S2				78.184	131	883	883	3896	C21H14	240532	266	PAH
PAC	3	3930.6	2.67	GFF S1				1080.6	278	792	792	9867	C22H14	111613	278
PAC	3	3930.6	2.67	GFF S2				364.18	274	778	836	9779	C22H14	31806	278	PAH
PAC	3	3930.6	2.67	GFF S2				2290.5	278	844	846	9855	C22H14	269303	278	PAH
Phth	3	1650.6	1.73	GFF S1				50.715	194	621	845	6116	C10H10O4	13457	194	Phth
Phth	3	1852	1.76	PUF S2				26.768	183	789	810	522	C26H38O4	2134.8	414	Phth
Phth	3	1852	1.96	GFF S1				68.643	181	695	796	1097	C13H16O4	9973.6	236	Phth
Phth	3	2110.4	1.69	GFF S2				2747.8	149	856	856	7848	C14H14O4	1133825	246	Phth
Phth	3	2125.6	1.74	GFF S2				1566.1	149	907	907	1248	C17H24O4	494100	292	Phth
Phth	3	2163.6	1.78	PUF S1				1770.4	149	679	845	841	C19H27ClO4	416008	354	Phth
Phth	3	2209.2	1.94	PUF S1				136.48	248	601	810	2036	C20H21BrO4	10175	404	Phth
Phth	3	2209.2	1.95	PUF S2				5772.2	179	678	852	507	C20H28O4	1329026	332	Phth
Phth	3	2209.2	2.02	PUF S2				54.943	248	804	866	523	C15H19ClO4	4619.2	298	Phth
Phth	3	2209.2	2.2	PUF S2				199.7	299	735	836	514	C18H26O4	12005	306	Phth
Phth	3	2209.2	2.27	PUF S2				185.11	231	517	838	348	C15H19ClO4	18624	298	Phth
Phth	3	2209.2	2.29	PUF S2				143.82	270	635	842	568	C16H20O4	19862	276	Phth
Phth	3	2209.2	2.33	PUF S2				54.627	284	515	816	320	C19H28O4	3882	320	Phth
Phth	3	2213	1.28	PUF S2				16.645	122	528	798	743	C17H24O4	2428.6	292	Phth
Phth	3	2213	2.05	PUF S1				735.49	226	921	921	848	C26H42O4	88289	418	Phth
Phth	3	2220.6	0.86	GFF S1				61.85	149	486	818	578	C22H34O4	9671.8	362	Phth
Phth	3	2228.2	0.85	GFF S1				26.264	149	337	744	3161	C17H24O4	3527.1	292	Phth
Phth	3	2292.8	1.81	PUF S1				96705	149	898	931	1272	C16H22O4	37620654	278	Phth
Phth	3	2372.6	1.91	PUF S2				53.103	256	843	882	953	C22H34O4	3255.8	362	Phth
Phth	3	2376.4	1.79	PUF S1				14079	150	889	889	1088	C20H30O4	17042128	334	Phth
Phth	3	2452.4	1.83	GFF S1				1527.8	163	845	853	1056	C23H36O4	609901	376	Phth
Phth	3	2452.4	1.84	GFF S2				1071.2	163	820	826	931	C18H26O4	538781	306	Phth
Phth	3	2627.2	1.93	GFF S1				383.98	149	696	860	926	C17H24O4	140398	292	Phth
Phth	3	2684.2	1.77	GFF S2				901.17	149	677	846	500	C13H16O4	232279	236	Phth
Phth	3	2836.2	1.87	GFF S1				276.3	254	616	816	458	C27H40O4	22640	428	Phth
Phth	3	3022.4	3.45	PUF S2				27.659	280	480	688	1288	C24H38O4	1413.5	390	Phth
Phth	3	3026.2	1.99	GFF S2				102.38	137	631	776	367	C30H50O4	53858	474	Phth
Phth	3	3037.6	3.33	GFF S1				35.965	662	580	734	809	C21H32O4	903.14	348	Phth
Phth	3	3071.8	0.28	GFF S1				45.982	149	340	651	536	C16H13BrO4	8547.3	348	Phth
Phth	3	3094.6	1.92	GFF S1				84.381	260	520	757	1689	C21H23BrO4	7819.5	418	Phth
Phth	3	3106	2.15	PUF S2				149.97	167	635	795	486	C25H40O4	242658	404	Phth
Phth	3	3128.8	2.01	PUF S1				1638	149	813	851	2030	C24H38O4	1624394	390	Phth
Phth	3	3140.2	1.86	GFF S1				184.04	149	532	723	372	C22H25ClO4	62174	388	Phth
Phth	3	3140.2	2.09	PUF S1				86.318	293	645	715	1825	C25H40O4	6057.2	404	Phth
Phth	3	3151.6	2.01	PUF S1				3071.7	149	842	842	1473	C24H38O4	3469809	390	Phth
Phth	3	3151.6	2.08	PUF S2				121.48	279	684	773	970	C28H46O4	29017	446	Phth
Phth	3	3163	2.07	GFF S1				112.04	293	651	766	753	C23H36O4	15938	376	Phth
Phth	3	3193.4	2.08	GFF S1				1089.6	149	768	813	806	C24H38O4	2257286	390	Phth
Phth	3	3201	2.01	PUF S1				49.1	279	753	856	1026	C26H42O4	2799.5	418	Phth
Phth	3	3216.2	1.91	GFF S1				1900.2	149	847	886	808	C30H46O4	783926	470	Phth
Phth	3	3216.2	1.98	PUF S2				1082.9	149	743	782	800	C29H44O4	353566	456	Phth
Phth	3	3235.2	2.06	GFF S1				1376.7	149	759	779	8031	C26H42O4	641072	418	Phth
Phth	3	3242.8	2.08	PUF S1				4117.7	149	819	839	830	C24H38O4	30697133	390	Phth
Phth	3	3242.8	2.14	PUF S2				6863.6	149	803	813	876	C25H40O4	33718195	404	Phth
Phth	3	3246.6	2	PUF S1				27.394	261	792	860	411	C23H36O4	1805.6	376	Phth
Phth	3	3288.4	1.97	GFF S1				314.22	147	808	872	767	C22H34O4	113848	362	Phth
Phth	3	3288.4	2.06	GFF S1				167.91	293	639	729	2630	C25H38O4	42860	402	Phth
Phth	3	3288.4	2.09	GFF S1				3752.5	167	856	856	860	C29H48O4	973284	460	Phth
Phth	3	3288.4	2.1	GFF S2				1703.6	167	845	855	727	C26H42O4	326327	418	Phth
Phth	3	3299.8	2.14	PUF S2				3427.2	149	816	845	895	C23H36O4	3454614	376	Phth
Phth	3	3303.6	3.05	PUF S1				23.798	149	768	986	480	C18H26O4	4393.1	306	Phth
Phth	3	3322.6	2.17	PUF S2				1590.4	149	640	763	519	C17H22O4	569632	290	Phth
Phth	3	3330.2	2.16	PUF S2				6171.5	149	827	851	908	C24H38O4	3638312	390	Phth
Phth	3	3341.6	2.15	PUF S1				3738.3	149	831	852	846	C24H38O4	3544818	390	Phth
Phth	3	3341.6	2.18	PUF S2				5603.3	149	829	850	719	C24H38O4	3730964	390	Phth
Phth	3	3368.2	2.25	PUF S1				752.54	149	831	860	9046	C28H46O4	5317923	446	Phth
Phth	3	3391	2.26	PUF S1				27.853	127	567	715	449	C24H38O4	9869.9	390	Phth
Phth	3	3394.8	2.22	PUF S1				130.47	293	829	847	676	C24H38O4	18099	390	Phth
Phth	3	3398.6	2.07	GFF S1				2501.7	149	869	897	928	C22H34O4	752712	362	Phth
Phth	3	3410	2.32	PUF S2				548.34	149	773	842	8720	C28H46O4	4393510	446	Phth
Phth	3	3588.6	2.67	GFF S1				95.169	149	533	752	685	C23H36O4	56687	376	Phth
Phth	3	3759.6	3.05	GFF S1				2005.5	149	876	895	1271	C29H48O4	1062705	460	Phth
Phth	3	3759.6	3.05	PUF S2				180.13	149	546	812	300	C25H38O4	94702	402	Phth
Phth	3	3759.6	3.05	GFF S2				863.99	149	815	875	6945	C30H50O4	520740	474	Phth
Phth	3	3904	3.43	PUF S2				91.27	149	546	814	252	C21H31ClO4	54601	382	Phth
Phth	3	3904	3.44	GFF S2				256.14	149	662	870	782	C24H27NO4	102534	393	Phth
Level 4 compounds
	4	902	1.79	GFF S1				161.73	69	949	949	7298	C10H16O	323991	152
	4	902	1.8	GFF S2				87.576	69	914	914	6752	C10H16O	229965	152
	4	902	1.82	GFF S1				356.38	109	844	844	5655	C10H16O	423630	152
	4	902	1.82	PUF S2				230.15	109	841	841	3821	C10H16O	203180	152
	4	905.8	1.8	PUF S2				51.409	69	834	834	3036	C10H16O	52745	152	or C9H12O2
	4	921	1.76	GFF S2				77.809	135	745	810	4702	C11H18	79741	150	pos. Mol. Formula
	4	924.8	1.75	PUF S2				77.227	135	818	818	3647	C10H14O	45862	150	or C11H18
	4	940	1.82	GFF S2				170.09	152	836	844	2029	C10H16O	86660	152	pos. Mol. Formula
	4	951.4	1.69	GFF S2				237.01	96	867	880	3386	C9H14O	159806	138	pos. Mol. Formula
	4	970.4	1.8	PUF S2				240.78	67	846	846	2106	C10H16O	372242	152	or C11H20
	4	970.4	1.8	GFF S2				171.44	81	834	847	1652	C10H16O	355330	152	pos. Mol. Formula
	4	985.6	1.79	PUF S2				55.461	82	815	815	3612	C10H16O	63143	152
	4	1004.6	1.66	GFF S2				465.8	119	814	874	2591	C9H10O	340748	134	pos. Mol. Formula
	4	1080.6	1.81	GFF S1				78.06	152	886	886	7769	C10H16O	24109	152
	4	1080.6	1.81	GFF S2				61.366	152	930	930	8926	C10H16O	23613	152
	4	1099.6	1.77	PUF S1				46.436	87	361	437	1191	C7H14O2	17824	130	pos mol formula
	4	1168	1.78	PUF S2				102.02	68	867	867	3626	C10H14O	58751	150
	4	1168	1.8	PUF S1				101.98	68	875	875	4166	C10H14O	58363	150
	4	1198.4	2	PUF S1				310.87	79	806	835	1575	C10H16O	357495	152
	4	1202.2	1.97	PUF S2				197.8	79	807	838	1917	C10H16O	302115	152
	4	1475.8	1.51	PUF S1				997.37	121	860	892	7599	C7H7NO	406976	121	pos mol formula
	4	1574.6	1.65	PUF S2				130.85	180	813	825	9866	C10H12O3	14864	180
	4	1620.2	1.61	PUF S2				2887	146	878	878	9365	C9H6O2	549045	146	or C10H10O
	4	1700	1.73	GFF S2				137.07	119	709	856	2025	C9H10O	50934	134	pos. Mol. Formula
	4	1722.8	1.71	PUF S2				3358.8	163	808	808	4928	C11H14O2	1189954	178	or C12H18O
	4	1760.8	1.65	PUF S2				4194.7	119	898	905	3983	C9H8O2	1930627	148	or C10H12O
	4	1776	1.73	GFF S1				795.04	111	853	893	7320	C11H16O2	667932	180
	4	1852	1.65	PUF S2				5734.6	168	841	859	7823	C9H12O3	749507	168	or C9H12OS
	4	1859.6	1.82	PUF S1				1080.9	180	807	851	4849	C14H12	132214	180	or C14H12N2
	4	1882.4	1.66	PUF S1				896.4	162	865	865	3732	C11H14O	394806	162	or C10H10O2
	4	1882.4	1.71	PUF S2				616.01	162	858	868	3920	C11H14O	273261	162	or C10H10O2
UNKNOWN halogenated	4	1882.4	1.95	PUF S2				495.45	256	531	531	3574		80243		3xCl, some sim to trichlorophenoxy acetic acid (NIST hit), but diff. Fragments. Me/ OMe groups; M(x)~254
UNKNOWN halogenated	4	1886.2	1.89	PUF S1				1864.2	256	583	684	3538		145631		3xCl, some sim to trichlorophenoxy acetic acid (NIST hit), but diff. Fragments. Me/ OMe groups; M(x)~254
	4	1890	1.64	PUF S1				1351.8	133	814	832	1642	C10H10O2	344672	162	or C12H18
	4	1890	1.7	PUF S2				1020	133	830	834	2440	C10H10O2	367432	162	or C12H18
	4	1905.2	1.7	PUF S2				3681.3	103	848	872	2372	C9H8O	1828282	132	pos mol formula
	4	1912.8	1.66	PUF S1				3727	133	854	876	2535	C10H10O2	1310436	162
	4	1912.8	1.71	PUF S2				2669.6	133	897	897	2815	C10H10O2	978019	162
	4	1950.8	1.99	PUF S1				193.9	212	582	596	3526	C15H24O2	21473	236	maybe part of #5712 L2 P&B
UNKNOWN halogenated	4	1954.6	1.75	PUF S1				17308	220	574	680	363		1361065		2xCl, some sim to Hit N-(4,6-Dichloro-1,3,5-triazin-2-yl)-N-isobutylamine or dichlorophenoxy acetic acid (P&B comp.), but there diff. Fragments. Me/ OMe groups; M(x)~220; since ist elutes later than #5479 it might be sth which was falling appart during GC or the C7H10Cl2N4 Hit might fit; BR-CL anisole doesn´t match eighter, halogen cluster is not right for Br-Cl, matches 2xCl
UNKNOWN halogenated	4	1954.6	1.81	PUF S2				7616.2	220	596	682	1115		632725		2xCl, some sim to Hit N-(4,6-Dichloro-1,3,5-triazin-2-yl)-N-isobutylamine or dichlorophenoxy acetic acid (P&B comp.), but there diff. Fragments. Me/ OMe groups; M(x)~220; since ist elutes later than #4877 it might be sth which was falling appart during GC or the C7H10Cl2N4 Hit might fit; BR-CL anisole doesn´t match eighter, halogen cluster is not right for Br-Cl, matches 2xCl
	4	1969.8	1.79	PUF S2				2136.2	186	822	824	5973	C12H10O2	367912	186	or C11H10N2O
	4	1973.6	1.73	PUF S1				2890.6	186	870	885	7490	C12H10O2	527172	186	or C11H10N2O
	4	1977.4	1.66	PUF S2		Change to:		674.92	166	836	868	1487	C11H12O4	73959	208	or C12H16O3
UNKNOWN halogenated	4	2007.8	1.85	PUF S1		2xCl,1xEt-group M(x)~248		12889	219	600	600	1628		1784905		might coelute with # 7112 and ident. From #7112 is wrong due to wrong spectra separation?!
UNKNOWN halogenated	4	2007.8	1.92	PUF S2		2xCl,1xEt-group M(x)~248		3826.6	219	585	585	1621		570194		might coelute with # 7112 and ident. From #7112 is wrong due to wrong spectra separation?!
	4	2019.2	1.84	PUF S1				8064.3	180	894	894	307	C14H12N2	1400576	208	or C14H12
	4	2019.2	1.91	PUF S2				5714	180	751	815	2813	C14H12	736842	180	or C14H12
	4	2026.8	1.84	PUF S1				9888.4	180	891	891	677	C14H12N2	1790222	208	or C14H12
	4	2026.8	1.9	PUF S2				7521.8	180	937	948	2603	C14H12	1499301	180	or C14H12
	4	2045.8	1.61	PUF S1				2626.1	132	713	740	1464	C10H10O2	552745	162	pos mol formula
	4	2045.8	1.83	PUF S1				14068	180	955	966	3231	C14H12	2129744	180	or C14H12N2
	4	2045.8	1.9	PUF S2				9592.2	180	950	962	2647	C14H12	1617699	180	or C14H12N2
UNKNOWN halogenated	4	2053.4	1.97	PUF S1				12920	255	585	678	1841		1200269		3xCl with Et group M(x)~282
UNKNOWN halogenated	4	2053.4	2.04	PUF S2				4566	255	584	662	2014		458587		3xCl with Et group M(x)~282
	4	2087.6	1.67	GFF S2				850.27	168	894	902	9245	C12H8O	169626	168
	4	2133.2	1.62	GFF S1				233.9	157	802	868	5600	C12H16O8	41481	288	looks like a sugar related compound											0
	4	2133.2	1.62	GFF S2				866.49	157	907	934	6846	C12H16O8	146191	288	looks like a sugar related compound											0
UNKNOWN halogenated	4	2140.8	1.79	PUF S1				13830	248	542	706	478		1209239		2xCl, might be a chlorinated PAH like NIST match 9H-Fluoren-9-one, 3,6-dichloro-
UNKNOWN halogenated	4	2140.8	1.86	PUF S2		Change to:		5836.4	248	546	720	426		498040		2xCl, might be a chlorinated PAH like NIST match 9H-Fluoren-9-one, 3,6-dichloro-
UNKNOWN halogenated	4	2201.6	2.04	PUF S2		related to 2205//2.05; min 2xCl, M(x)~276, bad spectra, high fragmented no clear cluster		1232	205	599	635	2128		1902526		part of #8460; min 2xCl, M(x)~276, bad spectra, high fragmented no clear cluster
UNKNOWN halogenated	4	2205.4	2.05	PUF S2		related to 2202//2.04; min 2xCl, M(x)~276, bad spectra, high fragmented no clear cluster		331.28	243x2.536458	525	532	3205		27038		related/ part of #8411; min 2xCl, M(x)~276, bad spectra, high fragmented no clear cluster
	4	2220.6	1.87	PUF S1				12575	179	855	886	3141	C15H14	3961040	194	or C15H15N3
	4	2262.4	1.86	PUF S1				5470.1	194	842	853	4801	C15H14	1897129	194	or C15H15N3
	4	2285.2	1.85	PUF S1				2461.9	194	827	852	2487	C15H14	435922	194	or C15H15N3
	4	2296.6	1.71	PUF S1				4356.5	181	817	901	3960	C14H12O	818806	196
	4	2296.6	1.77	PUF S1				37610	194	892	917	2365	C14H10O	6040891	194	or C14H10O
	4	2296.6	1.77	PUF S1				37610	194	924	944	4236	C13H10N2	6040891	194	or C14H10O
	4	2296.6	1.84	PUF S2				24958	194	926	950	4186	C13H10N2	4475315	194	or C14H10O
UNKNOWN halogenated	4	2334.6	2.07	PUF S2		Change to		1601.3	219	622	666	1302		1724318		min 2xCl; M(x)~290, fragmentation doesn´t match 4xPCB, but very fragmented spectra and no clear Cl clusters
UNKNOWN halogenated	4	2342.2	2.09	PUF S2		min 2xCl; M(x)~290 maybe ~310, related to 2335//2.07, but less intense spectra; Additional cluster at 273-281; fragmentation doesn´t match 4xPCB, but very fragmented spectra and no clear Cl clusters		332.84	277	667	674	5032		31574		min 2xCl; M(x)~290 maybe ~310, related to #10322, but less intense spectra; Additional cluster at 273-281; fragmentation doesn´t match 4xPCB, but very fragmented spectra and no clear Cl clusters
	4	2357.4	1.75	PUF S1				656.94	196	839	951	3001	C13H10N2	176805	194	or C14H10O
	4	2368.8	1	PUF S1				41.39	120	589	662	1188	C9H12	4641.8	120	pos mol formula
	4	2403	1.56	GFF S1				2459.6	167	923	974	8579	C11H14O4	464914	210
	4	2403	1.57	GFF S2				5933.6	167	942	976	8801	C11H14O4	1455807	210
	4	2444.8	1.67	PUF S1				2755.1	182	764	808	3226	C12H10N2	500151	182	or C13H10O
	4	2444.8	1.67	PUF S1				2755.1	182	801	801	4115	C13H10O	500151	182	or C12H10N2
	4	2456.2	1.89	PUF S2				2516.2	208	853	877	3522	C15H12O	724781	208	or C16H16
UNKNOWN halogenated	4	2463.8	2.03	PUF S1				1221.8	241	619	627	7413		319013		min 4xCl M(x)~376
	4	2471.4	1.82	PUF S1				5111.1	208	818	908	4695	C14H12N2	1000240	208	or C15H12O or C16H16
UNKNOWN halogenated	4	2482.8	1.66	GFF S1				3281	173	922	936	1351		707638		2xCl Phenyl + side chain with 1-2xCl m(x)~256 NO PCB
UNKNOWN halogenated	4	2482.8	1.67	GFF S2				2225.1	173	865	908	890		536444		2xCl Phenyl + side chain with 1-2xCl m(x)~256 NO PCB
	4	2528.4	1.82	PUF S1				2897.2	206	697	778	4274	C15H10O	404490	206	or C14H10N2
	4	2562.6	1.72	PUF S1				741.97	194	833	861	5433	C13H10N2	126033	194	or C14H10O
	4	2562.6	1.79	PUF S2				683.56	194	878	893	7279	C13H10N2	123376	194	or C14H10O
	4	2566.4	1.96	GFF S2				3942.2	223	871	878	7842	C18H22	428126	238
	4	2589.2	1.71	PUF S1				1986.5	194	879	879	3712	C14H10O	423366	194	or C13H10N2
	4	2589.2	1.79	PUF S2				1794.3	194	860	860	3066	C14H10O	346169	194	or C13H10N2
	4	2589.2	1.99	PUF S1				9484.7	237	666	673	1308	C17H16O2	1139704	252	or C16H16N2O
	4	2589.2	2.03	GFF S2				719.55	157x0.716206	819	846	7465	C19H28	390696	256
	4	2688	1.7	GFF S2				1267	194	824	879	4690	C14H10O	484263	194
	4	2783	1.69	PUF S1				1439.2	194	868	875	3495	C14H10O	249414	194	or C14H10O
	4	2783	1.69	PUF S1				1439.2	194	887	892	2975	C13H10N2	282445	194	or C14H10O
	4	2783	1.76	PUF S2				593.43	194	790	832	2636	C14H10O	94500	194	or C14H10O PAH
	4	2840	1.94	PUF S2				3503.2	232	820	888	7289	C17H12O	485711	232	or C16H12N2
	4	2847.6	1.9	PUF S1				6213.1	205	834	865	7845	C18H18	960206	234	or C17H14O
	4	2847.6	1.97	PUF S2				1757.4	205	809	847	7340	C18H18	293445	234	or C17H14O
	4	2855.2	1.89	PUF S1				4471.8	241	803	803	6409	C19H28	357764	256	or C18H24O
	4	2897	1.85	PUF S1				7526.5	232	812	899	7663	C17H12O	1101928	232	or C16H12N2
	4	2919.8	1.77	PUF S1				1721.8	218	767	784	4117	C15H10N2	291682	218	or C16H10O
	4	2938.8	1.79	PUF S2				282.72	155	833	890	8941	C17H12O	51659	232	or C16H12N2
	4	2999.6	1.77	PUF S1				5628.8	244	824	888	4632	C18H12O	400877	244	or C19H16
	4	3026.2	1.81	PUF S1				4982.9	244	901	901	4999	C18H12O	413418	244	or C19H16 or C17H12N2
	4	3026.2	1.88	PUF S2				5805.2	244	902	914	4301	C18H12O	516147	244	or C19H16 or C17H12N2
	4	3049	1.82	PUF S1				3673.8	244	870	870	5358	C18H12O	284582	244	or C19H16 or C17H12N2
	4	3049	1.9	PUF S2				4448.4	244	919	919	5079	C18H12O	356358	244	or C19H16 or C17H12N2
	4	3147.8	1.78	PUF S1				5929.5	219	902	902	9327	C17H14O	714650	234	or C18H18
	4	3204.8	1.83	PUF S1				299.97	215	800	870	5413	C18H12O	50864	244	or C19H16
UNKNOWN	4	3801.4	2.08	GFF S1				309.29	160	910	910	8397	C18H12N2O4	68463	320	something with phthalimide
UNKNOWN	4	3801.4	2.08	GFF S2				237.15	160	922	922	7648	C18H12N2O4	59772	320	something with phthalimide

## Sheet: logP method evaluation
Analyte	Molecular formula	SMILES created with Jchem	AOPWIN half-life [days]	logkoa	logKow	logKaw (=ow-oa)	Average Rec [%]	VP (mmHG 25C)	VP exp at X C	.	BP est	BP exp	logP	logD (pH=7)
Chlorobenzilate	C16H14Cl2O3	CCOC(=O)C(O)(C1=CC=C(Cl)C=C1)C1=CC=C(Cl)C=C1	2.1	10.269	4.74	-5.529	no recovery	1.15e-07	2.2e-06	(VP exp at 20 deg C)	403.32	----	4.26834	4.26829
Dichlorvos	C4H7Cl2O4P	COP(=O)(OC)OC=C(Cl)Cl	1.137	6.06	1.43	-4.63	no recovery	0.0248	0.0158	(VP exp at 25 deg C)	251.76	----	1.37278	1.37278
Etridiazole	C5H5Cl3N2OS	CCOC1=NC(=NS1)C(Cl)(Cl)Cl	1.556	6.281	3.37	-2.911	no recovery	0.653	0.011	(VP exp at 25 deg C)	284.78	188	3.24241	3.24241
Endrin aldehyde	C12H8Cl6O	ClC12C3C4CC(C=O)C5C4C(Cl)(C13Cl)C(Cl)(Cl)C25Cl	0.344	7.887	4.12	-3.767	no recovery	1.7e-05	2e-07	(VP exp at 25 deg C)	339.62	----	3.64223	3.64223
Chlorfenvinphos	C12H14Cl3O4P	CCOP(=O)(OCC)O\C(=C/Cl)C1=CC=C(Cl)C=C1Cl	0.185	9.738	3.81	-5.928	no recovery	9.41e-06	7.5e-06	(VP exp at 25 deg C)	397.78	----	4.29736	4.29736
Bromacil	C9H13BrN2O2	CCC(C)N1C(=O)NC(C)=C(Br)C1=O	0.551	10.388	2.11	-8.278	13.9697	1.1e-07	3.07e-07	(VP exp at 25 deg C)	421.19	----	1.69186	1.69137
Chloroneb	C8H8Cl2O2	COC1=CC(Cl)=C(OC)C=C1Cl	1.952	5.82	3.44	-2.38	18.746	0.000844	0.003	(VP exp at 25 deg C)	252.91	268	2.86599	2.86599
Pirimiphos-methyl	C11H20N3O3PS	CCN(CC)C1=NC(C)=CC(OP(=S)(OC)OC)=N1	0.067	8.81	4.2	-4.61	25.6966	3.76e-05	1.5e-05	(VP exp at 20 deg C)	372.87	----	2.96437	2.95912
Galaxolide	C18H26O	CC1C(C)(C)C2=C(C=C3C(C)COCC3=C2)C1(C)C	0.283	8.263	5.9	-2.363	27.2254	0.000512	0.000545	(VP exp at 25 deg C)	325.3	325	4.72272	4.72272
Tecnazene (TCNB) 2,3,5,6-Tetrachloronitrobenzene	HC6Cl4NO2	[O-][N+](=O)C1=C(Cl)C(Cl)=CC(Cl)=C1Cl	1488.2	7.962	4.38	-3.582	28.8319	0.000172	0.0018	(VP exp at 15 deg C)	314.28	----	4.32941	4.32941
Tonalide	C18H26O	CC1CC(C)(C)C2=CC(C(C)=O)=C(C)C=C2C1(C)C	0.605	7.949	5.7	-2.249	29.0451	0.000189	0.000512	(VP exp at 0 deg C)	331.88	----	4.95772	4.95772
Propachlor	C11H14ClNO	CC(C)N(C(=O)CCl)C1=CC=CC=C1	0.51	7.012	2.18	-4.832	31.8182	0.000185	0.00023	(VP exp at 25 deg C)	322.84	----	2.38575	2.38575
Pentachloronitrobenzene (Quintozene)	C6Cl5NO2	[O-][N+](=O)C1=C(Cl)C(Cl)=C(Cl)C(Cl)=C1Cl	1479.04	7.383	4.64	-2.743	41.3699	2.72e-05	5e-05	(VP exp at 20 deg C)	335.3	328	4.93345	4.93345
Octachlorostyrene	C8Cl8	ClC(Cl)=C(Cl)C1=C(Cl)C(Cl)=C(Cl)C(Cl)=C1Cl	9.967	9.487	7.46	-2.027	43.3361	1.32e-05	----	(VP exp at --- deg C)	352.62	----	6.63856	6.63856
Musk Xylol (Musk Xylene)	C12H15N3O6	CC1=C(C(=C(C(C)=C1[N+]([O-])=O)[N+]([O-])=O)C(C)(C)C)[N+]([O-])=O	12.871	10.033	4.9	-5.133	44.0133	6.35e-07	2.25e-07	(VP exp at 25 deg C)	411.56	----	4.3651	4.3651
Atrazine	C8H14ClN5	CCNC1=NC(Cl)=NC(NC(C)C)=N1	0.391	9.583	2.61	-6.973	49.6342	2.86e-05	2.89e-07	(VP exp at 25 deg C)	313.03	----	2.1976	2.19692
Diazinon	C12H21N2O3PS	CCOP(=S)(OCC)OC1=CC(C)=NC(=N1)C(C)C	0.111	9.145	3.81	-5.335	49.9255	5.43e-05	9e-05	(VP exp at 25 deg C)	366.2	----	4.19206	4.19139
Trifluralin	C13H16F3N3O4	CCCN(CCC)C1=C(C=C(C=C1[N+]([O-])=O)C(F)(F)F)[N+]([O-])=O	0.446	7.716	5.34	-2.376	51.1437	1.35e-05	4.58e-05	(VP exp at 25 deg C)	382.17	----	4.59777	4.59777
Simazine	C7H12ClN5	CCNC1=NC(NCC)=NC(Cl)=N1	0.6	9.594	2.18	-7.414	55.8331	9.18e-06	2.21e-08	(VP exp at 25 deg C)	307.45	----	1.78103	1.78029
Chlorpyrifos-methyl	C7H7Cl3NO3PS	COP(=S)(OC)OC1=NC(Cl)=C(Cl)C=C1Cl	0.182	8.32	4.31	-4.01	59.2222	6.74e-05	2.25e-05	(VP exp at 25 deg C)	354.22	----	4.0707	4.0707
2,3,5,6-tetrabromo-p-xylene (TBX)	C8H6Br4	CC1=C(Br)C(Br)=C(C)C(Br)=C1Br	22.512	8.821	6.65	-2.171	64.2412	4.14e-05	----	(VP exp at --- deg C)	331.92	----	6.0751	6.0751
Chlorthal-dimethyl (Dacthal or DCPA)	C10H6Cl4O4	COC(=O)C1=C(Cl)C(Cl)=C(C(=O)OC)C(Cl)=C1Cl	24.251	8.33	4.28	-4.05	77.8532	2.73e-06	2.5e-06	(VP exp at 25 deg C)	343.19	365	4.39638	4.39638
Metribuzin	C8H14N4OS	CSC1=NN=C(C(=O)N1N)C(C)(C)C	0.586	10.02	1.7	-8.32	79.4511	5.17e-06	4.35e-07	(VP exp at 20 deg C)	366.8	----	1.96112	1.9611
Musk ketone	C14H18N2O5	CC(=O)C1=C(C)C(=C(C(=C1C)[N+]([O-])=O)C(C)(C)C)[N+]([O-])=O	8.274	9.902	4.3	-5.602	83.18	5.84e-07	3e-07	(VP exp at 25 deg C)	401.75	----	3.98276	3.98276
Cyanazine	C9H13ClN6	CCNC1=NC(Cl)=NC(NC(C)(C)C#N)=N1	1.149	12.199	2.22	-9.979	85.6178	1.52e-06	1.38e-07	(VP exp at 25 deg C)	369.47	----	1.96168	1.96168
Chlorpyrifos (Dursban)	C9H11Cl3NO3PS	CCOP(=S)(OCC)OC1=NC(Cl)=C(Cl)C=C1Cl	0.117	8.882	4.96	-3.922	87.6788	2.05e-05	2.02e-05	(VP exp at 25 deg C)	377.43	----	4.78432	4.78432
Alachlor	C14H20ClNO2	CCC1=CC=CC(CC)=C1N(COC)C(=O)CCl	0.237	9.988	3.52	-6.468	89.9017	2.05e-05	----	(VP exp at --- deg C)	378.17	----	3.59147	3.59147
Fenitrothion	C9H12NO5PS	COP(=S)(OC)OC1=CC=C(C(C)=C1)[N+]([O-])=O	0.179	7.72	3.3	-4.42	98.2069	7.64e-05	5.4e-05	(VP exp at 20 deg C)	359.98	----	3.11501	3.11501
Phosalone	C12H15ClNO4PS2	CCOP(=S)(OCC)SCN1C(=O)OC2=CC(Cl)=CC=C12	0.045	9.173	4.38	-4.793	103.3	1.16e-07	----	(VP exp at --- deg C)	466.82	----	3.74546	3.74546
p,p'-Methoxychlor	C16H15Cl3O2	COC1=CC=C(C=C1)C(C1=CC=C(OC)C=C1)C(Cl)(Cl)Cl	0.2	10.161	5.08	-5.081	103.3	4.17e-05	----	(VP exp at --- deg C)	377.87	346	4.93407	4.93407
Dieldrin	C12H8Cl6O	ClC1=C(Cl)C2(Cl)C3C4CC(C5OC45)C3C1(Cl)C2(Cl)Cl	1.163	8.588	5.2	-3.388	103.366	2.74e-06	3e-06	(VP exp at 20 deg C)	340.17	330	3.94718	3.94718
Heptachlor epoxide (Isomer B) exo, cis	C10H5Cl7O	ClC1C2OC2C2C1C1(Cl)C(Cl)=C(Cl)C2(Cl)C1(Cl)Cl	2.067	8.046	4.98	-3.066	104.206	8.99e-06	1.95e-05	(VP exp at 30 deg C)	340.81	----	4.04376	4.04376
Malathion	C10H19O6PS2	CCOC(=O)CC(SP(=S)(OC)OC)C(=O)OCC	0.138	9.059	2.36	-6.699	107.848	0.000124	3.38e-06	(VP exp at 25 deg C)	351.17	----	1.85728	1.85728
a-Chlordane cis	C10H6Cl8	ClC1CC2C(C1Cl)C1(Cl)C(Cl)=C(Cl)C2(Cl)C1(Cl)Cl	2.123	8.922	6.22	-2.702	108.264	2e-05	9.98e-06	(VP exp at 25 deg C)	351.09	----	5.26999	5.26999
b-Chlordane trans	C10H6Cl8	ClC1CC2C(C1Cl)C1(Cl)C(Cl)=C(Cl)C2(Cl)C1(Cl)Cl	2.123	8.922	6.22	-2.702	108.786	2e-05	9.98e-06	(VP exp at 25 deg C)	351.09	----	5.26999	5.26999
1,2,3,5,8-Pentachloronaphthalene (PCN 53)	C10H3Cl5	ClC1=CC=C(Cl)C2=C(Cl)C(Cl)=C(Cl)C=C12	25.901	9.12	6.8	-2.32	109.669	1.49e-05	1e-06	(VP exp at 25 deg C)	350.87	----	5.98295	5.98295
p,p'-DDT	C14H9Cl5	ClC1=CC=C(C=C1)C(C1=CC=C(Cl)C=C1)C(Cl)(Cl)Cl	3.114	10.378	6.91	-3.468	109.811	0.00241	1.6e-07	(VP exp at 20 deg C)	367.95	260	6.4575	6.4575
1,2,3,4,5,6,7,8-Octachloronaphthalene (PCN 75)	C10Cl8	ClC1=C(Cl)C2=C(Cl)C(Cl)=C(Cl)C(Cl)=C2C(Cl)=C1Cl	278.258	10.025	8.5	-1.525	120.065	8.59e-08	1.1e-08	(VP exp at 25 deg C)	406.95	----	7.79508	7.79508
Metolachlor	C15H22ClNO2	CCC1=CC=CC(C)=C1N(C(C)COC)C(=O)CCl	0.191	9.334	2.9	-6.434	126.939	0.00505	3.14e-05	(VP exp at 25 deg C)	382.78	282	3.45338	3.45338
Carbophenothion	C11H16ClO2PS3	CCOP(=S)(OCC)SCSC1=CC=C(Cl)C=C1	0.044	10.386	5.33	-5.056	129.269	4.69e-06	3e-07	(VP exp at 20 deg C)	400.67	----	4.89155	4.89155
Endrin	C12H8Cl6O	ClC1=C(Cl)C2(Cl)C3C4CC(C5OC45)C3C1(Cl)C2(Cl)Cl	1.163	8.588	5.2	-3.388	131.11	2.74e-06	3e-06	(VP exp at 20 deg C)	340.17	330	3.94718	3.94718
1,2,3,5,6,7-Hexachloronapthalene (PCN 67)	C10H2Cl6	ClC1=CC2=C(Cl)C(Cl)=C(Cl)C=C2C(Cl)=C1Cl	57.151	9.488	7.04	-2.448	135.238	3.33e-06	3.5e-07	(VP exp at 25 deg C)	369.56	----	6.58699	6.58699
Endrin ketone	C12H8Cl6O	ClC1C2(Cl)C3C4CC5C3C(Cl)(C2(Cl)Cl)C1(Cl)C5C4=O	0.928	10.383	4.3	-6.083	138.87	5.51e-06	----	(VP exp at --- deg C)	356.59	----	4.32027	4.32027
Chlorothalonil	C8Cl4N2	ClC1=C(Cl)C(C#N)=C(Cl)C(C#N)=C1Cl	1731.09	7.891	2.9	-4.991	46	4.45e-07	5.7e-07	(VP exp at 25 deg C)	354.86	350	4.10162	4.10162
1,2,3,4,5,6,7-Heptachloronaphthalene (PCN 73)	C10HCl7	ClC1=CC2=C(Cl)C(Cl)=C(Cl)C(Cl)=C2C(Cl)=C1Cl	126.106	10.779	8.2	-2.579	154.682	9.12e-07	8.5e-08	(VP exp at 25 deg C)	388.26	----	7.19104	7.19104
trans-Permethrin	C21H20Cl2O3	CC1(C)[C@H](C=C(Cl)Cl)[C@H]1C(=O)OCC1=CC=CC(OC2=CC=CC=C2)=C1	0.467	10.508	6.5	-4.008	156.606	9.94e-07	5.18e-08	(VP exp at 25 deg C)	437.64	----	5.6961	5.6961
Methidathion	C6H11N2O4PS3	COC1=NN(CSP(=S)(OC)OC)C(=O)S1	0.071	8.733	2.2	-6.533	199.78	2.16e-06	3.37e-06	(VP exp at 25 deg C)	418.78	----	2.29274	2.29274
Ethion	C9H22O4P2S4	CCOP(=S)(OCC)SCSP(=S)(OCC)OCC	0.019	9.88	5.07	-4.81	260.893	3.54e-06	1.5e-06	(VP exp at 25 deg C)	415.18	----	3.92923	3.92923
PBDE-28	C12H7Br3O	BrC1=CC=C(OC2=C(Br)C=C(Br)C=C2)C=C1	7.57	9.396	5.88	-3.516	48.1	2.34e-06	6.7e-07	(VP exp at 25 deg C)	374.81	----	5.77979	5.77979
PBDE-99	C12H5Br5O	BrC1=CC=C(OC2=CC(Br)=C(Br)C=C2Br)C(Br)=C1	19.439	9.195	6.84	-2.355	58.9	1.08e-06	3.1e-08	(VP exp at 25 deg C)	436.21	----	7.3173	7.3173
PBDE-47	C12H6Br4O	BrC1=CC=C(OC2=CC=C(Br)C=C2Br)C(Br)=C1	10.661	10.686	6.77	-3.916	62.4333	2.41e-07	7e-08	(VP exp at 25 deg C)	405.51	----	6.54854	6.54854
PBDE-153	C12H4Br6O	BrC1=CC(Br)=C(OC2=CC(Br)=C(Br)C=C2Br)C=C1Br	46.163	13.265	8.55	-4.715	84.7	2.87e-09	----	(VP exp at --- deg C)	466.91	----	8.08605	8.08605
PBDE-197	C12H2Br8O	BrC1=CC(Br)=C(OC2=C(Br)C=C(Br)C(Br)=C2Br)C(Br)=C1Br	91.01	15.845	10.33	-5.515	91.6	3.68e-11	----	(VP exp at --- deg C)	528.31	----	9.62355	9.62355
PBDE-183	C12H3Br7O	BrC1=CC(Br)=C(OC2=CC(Br)=C(Br)C=C2Br)C(Br)=C1Br	64.327	14.554	9.44	-5.114	92.0333	3.29e-10	----	(VP exp at --- deg C)	497.61	----	8.8548	8.8548
DBDPE	C14H4Br10	BrC1=C(Br)C(Br)=C(CCC2=C(Br)C(Br)=C(Br)C(Br)=C2Br)C(Br)=C1Br	4.466	19.221	13.64	-5.581	4	1.9e-13	----	(VP exp at --- deg C)	600.86	----	12.1971	12.1971
EHTBB	C15H18Br4O2	CCCCC(CC)COC(=O)C1=CC(Br)=C(Br)C(Br)=C1Br	0.979	12.335	8.75	-3.585	44.6662	3.43e-08	----	(VP exp at --- deg C)	432.91	----	8.07431	8.07431
g/d TBECH	C8C12Br4	BrCC(Br)C1CCC(Br)C(Br)C1	2.2	8.009	5.24	-2.769	57.2826	0.000105	----	(VP exp at --- deg C)	336.82	----	4.6641	4.6641
PBBZ	C6HBr5	BrC1=CC(Br)=C(Br)C(Br)=C1Br	267.683	9.095	6.44	-2.655	58.2293	9.34e-06	----	(VP exp at --- deg C)	339.86	----	5.81701	5.81701
BTBPE	C14H8Br6O2	BrC1=CC(Br)=C(OCCOC2=C(Br)C=C(Br)C=C2Br)C(Br)=C1	0.72	15.424	8.9	-6.524	59.6912	1.89e-10	----	(VP exp at --- deg C)	502.17	----	8.07214	8.07214
a/b TBECH	C8C12Br4	BrCC(Br)C1CCC(Br)C(Br)C1	2.2	8.009	5.24	-2.769	61.8418	0.000105	----	(VP exp at --- deg C)	336.82	----	4.6641	4.6641
TBP-AE (ATE)	C9H7Br3O	BrC1=CC(Br)=C(OCC=C)C(Br)=C1	0.33	8.555	5.59	-2.965	62.347	0.000101	----	(VP exp at --- deg C)	323.15	----	4.85308	4.85308
BEHTBP	C24H34Br4O4	CCCCC(CC)COC(=O)C1=C(Br)C(Br)=C(Br)C(Br)=C1C(=O)OCC(CC)CCCC	0.49	16.864	11.95	-4.914	69.9517	1.71e-11	----	(VP exp at --- deg C)	539.75	----	11.1004	11.1004
DPTE	C9H7Br5O	BrCC(Br)COC1=C(Br)C=C(Br)C=C1Br	2.65	11.055	6.34	-4.715	73.9551	6.22e-07	----	(VP exp at --- deg C)	393.71	----	5.88157	5.88157
BATE	C9H6Br4O	BrC(=C)COC1=C(Br)C=C(Br)C=C1Br	0.549	9.647	5.98	-3.667	74.3715	7.35e-06	----	(VP exp at --- deg C)	359.05	----	5.25455	5.25455
PBEB	C8H5Br5	CCC1=C(Br)C(Br)=C(Br)C(Br)=C1Br	9.301	9.97	7.48	-2.49	81.3313	4.65e-06	----	(VP exp at --- deg C)	363.21	----	6.775	6.775
PBT	C7H3Br5	CC1=C(Br)C(Br)=C(Br)C(Br)=C1Br	57.822	8.042	5.43	-2.612	81.9967	1.46e-07	----	(VP exp at --- deg C)	351.6	----	6.33043	6.33043
HBB	C6Br6	BrC1=C(Br)C(Br)=C(Br)C(Br)=C1Br	933.944	9.126	6.07	-3.056	82.1239	1.68e-08	----	(VP exp at --- deg C)	370.7	----	6.58576	6.58576
Dieldrin	C12H8Cl6O	ClC1=C(Cl)C2(Cl)C3C4CC(C5OC45)C3C1(Cl)C2(Cl)Cl	1.163	8.588	5.2	-3.388	111.73	2.74e-06	3e-06	(VP exp at 20 deg C)	340.17	330	3.94718	3.94718
Aldrin	C12H8Cl6	ClC1=C(Cl)C2(Cl)C3C4CC(C=C4)C3C1(Cl)C2(Cl)Cl	0.166	9.245	6.5	-2.745	63.3034	1.87e-06	0.00012	(VP exp at 25 deg C)	329.86	----	4.72927	4.72927
Endrin	C12H8Cl6O	ClC1=C(Cl)C2(Cl)C3C4CC(C5OC45)C3C1(Cl)C2(Cl)Cl	1.163	8.588	5.2	-3.388	94.6352	2.74e-06	3e-06	(VP exp at 20 deg C)	340.17	330	3.94718	3.94718
Mirex	C10Cl12	ClC12C3(Cl)C4(Cl)C5(Cl)C(Cl)(C1(Cl)C4(Cl)Cl)C2(Cl)C(Cl)(Cl)C35Cl	68.5687	11.291	7.01	-4.281	91.6878	3.62e-06	----	(VP exp at --- deg C)	362.89	----	7.6331	7.6331
Isodrin	C12H8Cl6	ClC1=C(Cl)[C@]2(Cl)[C@H]3[C@H]4C[C@H](C=C4)[C@H]3[C@@]1(Cl)C2(Cl)Cl	0.166	9.245	6.5	-2.745	74.3068	1.87e-06	0.00012	(VP exp at 25 deg C)	329.86	----	4.72927	4.72927
Trifluralin	C13H16F3N3O4	CCCN(CCC)C1=C(C=C(C=C1[N+]([O-])=O)C(F)(F)F)[N+]([O-])=O	0.446	7.716	5.34	-2.376	69.6097	1.35e-05	4.58e-05	(VP exp at 25 deg C)	382.17	----	4.59777	4.59777
a-Chlordane	C10H6Cl8	ClC1CC2C(C1Cl)C1(Cl)C(Cl)=C(Cl)C2(Cl)C1(Cl)Cl	2.123	8.922	6.22	-2.702	81.9402	2e-05	9.98e-06	(VP exp at 25 deg C)	351.09	----	5.26999	5.26999
g-Chlordane	C10H6Cl8	ClC1CC2C(C1Cl)C1(Cl)C(Cl)=C(Cl)C2(Cl)C1(Cl)Cl	2.123	8.922	6.22	-2.702	75.6311	2e-05	9.98e-06	(VP exp at 25 deg C)	351.09	----	5.26999	5.26999
Oxychlordane	C10H4Cl8O	ClC1C2C(C3OC13Cl)C1(Cl)C(Cl)=C(Cl)C2(Cl)C1(Cl)Cl	2.222	10.932	5.48	-5.452	77.7178	6.99e-06	----	(VP exp at --- deg C)	353.24	353	5.04783	5.04783
Trans-nonachlor	C10H5Cl9	ClC1C(Cl)C2C(C1Cl)C1(Cl)C(Cl)=C(Cl)C2(Cl)C1(Cl)Cl	2.684	9.344	6.35	-2.994	81.0036	2.16e-06	1e-06	(VP exp at 25 deg C)	372.47	----	5.59124	5.59124
Cis-nonachlor	C10H5Cl9	ClC1C(Cl)C2C(C1Cl)C1(Cl)C(Cl)=C(Cl)C2(Cl)C1(Cl)Cl	2.684	9.344	6.35	-2.994	81.1361	2.16e-06	1e-06	(VP exp at 25 deg C)	372.47	----	5.59124	5.59124
Heptachlor	C10H5Cl7	ClC1C=CC2C1C1(Cl)C(Cl)=C(Cl)C2(Cl)C1(Cl)Cl	0.175	7.39	5.47	-1.92	66.6425	0.000238	0.0004	(VP exp at 25 deg C)	330.54	310	4.78429	4.78429
Heptachlor exo epoxide	C10H5Cl7O	ClC1C2OC2C2C1C1(Cl)C(Cl)=C(Cl)C2(Cl)C1(Cl)Cl	2.067	8.046	4.98	-3.066	81.2977	8.99e-06	1.95e-05	(VP exp at 30 deg C)	340.81	----	4.04376	4.04376
Endosulfan sulphate	C9H6Cl6O4S	ClC1=C(Cl)C2(Cl)C3COS(=O)(=O)OCC3C1(Cl)C2(Cl)Cl	1.31	8.537	3.66	-4.877	117.349	1.16e-07	2.8e-07	(VP exp at 25 deg C)	409.46	----	3.16131	3.16131
Endosulfan I	C9H6Cl6O3S	ClC1=C(Cl)[C@]2(Cl)[C@@H]3COS(=O)OC[C@@H]3C1(Cl)C2(Cl)Cl	1.31	6.406	3.83	-2.576	90.306	1.25e-06	6e-07	(VP exp at 25 deg C)	401.28	----	2.59913	2.59913
Endosulfan II	C9H6Cl6O3S	ClC1=C(Cl)[C@@]2(Cl)[C@H]3COS(=O)OC[C@H]3C1(Cl)C2(Cl)Cl	1.31	6.406	3.83	-2.576	104.723	1.25e-06	6e-07	(VP exp at 25 deg C)	401.28	----	2.59913	2.59913
a-HCH	C6H6Cl6	ClC1C(Cl)C(Cl)C(Cl)C(Cl)C1Cl	18.659	7.817	4.14	-3.677	96.3333	0.000245	3.52e-05	(VP exp at 25 deg C)	304.35	288	4.34554	4.34554
b-HCH	C6H6Cl6	ClC1C(Cl)C(Cl)C(Cl)C(Cl)C1Cl	18.659	7.817	4.14	-3.677	47.8333	0.000245	3.52e-05	(VP exp at 25 deg C)	304.35	288	4.34554	4.34554
g-HCH	C6H6Cl6	ClC1C(Cl)C(Cl)C(Cl)C(Cl)C1Cl	18.659	7.817	4.14	-3.677	90.8	0.000245	3.52e-05	(VP exp at 25 deg C)	304.35	288	4.34554	4.34554
p.p.DDE	C14H8Cl4	ClC(Cl)=C(C1=CC=C(Cl)C=C1)C1=CC=C(Cl)C=C1	1.44	9.279	6.51	-2.769	59.2	6.85e-05	6e-06	(VP exp at 25 deg C)	363.29	336	6.10556	6.10556
o.p.DDD	C14H10Cl4	ClC(Cl)C(C1=CC=C(Cl)C=C1)C1=CC=CC=C1Cl	2.462	9.346	5.87	-3.476	77.9667	1.69e-05	1.94e-06	(VP exp at 30 deg C)	366.75	----	6.11036	6.11036
p.p.DDT	C14H9Cl5	ClC1=CC=C(C=C1)C(C1=CC=C(Cl)C=C1)C(Cl)(Cl)Cl	3.114	10.378	6.91	-3.468	83.2667	0.00241	1.6e-07	(VP exp at 20 deg C)	367.95	260	6.4575	6.4575
d-HCH	C6H6Cl6	ClC1C(Cl)C(Cl)C(Cl)C(Cl)C1Cl	18.659	7.817	4.14	-3.677	65.0333	0.000245	3.52e-05	(VP exp at 25 deg C)	304.35	288	4.34554	4.34554
PCB-28	C12H7Cl3	ClC1=CC=C(C=C1)C1=CC=C(Cl)C=C1Cl	9.022	7.707	5.62	-2.087	79.6667	4e-05	0.0004	(VP exp at 25 deg C)	340.7	----	5.43261	5.43261
PCB-52	C12H6Cl4	ClC1=CC=C(Cl)C(=C1)C1=CC(Cl)=CC=C1Cl	14.649	8.177	6.09	-2.087	91.3333	8.45e-06	----	(VP exp at --- deg C)	359.51	----	6.03665	6.03665
PCB-101	C12H5Cl5	ClC1=CC=C(Cl)C(=C1)C1=CC(Cl)=C(Cl)C=C1Cl	31.947	9.234	6.8	-2.434	67.7	2.22e-06	2.52e-05	(VP exp at 25 deg C)	378.21	----	6.64069	6.64069
PCB-105	C12H5Cl5	ClC1=CC=C(C=C1Cl)C1=CC=C(Cl)C(Cl)=C1Cl	31.947	8.727	6.79	-1.937	61.5	4.59e-06	6.53e-06	(VP exp at 25 deg C)	378.21	365	6.64069	6.64069
PCB-114	C12H5Cl5	ClC1=CC=C(C=C1)C1=CC(Cl)=C(Cl)C(Cl)=C1Cl	26.838	9.403	6.98	-2.423	63.1333	5.47e-06	----	(VP exp at --- deg C)	378.21	----	6.64069	6.64069
PCB-118	C12H5Cl5	ClC1=CC=C(C=C1Cl)C1=CC(Cl)=C(Cl)C=C1Cl	31.947	9.049	7.12	-1.929	61.8667	2.22e-06	8.97e-06	(VP exp at 25 deg C)	378.21	----	6.64069	6.64069
PCB-123	C12H5Cl5	ClC1=CC=C(C(Cl)=C1)C1=CC(Cl)=C(Cl)C(Cl)=C1	19.893	9.403	6.98	-2.423	63.6333	2.22e-06	----	(VP exp at --- deg C)	378.21	----	6.64069	6.64069
PCB-138	C12H4Cl6	ClC1=CC=C(C(Cl)=C1Cl)C1=CC(Cl)=C(Cl)C=C1Cl	65.219	10.506	7.44	-3.066	58.5	5.81e-07	3.79e-06	(VP exp at 25 deg C)	396.9	----	7.24474	7.24474
PCB-153	C12H4Cl6	ClC1=CC(Cl)=C(C=C1Cl)C1=CC(Cl)=C(Cl)C=C1Cl	65.219	10.777	7.75	-3.027	64.9	5.81e-07	3.43e-06	(VP exp at 25 deg C)	396.9	----	7.24474	7.24474
PCB-156	C12H4Cl6	ClC1=CC=C(C=C1Cl)C1=CC(Cl)=C(Cl)C(Cl)=C1Cl	50.693	9.833	7.6	-2.233	57.1	5.81e-07	1.61e-06	(VP exp at 25 deg C)	396.9	----	7.24474	7.24474
PCB-157	C12H4Cl6	ClC1=CC=C(C(Cl)=C1Cl)C1=CC(Cl)=C(Cl)C(Cl)=C1	45.711	10.153	7.6	-2.553	57.4333	5.81e-07	----	(VP exp at --- deg C)	396.9	----	7.24474	7.24474
PCB-167	C12H4Cl6	ClC1=CC(Cl)=C(C=C1Cl)C1=CC(Cl)=C(Cl)C(Cl)=C1	45.711	10.053	7.5	-2.553	62.7333	5.81e-07	----	(VP exp at --- deg C)	396.9	----	7.24474	7.24474
PCB-180	C12H3Cl7	ClC1=CC(Cl)=C(C=C1Cl)C1=CC(Cl)=C(Cl)C(Cl)=C1Cl	102.248	11.658	8.27	-3.388	60.8	1.3e-07	9.77e-07	(VP exp at 25 deg C)	415.6	----	7.84878	7.84878
PCB-189	C12H3Cl7	ClC1=CC(=CC(Cl)=C1Cl)C1=CC(Cl)=C(Cl)C(Cl)=C1Cl	76.369	10.953	8.27	-2.683	55.2	1.3e-07	----	(VP exp at --- deg C)	415.6	----	7.84878	7.84878
PCB-209	C12Cl10	ClC1=C(Cl)C(Cl)=C(C(Cl)=C1Cl)C1=C(Cl)C(Cl)=C(Cl)C(Cl)=C1Cl	588.56	8.685	8.27	-0.415	55.0333	1.02e-10	1.06e-07	(VP exp at 25 deg C)	471.68	----	9.66092	9.66092
HCB	C6Cl6	ClC1=C(Cl)C(Cl)=C(Cl)C(Cl)=C1Cl	633.112	7.355	5.73	-1.625	82.5333	3.31e-06	1.72e-05	(VP exp at 25 deg C)	291.43	325	5.59751	5.59751
PeCB	C6HCl5	ClC1=CC(Cl)=C(Cl)C(Cl)=C1Cl	184.851	6.722	5.18	-1.542	57.9	0.00171	0.002	(VP exp at 25 deg C)	265.77	277	4.99347	4.99347
