# Supplementary material for: Non-target and suspect characterisation of organic contaminants in ambient air – Part 1: Combining a novel sample clean-up method with comprehensive two-dimensional gas chromatography
Source: Copernicus journal article supplement (doi:10.5194/acp-21-1697-2021), 2021-02-09
Supplement: Supplementary file 2 [file acp-21-1697-2021-supplement.zip]

Archive with 3 entries (3 files):
- Supplement.pdf
- acp-21-1697-2021-supplement-title-page.pdf
- Excel-20200505.xlsx
